# Supplementary material for: Transition metal-free C–F/C–Cl/C–C cleavage of ClCF2COONa for the synthesis of heterocycles
Source: Royal Society of Chemistry journal article supplement (doi:10.1039/c9ob01641d), 2019-01-01

# Electronic Supplementary Information

## Transition metal-free C-F/C-Cl/C-C cleavage of $\text{ClCF}_2\text{COONa}$ for the synthesis of heterocycles

Yizhe Yan,<sup>a,\*</sup> Chang Cui,<sup>a</sup> Jianyong Wang,<sup>b</sup> Shaoqing Li,<sup>a</sup> Lin Tang<sup>c</sup> and Yanqi Liu<sup>a</sup>

<sup>a</sup> School of Food and Biological Engineering, Henan Collaborative Innovation Center of Food Production and Safety, Henan Key Laboratory of Cold Chain Food Quality and Safety Control, Zhengzhou University of Light Industry, Zhengzhou, 450000, P. R. China.

E-mail: yanyizhe@mail.ustc.edu.cn

<sup>b</sup> School of Light Industry and Engineering, Qilu University of Technology (Shandong Academy of Sciences), Jinan, 250353, P. R. China

<sup>c</sup> College of Chemistry and Chemical Engineering, Xinyang Normal University, Xinyang, 464000, P. R. China.

### Contents

|                                                                               |            |
|-------------------------------------------------------------------------------|------------|
| <b>General Information</b>                                                    | <b>S1</b>  |
| <b>Experimental Procedure</b>                                                 | <b>S1</b>  |
| <b>Characterization of Products</b>                                           | <b>S2</b>  |
| <b>Detection Experiment of <math>\text{CF}_2</math> Carbene</b>               | <b>S9</b>  |
| <b>References</b>                                                             | <b>S10</b> |
| <b><math>^1\text{H}</math> NMR and <math>^{13}\text{C}</math> NMR Spectra</b> | <b>S11</b> |

## General Information

Unless otherwise indicated, all commercial reagents, including the substrates **1** and **2** were used without additional purification. <sup>1</sup>H-NMR spectra were recorded with a Bruker Ascend™ 600 spectrometer. Chemical shifts (in ppm) were referenced to tetramethylsilane ( $\delta = 0$  ppm) in CDCl<sub>3</sub> or DMSO-*d*<sup>6</sup> as an internal standard. <sup>13</sup>C-NMR spectra were obtained by the same NMR spectrometer and were calibrated with CDCl<sub>3</sub> ( $\delta = 77.00$  ppm) or DMSO-*d*<sup>6</sup> ( $\delta = 39.6$  ppm). MS was recorded on an AB SCIEX QTRAP 5500 LC-MS/MS. Melting point was recorded on a Hanon MP430 Auto Melting Point System.

## Experimental Procedure

### *Preparation of 2-Aminobenzamides*

2-Aminobenzamides (**4a-4i**) were synthesized from isatoic anhydride and the corresponding amines according to previous methods.<sup>4</sup> **4a**: 70% yield, white solid, mp 115-117 °C; **4b**: 60% yield, yellowish solid, mp 125-127 °C; **4c**: 49% yield, white solid, mp 140-142 °C; **4d**: 59% yield, white solid, mp 147-148 °C; **4e**: 36% yield, yellowish solid, mp 113-115 °C; **4f**: 81% yield, white solid, mp 123-125 °C; **4g**: 89% yield, white solid, mp 86-88 °C; **4h**: 58% yield, yellowish solid, mp 132-133 °C; **4i**: 59% yield, yellowish solid, mp 187-188 °C.

### *General Procedure for the Synthesis of Symmetrical 2,4-Disubstituted 1,3,5-Triazines*

Amidines **1** (0.4 mmol), ClCF<sub>2</sub>COONa (1 equiv), and Cs<sub>2</sub>CO<sub>3</sub> (2 equiv) were added to a 10 mL Schlenk tube, followed by addition of CH<sub>3</sub>CN (1 mL). The mixture was stirred at 120 °C for 24 h. The solution was then cooled to r.t., quenched by water and extracted with EtOAc (3×10 mL). The combined organic layers were dried over Na<sub>2</sub>SO<sub>4</sub>, filtered, and evaporated under vacuum. The residue was purified by column chromatography on silica gel to afford the symmetrical 2,4-disubstituted 1,3,5-triazines.

### *General Procedure for the Synthesis of Unsymmetrical 2,4-Disubstituted 1,3,5-Triazines*

Amidines **1** (0.2 mmol), amidines **1'** (0.8 mmol), ClCF<sub>2</sub>COONa (1 equiv), and Cs<sub>2</sub>CO<sub>3</sub> (2 equiv) were added to a 10 mL Schlenk tube, followed by addition of CH<sub>3</sub>CN (1 mL). The mixture was stirred at 120 °C for 24 h. The solution was then cooled to r.t., quenched by water and extracted with EtOAc (3×10 mL). The combined organic layers were dried over Na<sub>2</sub>SO<sub>4</sub>, filtered, and evaporated under vacuum. The residue was purified by column chromatography on silica gel to afford the unsymmetrical 2,4-disubstituted 1,3,5-triazines.

### *General Procedure for the Synthesis of Quinazolinones*

2-Aminobenzamides **4** (0.2 mmol), ClCF<sub>2</sub>COONa (2 equiv), and Cs<sub>2</sub>CO<sub>3</sub> (2 equiv) were added to a 10 mL Schlenk tube, followed by addition of CH<sub>3</sub>CN (1 mL). The mixture was stirred at 120 °C for 24 h. The solution was then cooled to r.t., quenched by water and extracted with EtOAc (3×10 mL). The combined organic layers were dried over Na<sub>2</sub>SO<sub>4</sub>, filtered, and evaporated under vacuum. The residue was purified by column chromatography on silica gel to afford the quinazolinones.

### Gram-scale Synthesis of 2,4-Diphenyl-1,3,5-triazine

Benzamidinium hydrochloride (10 mmol), ClCF<sub>2</sub>COONa (1 equiv), and Cs<sub>2</sub>CO<sub>3</sub> (2 equiv) were added to a 50 mL Schlenk tube, followed by addition of CH<sub>3</sub>CN (25 mL). The mixture was stirred at 80 °C for 24 h. After cooling, the solution was evaporated under vacuum to remove the solvent, quenched by water and extracted with EtOAc (3×30 mL). The combined organic layers were dried over Na<sub>2</sub>SO<sub>4</sub>, filtered, and evaporated under vacuum. The residue was purified by column chromatography on silica gel to afford the 2,4-diphenyl-1,3,5-triazine as a white solid (1.024 g, 88% yield).

### Characterization of Products

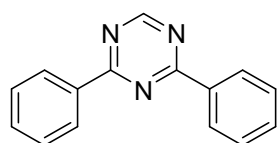

2,4-diphenyl-1,3,5-triazine (**3a**)<sup>1</sup>: 44.7 mg (96%); Yellowish solid; Mp: 74-75 °C; <sup>1</sup>H NMR (600 MHz, CDCl<sub>3</sub>): δ 9.26 (s, 1H), 8.66-8.63 (m, 4H), 7.63-7.59 (m, 2H), 7.57-7.54 (m, 4H); <sup>13</sup>C NMR (150 MHz, CDCl<sub>3</sub>): δ 171.3, 166.7, 135.5, 132.8, 128.9, 128.7.

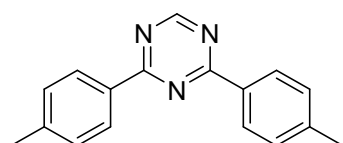

2,4-di-*p*-tolyl-1,3,5-triazine (**3b**)<sup>1</sup>: 39.7 mg (76%); White solid; Mp: 159-161 °C; <sup>1</sup>H NMR (600 MHz, CDCl<sub>3</sub>): δ 9.19 (s, 1H), 8.52 (d, *J* = 8.2 Hz, 4H), 7.34 (d, *J* = 8.0 Hz, 4H), 2.46 (s, 6H); <sup>13</sup>C NMR (150 MHz, CDCl<sub>3</sub>): δ 171.1, 166.3, 143.5, 132.8, 129.5, 128.9, 21.7.

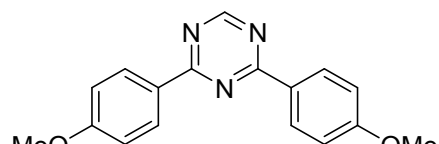

2,4-bis(4-methoxyphenyl)-1,3,5-triazine (**3c**)<sup>1</sup>: 36.3 mg (62%); White solid; Mp: 158-160 °C; <sup>1</sup>H NMR (600 MHz, CDCl<sub>3</sub>): δ 9.11 (s, 1H), 8.59-8.57 (m, 4H), 7.04-7.02 (m, 4H), 3.91 (s, 6H); <sup>13</sup>C NMR (150 MHz, CDCl<sub>3</sub>): δ 170.5, 166.3, 163.4, 130.7, 128.1, 114.0, 55.4.

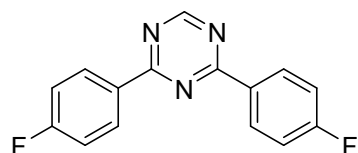

2,4-bis(4-fluorophenyl)-1,3,5-triazine (**3d**)<sup>1</sup>: 46.8 mg (87%); White solid; Mp: 154-156 °C; <sup>1</sup>H NMR (600 MHz, CDCl<sub>3</sub>): δ 9.18 (s, 1H), 8.64-8.61 (m, 4H), 7.23-7.19 (m,

4H);  $^{13}\text{C}$  NMR (150 MHz,  $\text{CDCl}_3$ ):  $\delta$  170.3, 166.6, 165.9 (d,  $J = 252.6$  Hz), 131.5 (d,  $J = 2.7$  Hz), 131.2 (d,  $J = 9.2$  Hz), 115.9 (d,  $J = 21.8$  Hz).

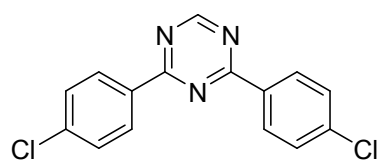

130.2, 129.1.

2,4-bis(4-chlorophenyl)-1,3,5-triazine (**3e**)<sup>1</sup>: 56.2 mg (93%); White solid; Mp: 189-191 °C;  $^1\text{H}$  NMR (600 MHz,  $\text{CDCl}_3$ ):  $\delta$  9.23 (s, 1H), 8.56 (d,  $J = 8.1$  Hz, 4H), 7.51 (d,  $J = 8.1$  Hz, 4H);  $^{13}\text{C}$  NMR (150 MHz,  $\text{CDCl}_3$ ):  $\delta$  170.5, 166.8, 139.3, 133.8,

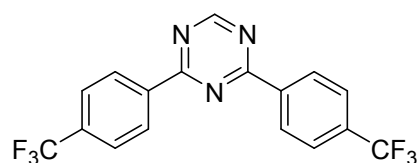

167.1, 138.4, 134.4 (q,  $J = 32.6$  Hz), 129.3, 125.8 (q,  $J = 3.5$  Hz), 123.8 (q,  $J = 270.9$  Hz).

2,4-bis(4-(trifluoromethyl)phenyl)-1,3,5-triazine (**3f**)<sup>1</sup>: 63.4 mg (86%); White solid; Mp: 151-153 °C;  $^1\text{H}$  NMR (600 MHz,  $\text{CDCl}_3$ ):  $\delta$  9.34 (s, 1H), 8.75 (d,  $J = 8.2$  Hz, 4H), 7.82 (d,  $J = 8.2$  Hz, 4H);  $^{13}\text{C}$  NMR (150 MHz,  $\text{CDCl}_3$ ):  $\delta$  170.4,

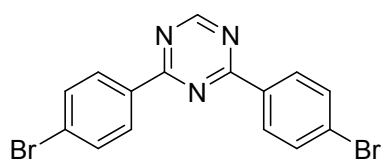

130.4, 128.1.

2,4-bis(4-bromophenyl)-1,3,5-triazine (**3g**)<sup>1</sup>: 60.2 mg (77%); White solid; Mp: 195-197 °C;  $^1\text{H}$  NMR (600 MHz,  $\text{CDCl}_3$ ):  $\delta$  9.23 (s, 1H), 8.48 (d,  $J = 8.5$  Hz, 4H), 7.68 (d,  $J = 8.5$  Hz, 4H);  $^{13}\text{C}$  NMR (150 MHz,  $\text{CDCl}_3$ ):  $\delta$  170.6, 166.8, 134.3, 132.1,

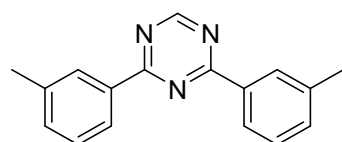

126.1, 21.5.

2,4-di-*m*-tolyl-1,3,5-triazine (**3h**)<sup>1</sup>: 46.9 mg (90%); White solid; Mp: 87-89 °C;  $^1\text{H}$  NMR (600 MHz,  $\text{CDCl}_3$ ):  $\delta$  9.23 (s, 1H), 8.45-8.43 (m, 4H), 7.46-7.40 (m, 4H), 2.49 (s, 6H);  $^{13}\text{C}$  NMR (150 MHz,  $\text{CDCl}_3$ ):  $\delta$  171.4, 166.5, 138.5, 135.4, 133.6, 129.3, 128.7,

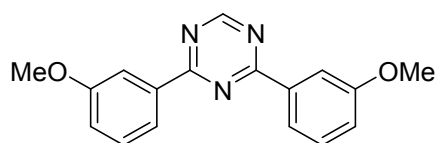

126.1, 21.5.

2,4-bis(3-methoxyphenyl)-1,3,5-triazine (**3i**)<sup>1</sup>: 43.9 mg (75%); White solid; Mp: 109-110 °C;  $^1\text{H}$  NMR (600 MHz,  $\text{CDCl}_3$ ):  $\delta$  9.25 (s, 1H), 8.24 (d,  $J = 7.8$  Hz, 2H), 8.16 (s, 2H), 7.46 (t,  $J = 7.8$  Hz, 2H), 7.15 (dd,  $J_1 = 8.0$  Hz,  $J_2 = 1.9$  Hz, 2H), 3.94 (s, 6H);  $^{13}\text{C}$  NMR (150 MHz,  $\text{CDCl}_3$ ):  $\delta$  171.1, 166.6, 159.9, 136.9, 129.8, 121.4, 119.2, 113.3, 55.4.

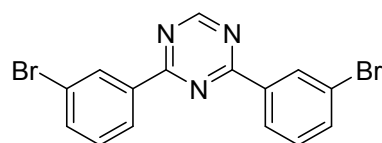

2,4-bis(3-bromophenyl)-1,3,5-triazine (**3j**)<sup>1</sup>: 39.1 mg (50%); White solid; Mp: 182-183 °C;  $^1\text{H}$  NMR (600 MHz,  $\text{CDCl}_3$ ):  $\delta$  9.27 (s, 1H), 8.76 (t,  $J = 1.5$  Hz, 2H), 8.56

(d,  $J = 7.8$  Hz, 2H), 7.74 (dd,  $J_1 = 7.9$  Hz,  $J_2 = 1.0$  Hz, 2H), 7.44 (t,  $J = 7.9$  Hz, 2H);  $^{13}\text{C}$  NMR (150 MHz,  $\text{CDCl}_3$ ):  $\delta$  170.3, 166.9, 137.3, 135.9, 131.8, 130.3, 127.5, 123.1.

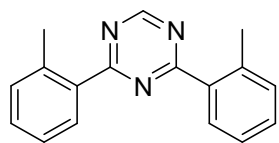

2,4-di-*o*-tolyl-1,3,5-triazine (**3k**)<sup>1</sup>: 39.2 mg (75%); Yellowish oil;  $^1\text{H}$  NMR (600 MHz,  $\text{CDCl}_3$ ):  $\delta$  9.32 (s, 1H), 8.15 (dd,  $J_1 = 7.7$  Hz,  $J_2 = 0.7$  Hz, 2H), 7.43 (td,  $J_1 = 7.4$  Hz,  $J_2 = 1.1$  Hz, 2H), 7.36-7.31 (m, 4H), 2.72 (s, 6H);  $^{13}\text{C}$  NMR (150 MHz,  $\text{CDCl}_3$ ):  $\delta$  173.8, 165.6, 138.9, 135.4, 131.8, 131.2, 131.1, 126.1, 22.0.

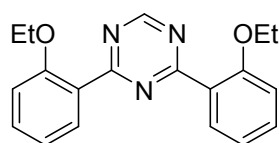

2,4-bis(2-ethoxyphenyl)-1,3,5-triazine (**3l**)<sup>1</sup>: 54.0 mg (84%); Colorless oil;  $^1\text{H}$  NMR (600 MHz,  $\text{CDCl}_3$ ):  $\delta$  9.32 (s, 1H), 7.99 (dd,  $J_1 = 7.7$  Hz,  $J_2 = 1.8$  Hz, 2H), 7.48-7.44 (m, 2H), 7.07 (td,  $J_1 = 7.5$  Hz,  $J_2 = 0.8$  Hz, 2H), 7.04 (d,  $J = 8.4$  Hz, 2H), 4.16 (q,  $J = 7.0$  Hz, 4H), 1.44 (t,  $J = 7.0$  Hz, 6H);  $^{13}\text{C}$  NMR (150 MHz,  $\text{CDCl}_3$ ):  $\delta$  172.6, 165.4, 158.0, 132.5, 132.2, 126.2, 120.5, 113.4, 64.5, 14.7.

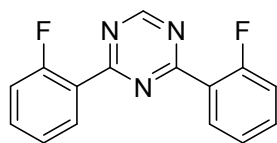

2,4-bis(2-fluorophenyl)-1,3,5-triazine (**3m**)<sup>1</sup>: 39.2 mg (73%); White solid; Mp: 63-65 °C;  $^1\text{H}$  NMR (600 MHz,  $\text{CDCl}_3$ ):  $\delta$  9.39 (s, 1H), 8.36 (td,  $J_1 = 7.7$  Hz,  $J_2 = 1.7$  Hz, 2H), 7.58-7.54 (m, 2H), 7.34-7.30 (m, 2H), 7.27-7.23 (m, 2H);  $^{13}\text{C}$  NMR (150 MHz,  $\text{CDCl}_3$ ):  $\delta$  170.4 (d,  $J = 5.1$  Hz), 166.5, 162.2 (d,  $J = 258.3$  Hz), 134.0 (d,  $J = 9.3$  Hz), 132.2, 124.4 (d,  $J = 3.8$  Hz), 124.0 (d,  $J = 7.8$  Hz), 117.3 (d,  $J = 22.4$  Hz).

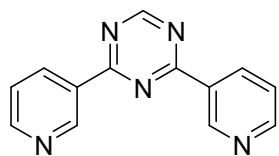

2,4-di(pyridin-3-yl)-1,3,5-triazine (**3n**)<sup>1</sup>: 9.9 mg (21%); Yellowish solid; Mp: 181-183 °C;  $^1\text{H}$  NMR (600 MHz,  $\text{CDCl}_3$ ):  $\delta$  9.83 (s, 2H), 9.34 (s, 1H), 8.89 (d,  $J = 7.8$  Hz, 2H), 8.87 (d,  $J = 3.3$  Hz, 2H), 7.54-7.51 (dd,  $J_1 = 7.4$  Hz,  $J_2 = 4.9$  Hz, 2H);  $^{13}\text{C}$  NMR (150 MHz,  $\text{CDCl}_3$ ):  $\delta$  170.0, 167.0, 153.1, 150.1, 136.5, 131.0, 123.8.

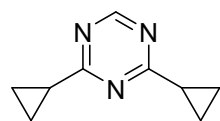

2,4-dicyclopropyl-1,3,5-triazine (**3o**)<sup>1</sup>: 16.9 mg (52%); Yellowish oil;  $^1\text{H}$  NMR (600 MHz,  $\text{CDCl}_3$ ):  $\delta$  8.71 (s, 1H), 2.12-2.07 (m, 2H), 1.23-1.19 (m, 4H), 1.15-1.11 (m, 4H);  $^{13}\text{C}$  NMR (150 MHz,  $\text{CDCl}_3$ ):  $\delta$  179.6, 164.6, 17.7, 12.0.

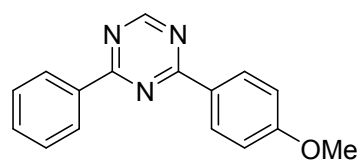

2-(4-methoxyphenyl)-4-phenyl-1,3,5-triazine (**3p**)<sup>1</sup>: 31.5 mg (60%); White solid; Mp: 107-109 °C; <sup>1</sup>H NMR (600 MHz, CDCl<sub>3</sub>): δ 9.18 (s, 1H), 8.63-8.59 (m, 4H), 7.61-7.58 (m, 1H), 7.56-7.53 (m, 2H), 7.05-7.02 (m, 2H), 3.91 (s, 3H); <sup>13</sup>C NMR (150 MHz, CDCl<sub>3</sub>): δ 171.0, 170.8, 166.5, 163.6, 135.7, 132.7, 130.8, 128.8, 128.7, 127.9, 114.1, 55.5.

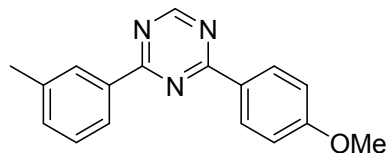

2-(4-methoxyphenyl)-4-(*m*-tolyl)-1,3,5-triazine (**3q**)<sup>2</sup>: 32.2 mg (58%); White solid; Mp: 111-113 °C; <sup>1</sup>H NMR (600 MHz, CDCl<sub>3</sub>): δ 9.17 (s, 1H), 8.62-8.58 (m, 2H), 8.43-8.41 (m, 2H), 7.45-7.39 (m, 2H), 7.06-7.02 (m, 2H), 3.91 (s, 3H), 2.48 (s, 3H); <sup>13</sup>C NMR (150 MHz, CDCl<sub>3</sub>): δ 171.1, 170.7, 166.3, 163.5, 138.4, 135.5, 133.5, 130.9, 129.3, 128.6, 127.9, 126.0, 114.1, 55.4, 21.5.

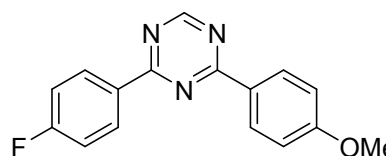

2-(4-fluorophenyl)-4-(4-methoxyphenyl)-1,3,5-triazine (**3r**)<sup>2</sup>: 34.4 mg (61%); White solid; Mp: 152-154 °C; <sup>1</sup>H NMR (600 MHz, CDCl<sub>3</sub>): δ 9.15 (s, 1H), 8.65-8.62 (m, 2H), 8.59-8.57 (m, 2H), 7.23-7.19 (m, 2H), 7.05-7.02 (m, 2H), 3.91 (s, 3H); <sup>13</sup>C NMR (150 MHz, CDCl<sub>3</sub>): δ 170.8, 170.0, 166.4, 165.8 (d, *J* = 252.3 Hz), 163.6, 131.9 (d, *J* = 2.9 Hz), 131.2 (d, *J* = 9.2 Hz), 130.8, 127.8, 115.8 (d, *J* = 21.7 Hz), 114.1, 55.5.

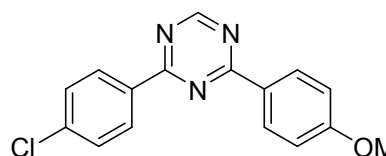

2-(4-chlorophenyl)-4-(4-methoxyphenyl)-1,3,5-triazine (**3s**)<sup>1</sup>: 44 mg (74%); Yellow solid; Mp: 128-130 °C; <sup>1</sup>H NMR (600 MHz, CDCl<sub>3</sub>): δ 9.16 (s, 1H), 8.59-8.54 (m, 4H), 7.52-7.49 (m, 2H), 7.05-7.02 (m, 2H), 3.91 (s, 3H); <sup>13</sup>C NMR (150 MHz, CDCl<sub>3</sub>): δ 170.9, 170.1, 166.5, 163.7, 139.0, 134.2, 130.9, 130.1, 129.0, 127.8, 114.1, 55.5.

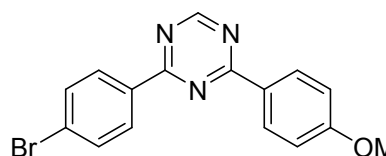

2-(4-bromophenyl)-4-(4-methoxyphenyl)-1,3,5-triazine (**3t**)<sup>3</sup>: 30.8 mg (45%); White solid; Mp: 170-172 °C; <sup>1</sup>H NMR (600 MHz, CDCl<sub>3</sub>): δ 9.17 (s, 1H), 8.60-8.55 (m, 4H), 7.52-7.49 (m, 2H), 7.05-7.02 (m, 2H), 3.92 (s, 3H); <sup>13</sup>C NMR (150 MHz, CDCl<sub>3</sub>): δ 170.9, 170.1, 166.5, 163.7, 139.0, 134.2, 130.9, 130.1, 129.0, 127.7, 114.1, 55.5.

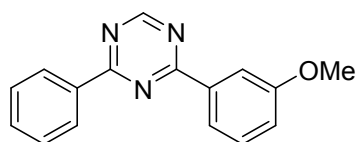

2-(3-methoxyphenyl)-4-phenyl-1,3,5-triazine (**3u**)<sup>2</sup>: 24.7 mg (47%); White solid; Mp: 85-87°C; <sup>1</sup>H NMR (600 MHz, CDCl<sub>3</sub>): δ 9.24 (s, 1H), 8.65-8.61 (m, 2H), 8.24 (d, *J* = 7.7 Hz, 1H), 8.17-8.16 (m, 1H), 7.60 (t, *J* = 7.3 Hz, 1H), 7.54 (t, *J* = 7.5 Hz, 2H), 7.45

(t,  $J = 7.9$  Hz, 1H), 7.16-7.13 (m, 1H), 3.93 (s, 3H);  $^{13}\text{C}$  NMR (150 MHz,  $\text{CDCl}_3$ ):  $\delta$  171.2, 171.1, 166.6, 159.9, 136.9, 135.4, 132.8, 129.7, 128.9, 128.7, 121.4, 119.1, 113.3, 55.4.

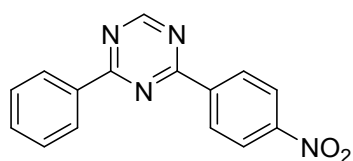

2-(4-nitrophenyl)-4-phenyl-1,3,5-triazine (**3v**)<sup>1</sup>: 18.4 mg (33%); White solid; Mp: 171-173 °C;  $^1\text{H}$  NMR (600 MHz,  $\text{CDCl}_3$ ):  $\delta$  9.31 (s, 1H), 8.81-8.78 (m, 2H), 8.64-8.62 (m, 2H), 8.39-8.36 (m, 2H), 7.66-7.62 (m, 1H), 7.59-7.55 (m, 2H);  $^{13}\text{C}$  NMR (150 MHz,  $\text{CDCl}_3$ ):  $\delta$  171.8, 169.4, 167.0, 150.4, 141.2, 134.9, 133.3, 129.8, 129.0, 128.9, 123.8.

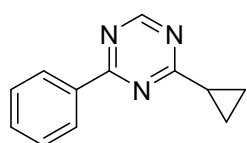

2-cyclopropyl-4-phenyl-1,3,5-triazine (**3w**)<sup>1</sup>: 15.8 mg (40%); White solid; Mp: 53-55 °C;  $^1\text{H}$  NMR (600 MHz,  $\text{CDCl}_3$ ):  $\delta$  8.99 (s, 1H), 8.49 (d,  $J = 7.7$  Hz, 2H), 7.57 (t,  $J = 7.2$  Hz, 1H), 7.50 (t,  $J = 7.6$  Hz, 2H), 2.29-2.24 (m, 1H), 1.37-1.33 (m, 2H), 1.24-1.20 (m, 2H);  $^{13}\text{C}$  NMR (150 MHz,  $\text{CDCl}_3$ ):  $\delta$  180.6, 170.4, 165.4, 135.3, 132.7, 128.8, 128.6, 18.1, 12.4.

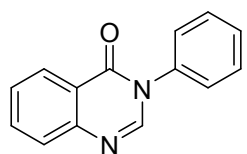

3-phenylquinazolin-4(3H)-one (**5a**)<sup>4</sup>: 25.8 mg (58%); White solid; Mp: 133-135 °C;  $^1\text{H}$  NMR (600 MHz,  $\text{CDCl}_3$ ):  $\delta$  8.38-8.35 (m, 1H), 8.13 (s, 1H), 7.82-7.75 (m, 2H), 7.57-7.53 (m, 3H), 7.51-7.47 (m, 1H), 7.44-7.41 (m, 2H);  $^{13}\text{C}$  NMR (150 MHz,  $\text{CDCl}_3$ ):  $\delta$  160.7, 147.8, 146.0, 137.4, 134.5, 129.6, 129.1, 127.6, 127.5, 127.1, 126.9, 122.3.

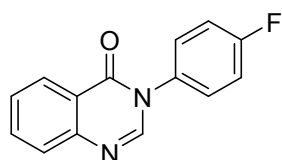

3-(4-fluorophenyl)quinazolin-4(3H)-one (**5b**)<sup>4</sup>: 28.9 mg (60%); White solid; Mp: 180-182 °C;  $^1\text{H}$  NMR (600 MHz,  $\text{CDCl}_3$ ):  $\delta$  8.36 (dd,  $J_1 = 8.0$  Hz,  $J_2 = 1.0$  Hz, 1H), 8.11 (s, 1H), 7.84-7.77 (m, 2H), 7.56-7.54 (m, 1H), 7.44-7.40 (m, 2H), 7.26-7.22 (m, 2H);  $^{13}\text{C}$  NMR (150 MHz,  $\text{CDCl}_3$ ):  $\delta$  162.6 (d,  $J = 248.0$  Hz), 160.7, 147.7, 145.8, 134.7, 133.3 (d,  $J = 3.1$  Hz), 128.9 (d,  $J = 8.8$  Hz), 127.8, 127.6, 127.2, 122.2, 116.7 (d,  $J = 22.9$  Hz).

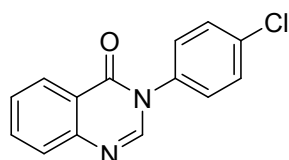

3-(4-chlorophenyl)quinazolin-4(3H)-one (**5c**)<sup>4</sup>: 28.8 mg (56%); White solid; Mp: 200-202 °C;  $^1\text{H}$  NMR (600 MHz,  $\text{DMSO-}d_6$ ):  $\delta$  8.37 (s, 1H), 8.21 (dd,  $J_1 = 7.9$  Hz,  $J_2 = 1.2$  Hz, 1H), 7.92-7.88 (m, 1H), 7.76 (d,  $J = 7.8$  Hz, 1H), 7.67-7.63 (m, 2H), 7.63-7.59 (m, 3H);  $^{13}\text{C}$  NMR (150 MHz,  $\text{DMSO-}d_6$ ):  $\delta$  160.0, 147.7, 147.1, 136.5, 134.9, 133.5, 129.6, 129.3, 127.6, 127.3, 126.6, 121.9.

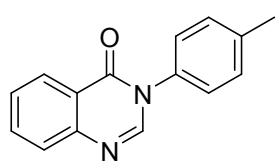

3-(*p*-tolyl)quinazolin-4(*3H*)-one (**5d**)<sup>4</sup>: 28.4 mg (60%); White solid; Mp: 143-144 °C; <sup>1</sup>H NMR (600 MHz, CDCl<sub>3</sub>): δ 8.37 (dd, *J*<sub>1</sub> = 8.0 Hz, *J*<sub>2</sub> = 0.9 Hz, 1H), 8.14 (s, 1H), 7.81-7.76 (m, 2H), 7.57-7.53 (m, 1H), 7.35 (d, *J* = 8.1 Hz, 2H), 7.32-7.29 (m, 2H), 2.44 (s, 3H); <sup>13</sup>C NMR (150 MHz, CDCl<sub>3</sub>): δ 160.7, 147.5, 146.3, 139.3, 134.8, 134.5, 130.2, 127.6, 127.3, 127.2, 126.7, 122.3, 21.2.

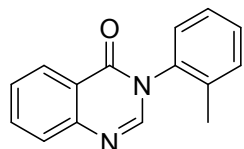

3-(*o*-tolyl)quinazolin-4(*3H*)-one (**5e**)<sup>4</sup>: 28.3 mg (60%); Colorless oil; <sup>1</sup>H NMR (600 MHz, CDCl<sub>3</sub>): δ 8.39-8.37 (m, 1H), 8.02 (s, 1H), 7.83-7.79 (m, 2H), 7.58-7.54 (m, 1H), 7.43-7.35 (m, 3H), 7.27-7.25 (m, 1H), 2.21 (s, 3H); <sup>13</sup>C NMR (150 MHz, CDCl<sub>3</sub>): δ 160.3, 147.8, 146.3, 136.5, 135.8, 134.6, 131.3, 129.7, 127.8, 127.6, 127.4, 127.3, 127.2, 122.3, 17.7.

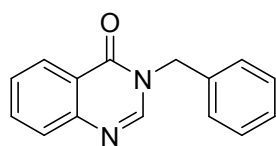

3-benzylquinazolin-4(*3H*)-one (**5f**)<sup>4</sup>: 19.4 mg (41%); White solid; Mp: 115-117 °C; <sup>1</sup>H NMR (600 MHz, CDCl<sub>3</sub>): δ 8.33 (dd, *J*<sub>1</sub> = 8.0 Hz, *J*<sub>2</sub> = 1.0 Hz, 1H), 8.15 (s, 1H), 7.78-7.71 (m, 2H), 7.53-7.49 (m, 1H), 7.37-7.30 (m, 5H), 5.21 (s, 2H); <sup>13</sup>C NMR (150 MHz, CDCl<sub>3</sub>): δ 161.0, 147.7, 146.4, 135.6, 134.3, 129.0, 128.3, 128.0, 127.4, 127.3, 126.9, 122.1, 49.6.

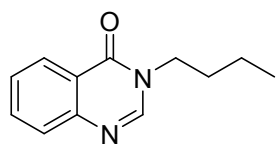

3-butylquinazolin-4(*3H*)-one (**5g**)<sup>4</sup>: 13.4 mg (33%); White solid; Mp: 69-70 °C; <sup>1</sup>H NMR (600 MHz, CDCl<sub>3</sub>): δ 8.32 (dd, *J*<sub>1</sub> = 8.0 Hz, *J*<sub>2</sub> = 0.8 Hz, 1H), 8.11 (s, 1H), 7.78-7.72 (m, 2H), 7.53-7.50 (m, 1H), 4.03 (t, *J* = 7.4 Hz, 2H), 1.79 (quintet, *J* = 7.5 Hz, 2H), 1.42 (sextet, *J* = 7.5 Hz, 2H), 0.98 (t, *J* = 7.4 Hz, 3H); <sup>13</sup>C NMR (150 MHz, CDCl<sub>3</sub>): δ 160.9, 147.6, 146.7, 134.2, 127.3, 127.1, 126.7, 122.0, 46.9, 31.4, 19.8, 13.6.

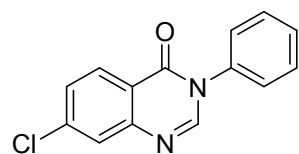

7-chloro-3-phenylquinazolin-4(*3H*)-one (**5h**)<sup>4</sup>: 22.2 mg (43%); White solid; Mp: 145-146 °C; <sup>1</sup>H NMR (600 MHz, CDCl<sub>3</sub>): δ 8.29 (d, *J* = 0.8 Hz, 1H), 8.15 (s, 1H), 7.77 (d, *J* = 2.0 Hz, 1H), 7.58-7.54 (m, 2H), 7.52-7.49 (m, 2H), 7.43-7.41 (m, 2H); <sup>13</sup>C NMR (150 MHz, CDCl<sub>3</sub>): δ 160.1, 148.7, 147.3, 140.9, 137.1, 129.7, 129.3, 128.6, 128.3, 127.1, 126.9, 120.8.

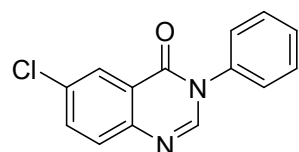

6-chloro-3-phenylquinazolin-4(*3H*)-one (**5i**)<sup>4</sup>: 23.1 mg (45%); White solid; Mp: 178-179 °C; <sup>1</sup>H NMR (600 MHz, CDCl<sub>3</sub>): δ 8.32 (d, *J* = 2.2 Hz, 1H), 8.12 (s, 1H), 7.75-7.70 (m, 2H), 7.58-7.51 (m, 2H), 7.51-7.49 (m, 1H), 7.43-7.41 (m, 2H); <sup>13</sup>C NMR (150 MHz, CDCl<sub>3</sub>): δ 159.7, 146.2, 137.1, 135.0, 133.5, 129.7, 129.3, 129.2, 126.9, 126.5, 123.4.





## Detection Experiment of CF<sub>2</sub> Carbene

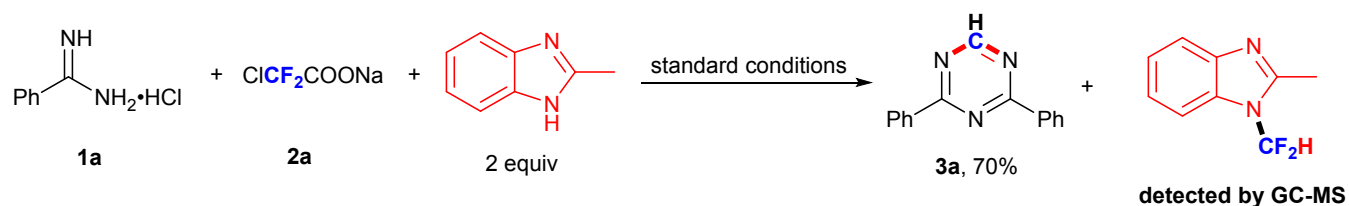

Amidines **1** (0.4 mmol), ClCF<sub>2</sub>COONa (1 equiv), 2-methyl-1*H*-benzo[*d*]imidazole (2 equiv) and Cs<sub>2</sub>CO<sub>3</sub> (2 equiv) were added to a 10 mL Schlenk tube, followed by addition of CH<sub>3</sub>CN (1 mL). The mixture was stirred at 120 °C for 24 h. The solution was then cooled to r.t., quenched by water and extracted with EtOAc (3×10 mL). The combined organic layers were dried over Na<sub>2</sub>SO<sub>4</sub>, filtered, and evaporated under vacuum. The residue was purified by column chromatography on silica gel to afford **3a** in 70% yield. Meanwhile, trace amount of residue was dissolved in CH<sub>2</sub>Cl<sub>2</sub> and analyzed by GC-MS.

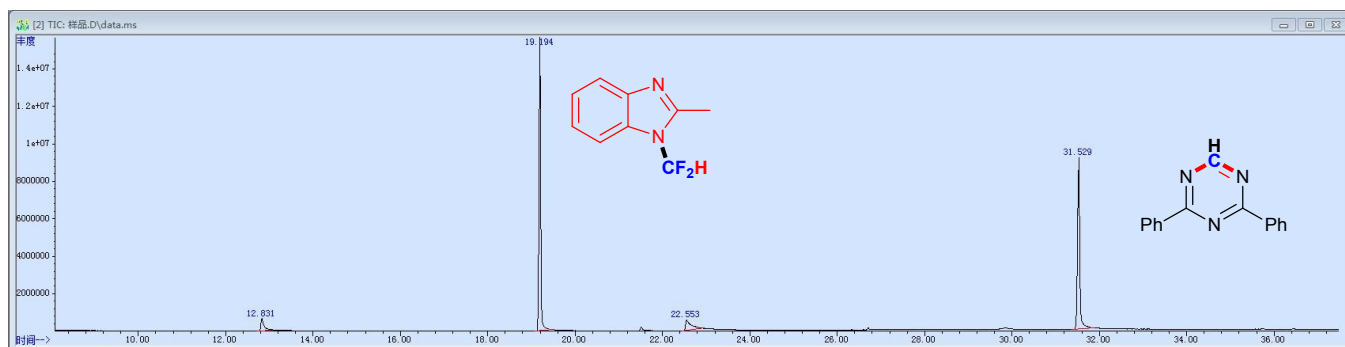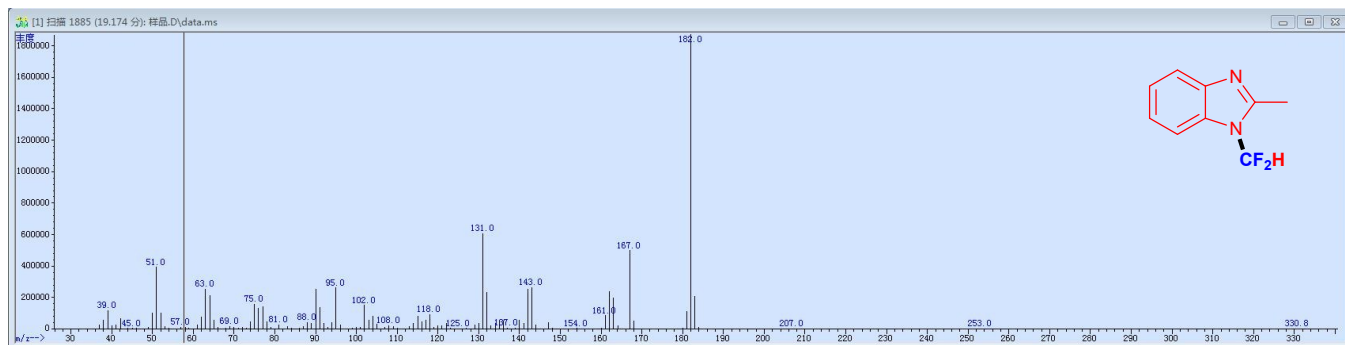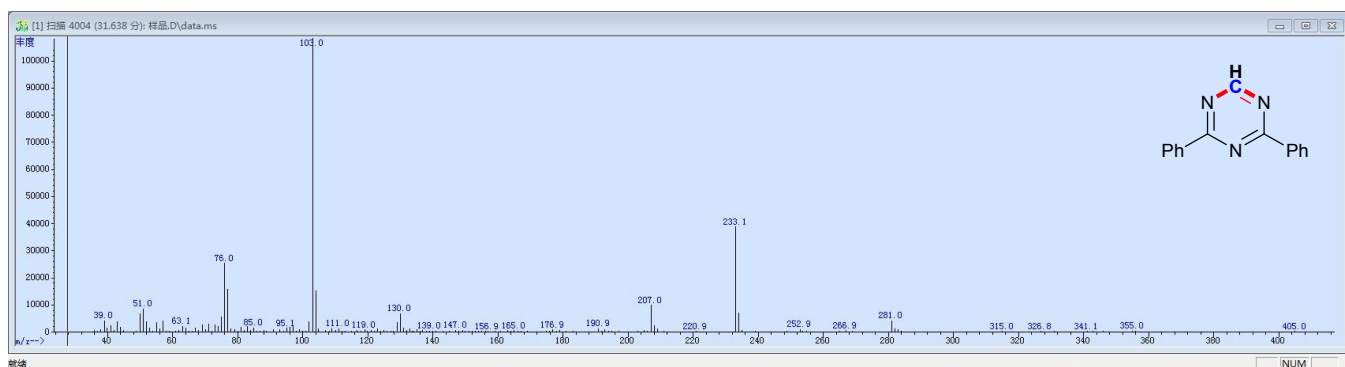

## References

1. Y. Yan, Z. Li, H. Li, C. Cui, M. Shi, Y. Liu, *Org. Lett.* **2017**, *19*, 6228.
2. Y. Yan, C. Cui, J. Wang, S. Li, Y. Liu, *Adv. Synth. Catal.* **2019**, *361*, 1166.
3. X. Lu, X. Xin, B. Wan, *Tetrahedron Lett.* **2018**, *59*, 361.
4. Y. Bao, Y. Yan, K. Xu, J. Su, Z. Zha, Z. Wang, *J. Org. Chem.* **2015**, *80*, 47362.

# $^1\text{H}$ NMR and $^{13}\text{C}$ NMR Spectra

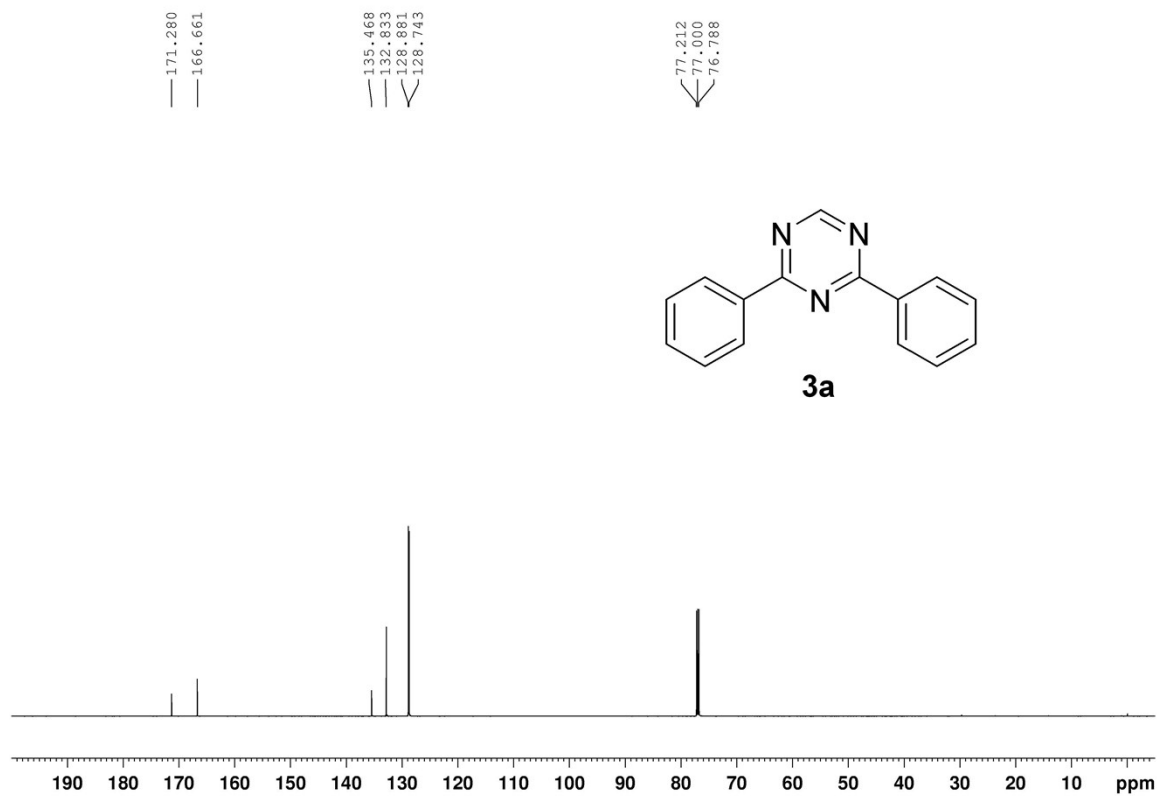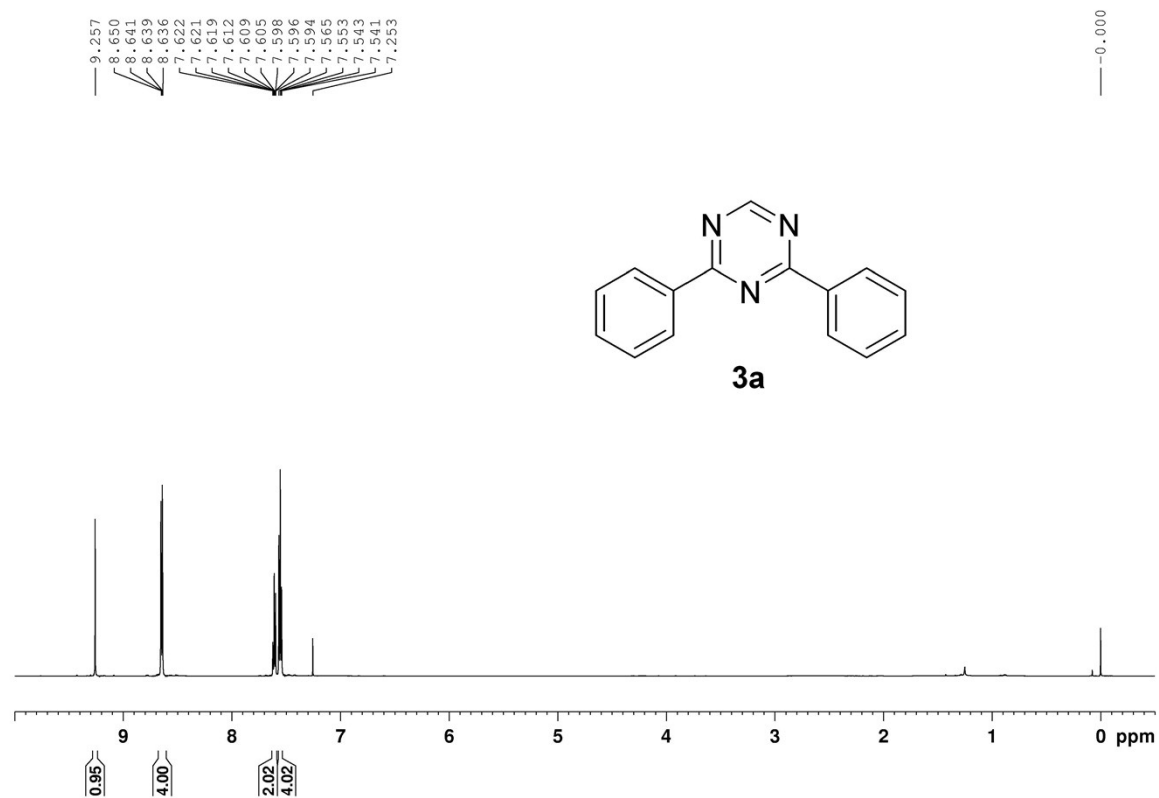

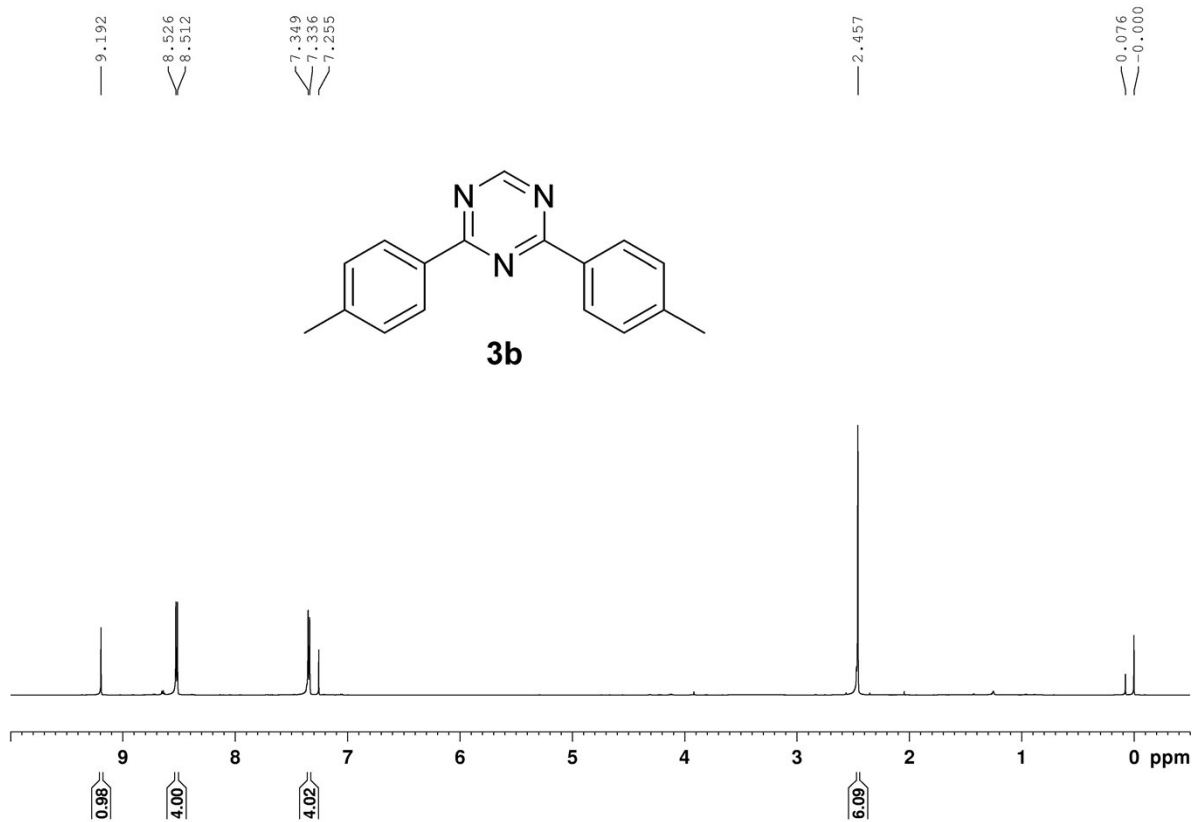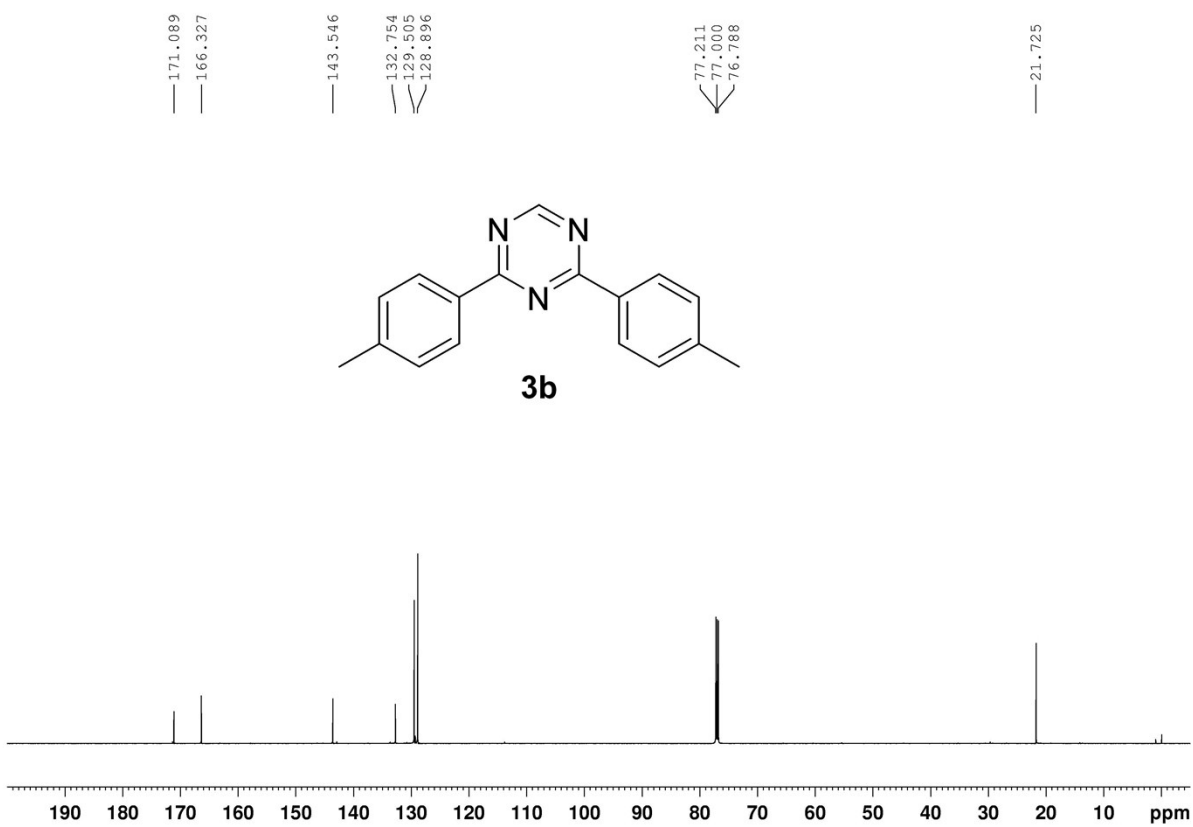

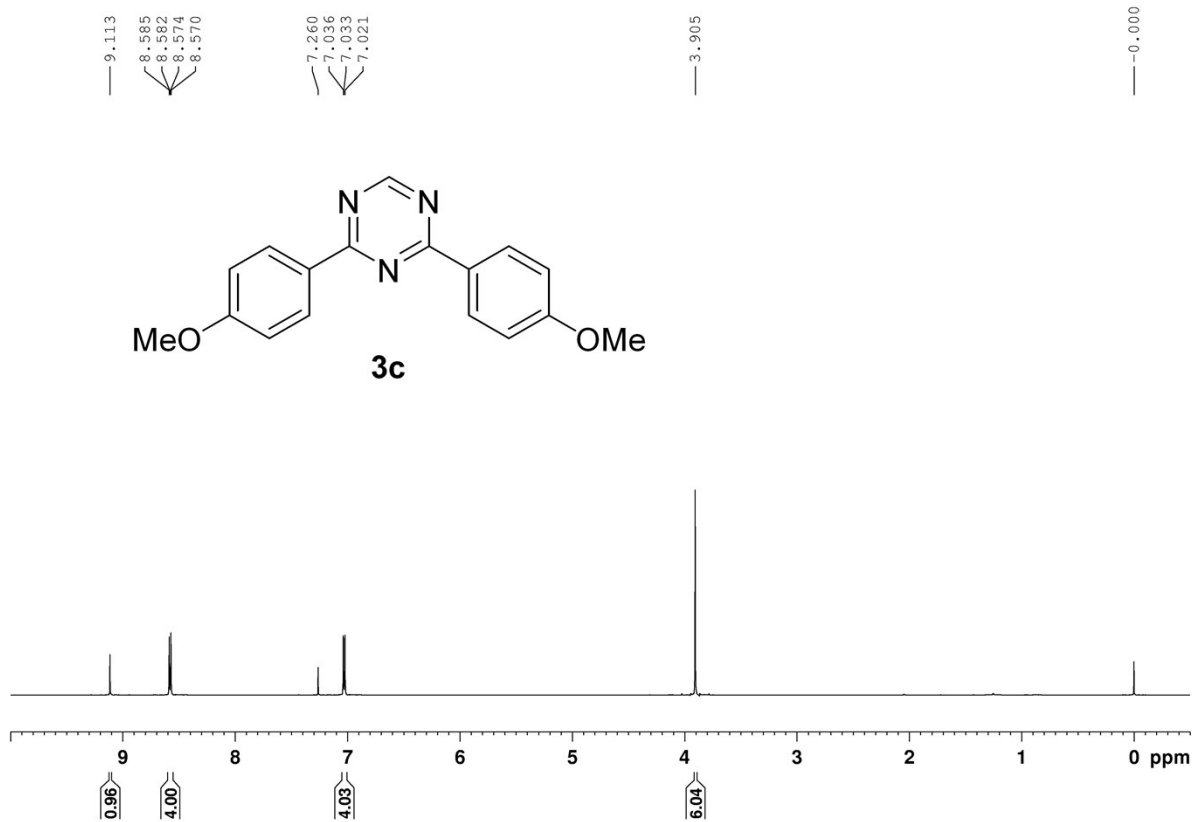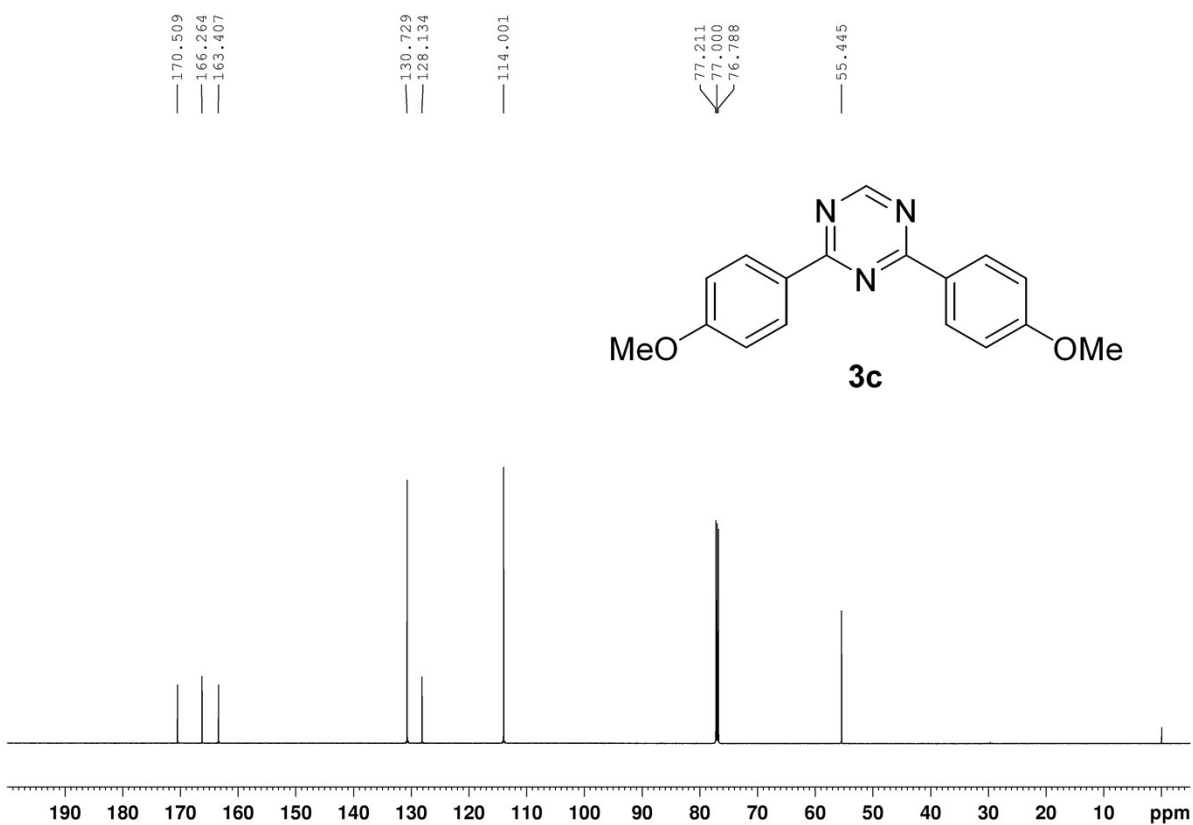

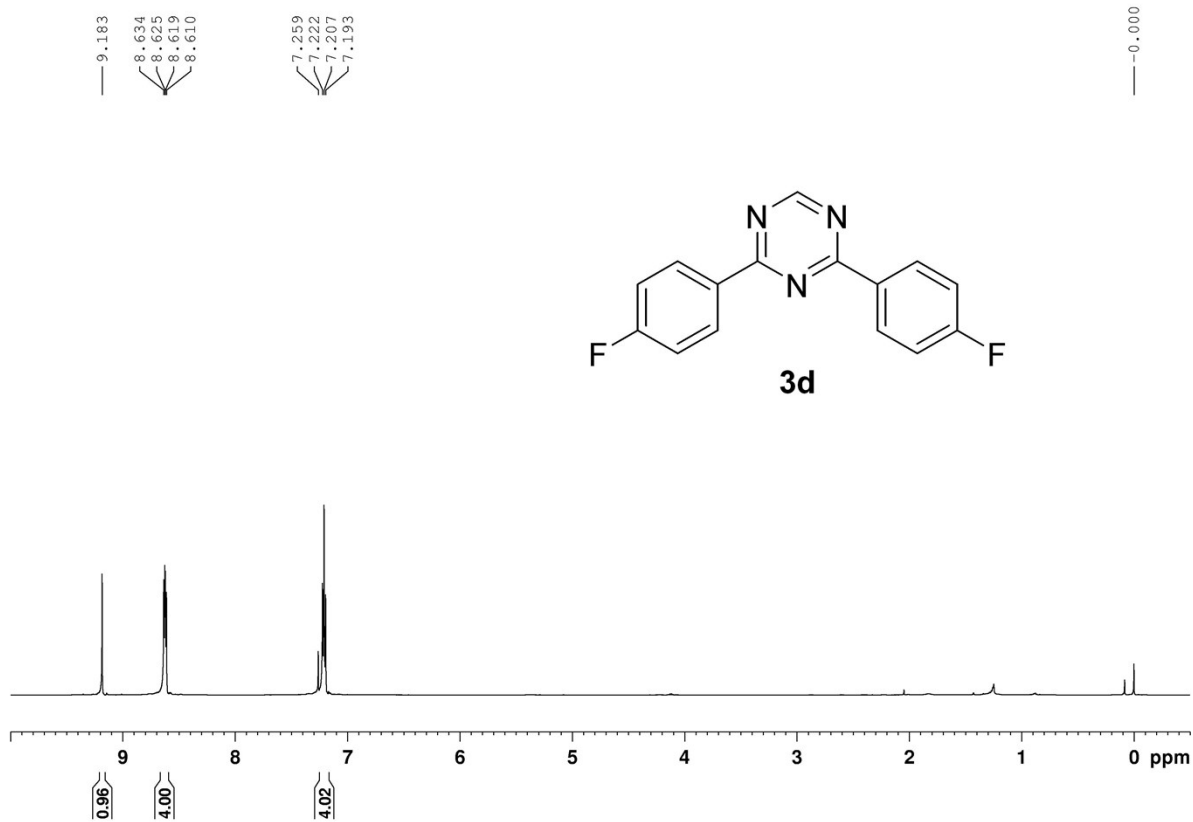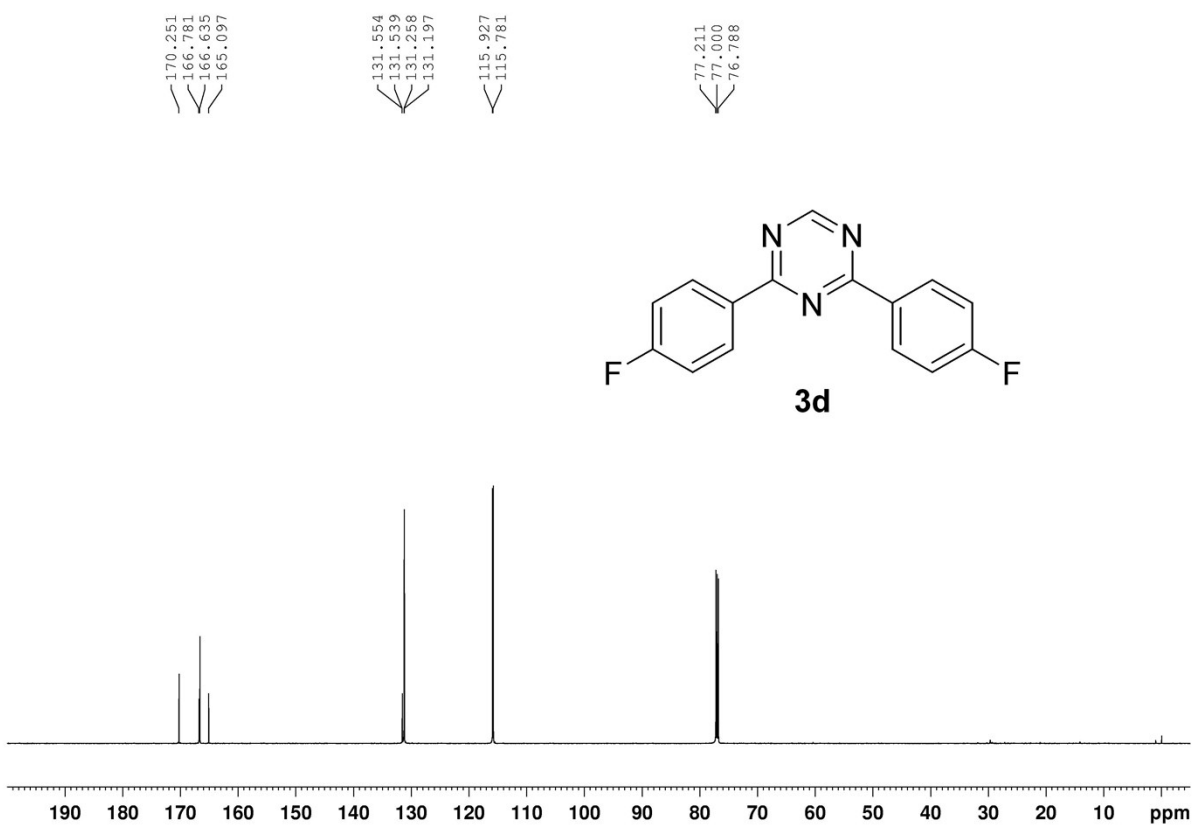

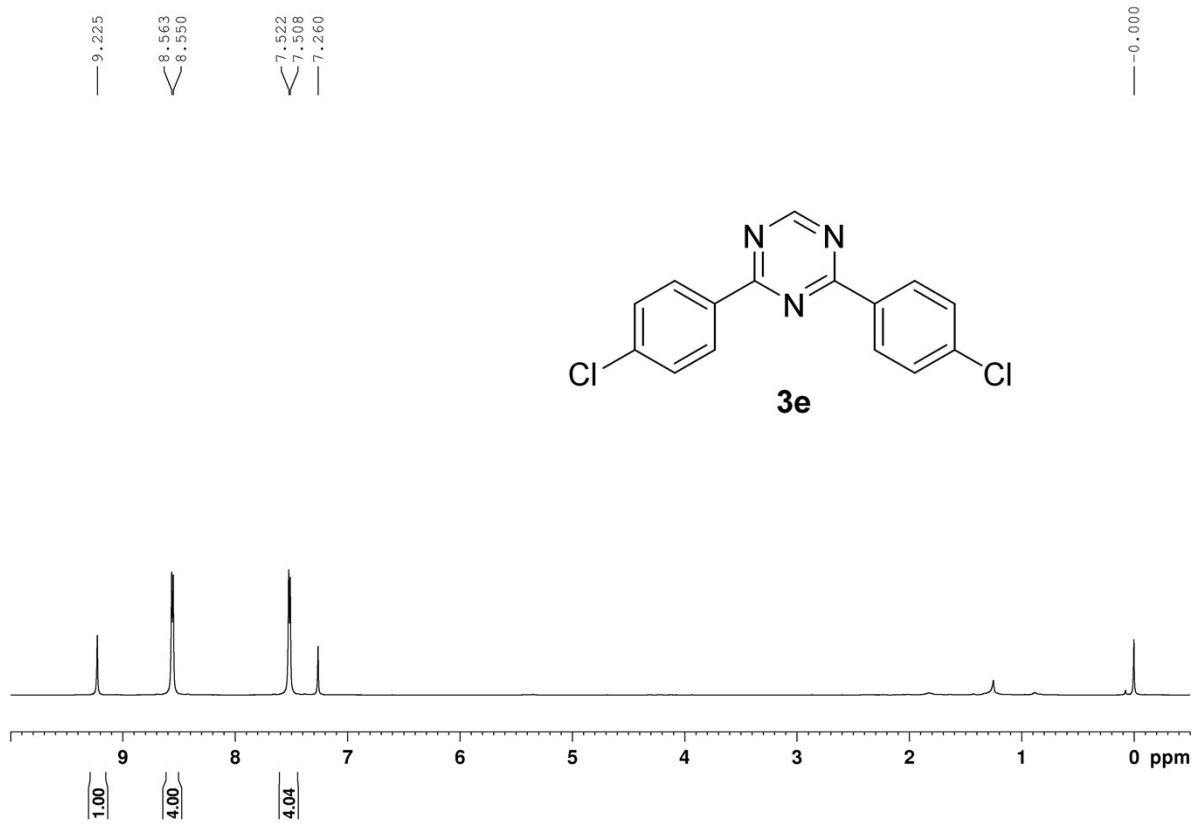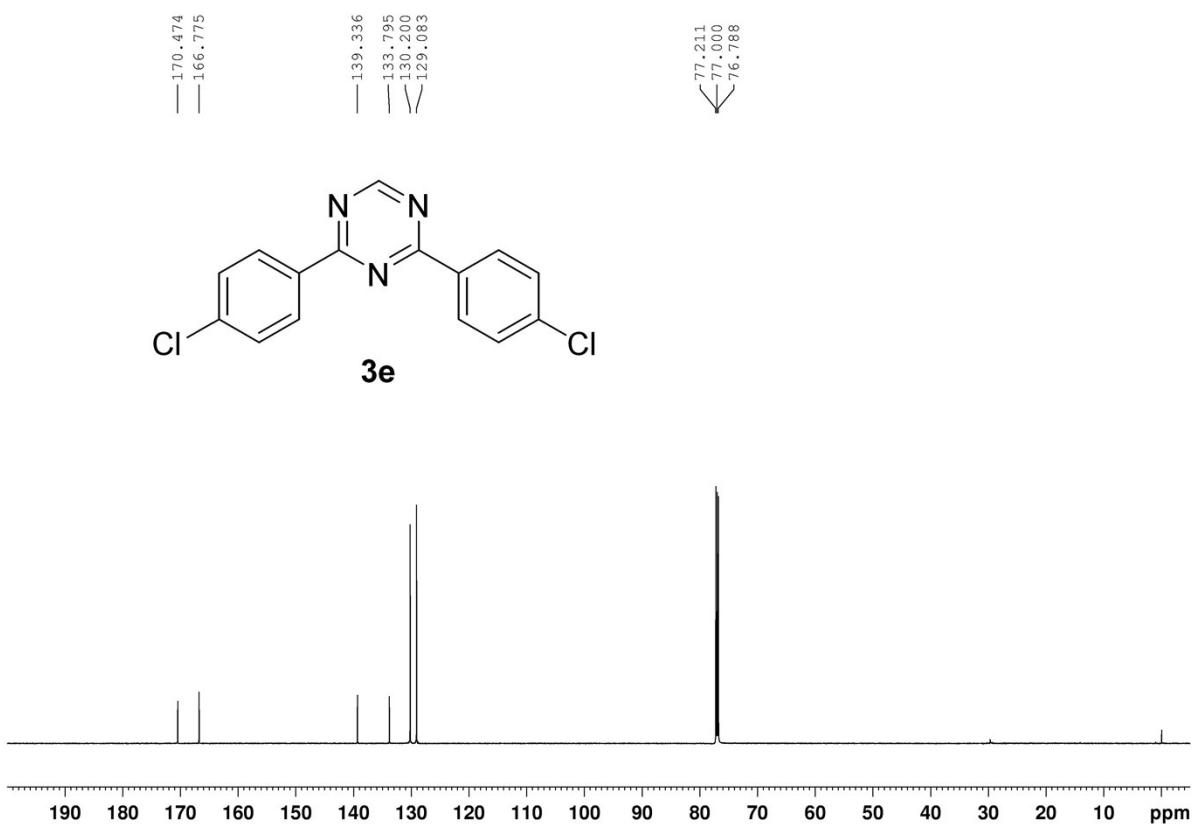



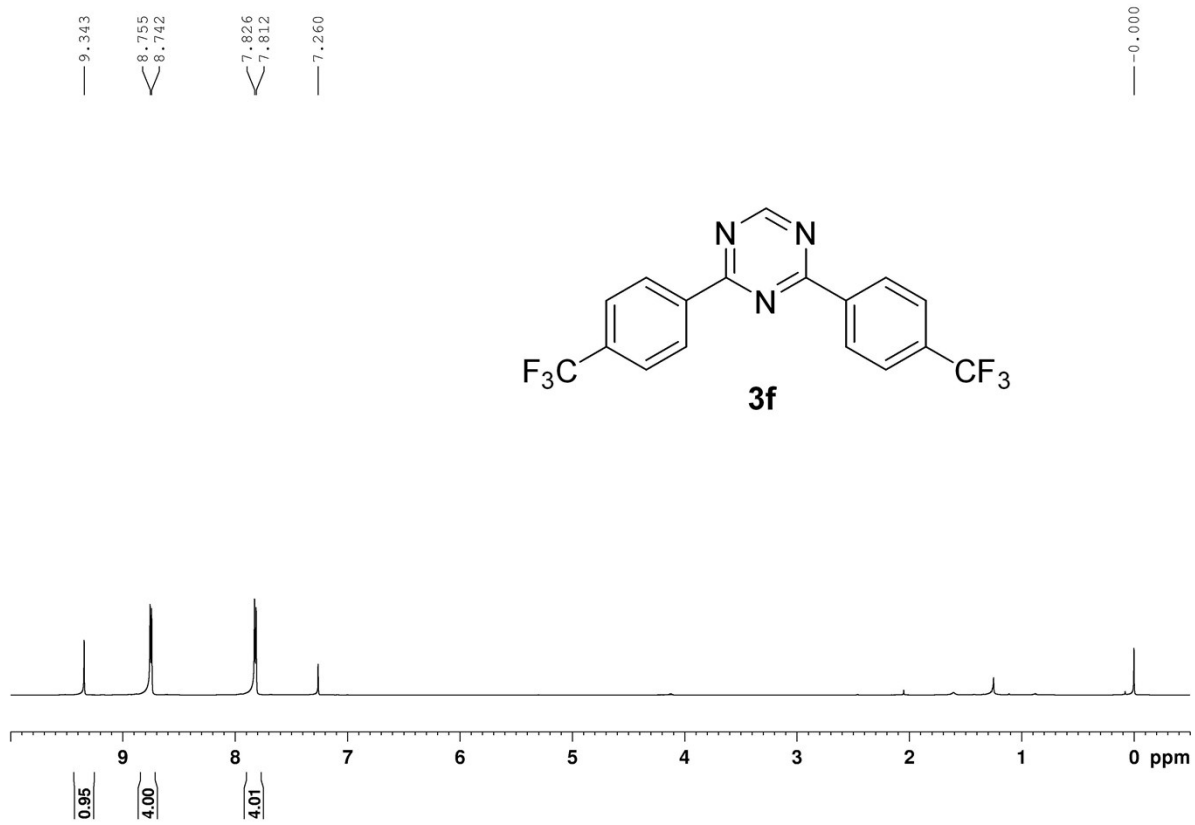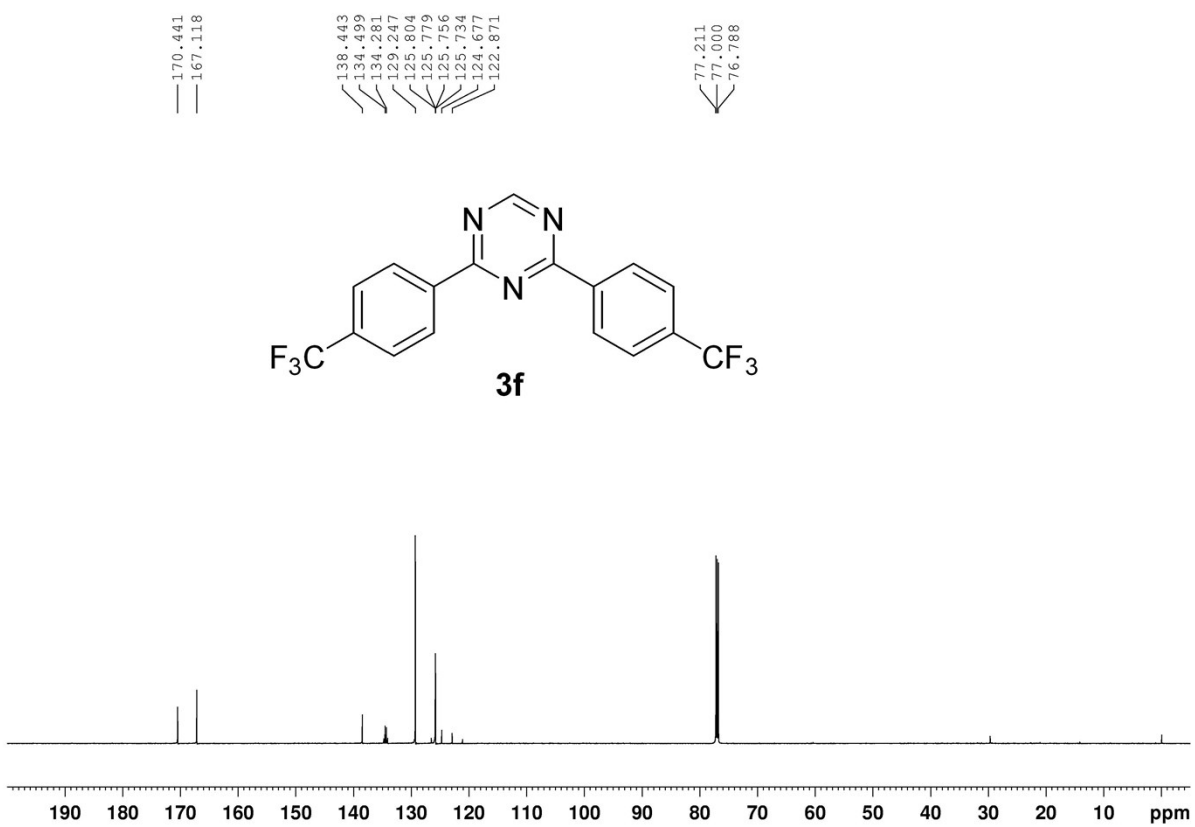

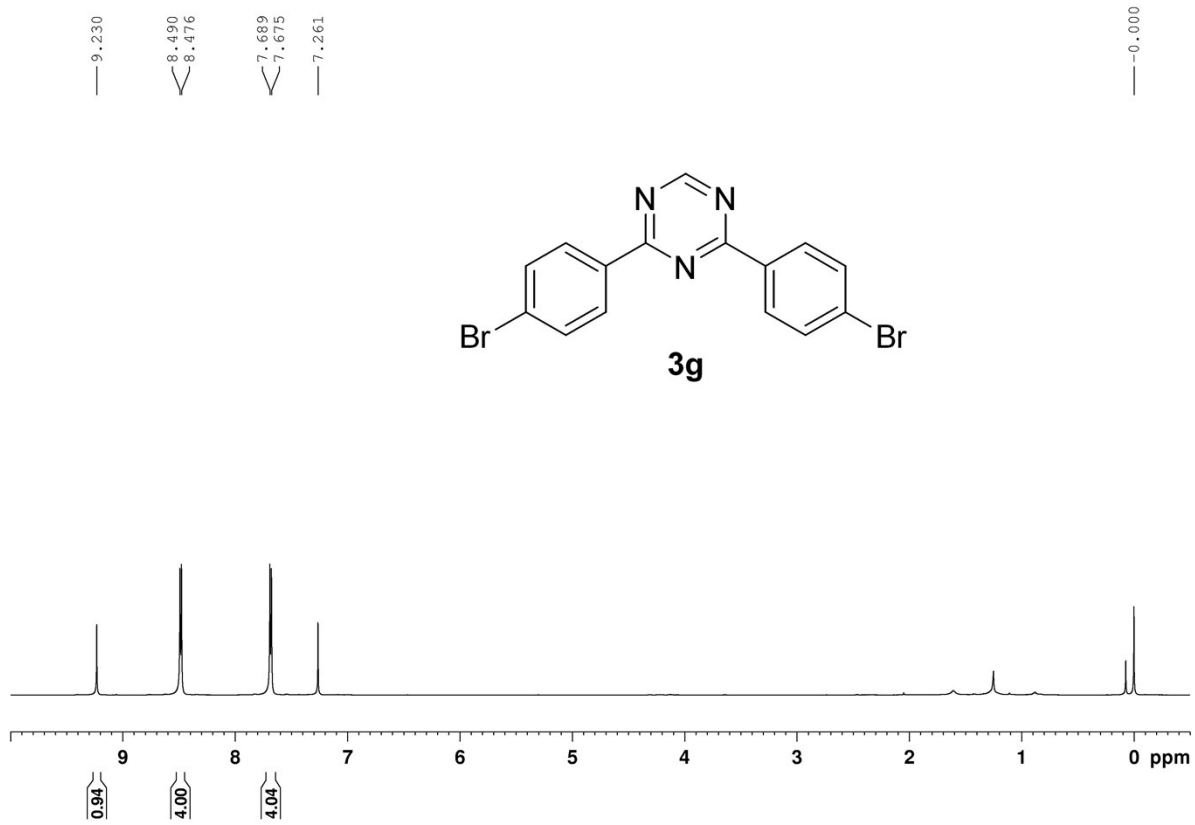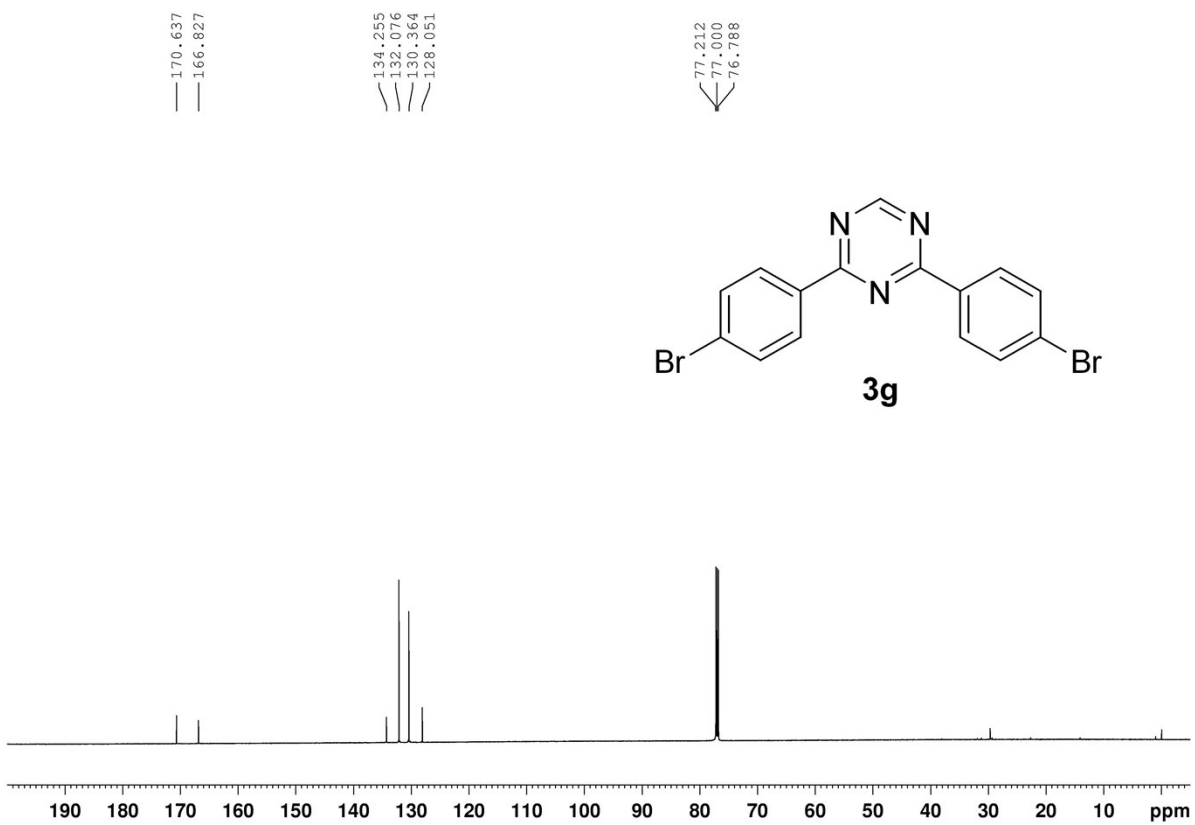

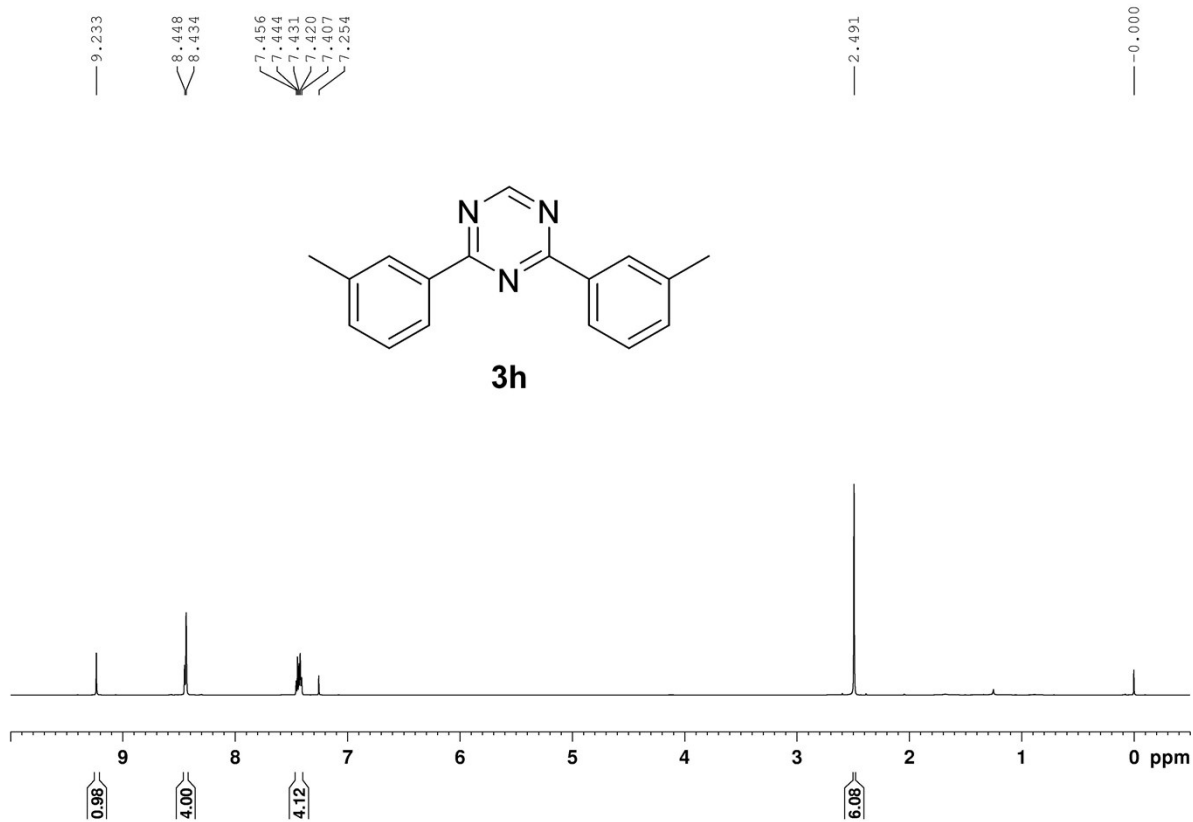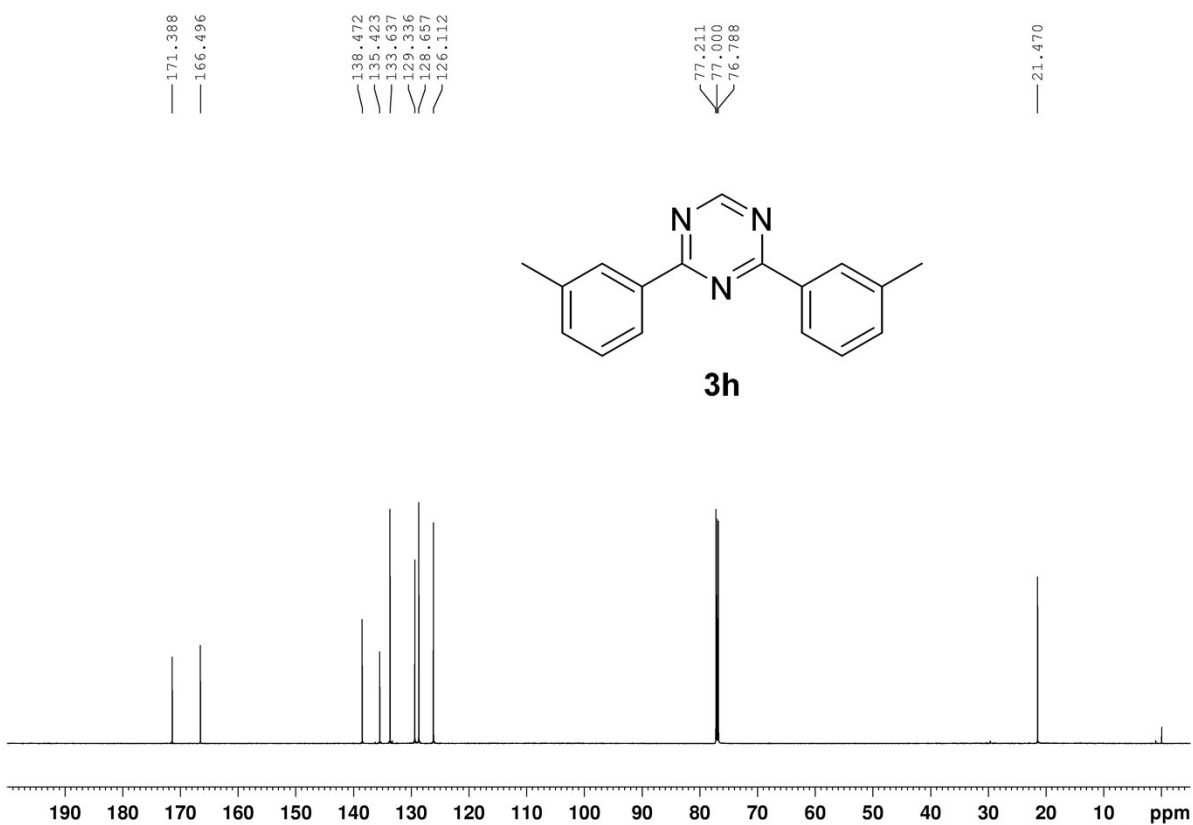

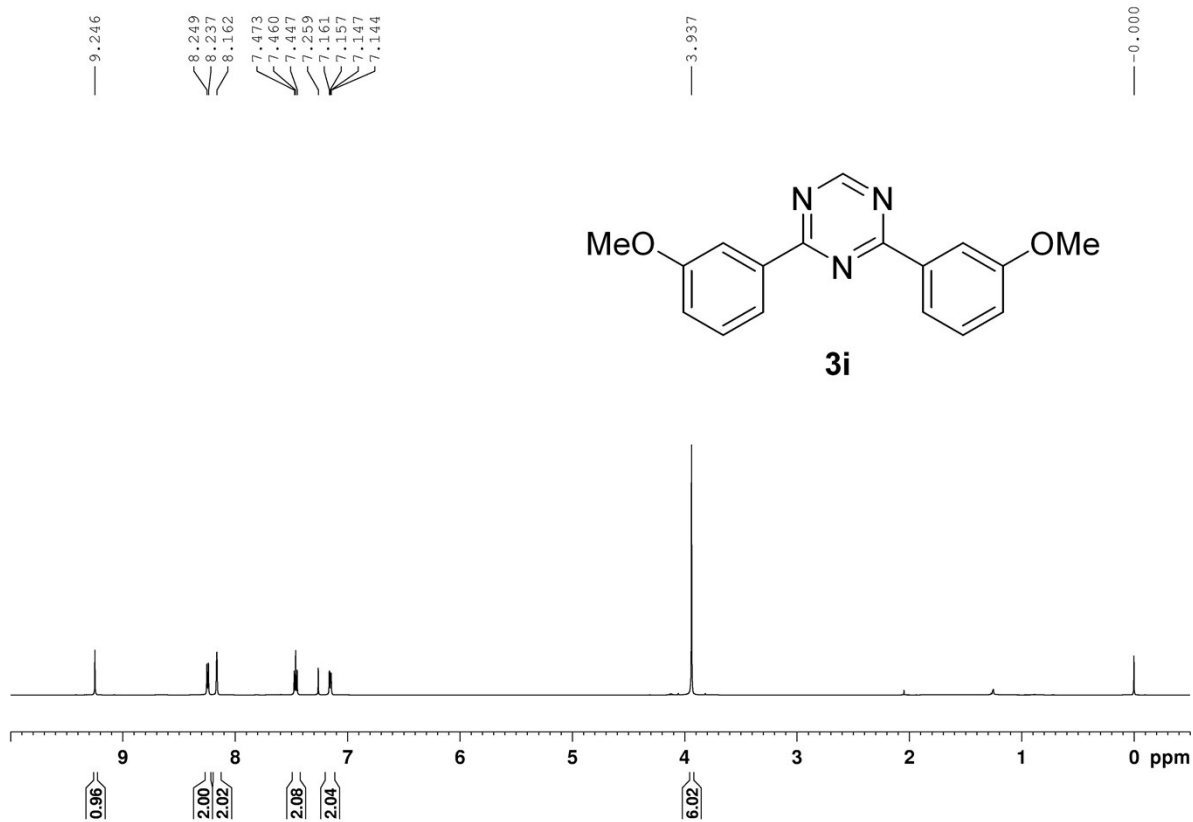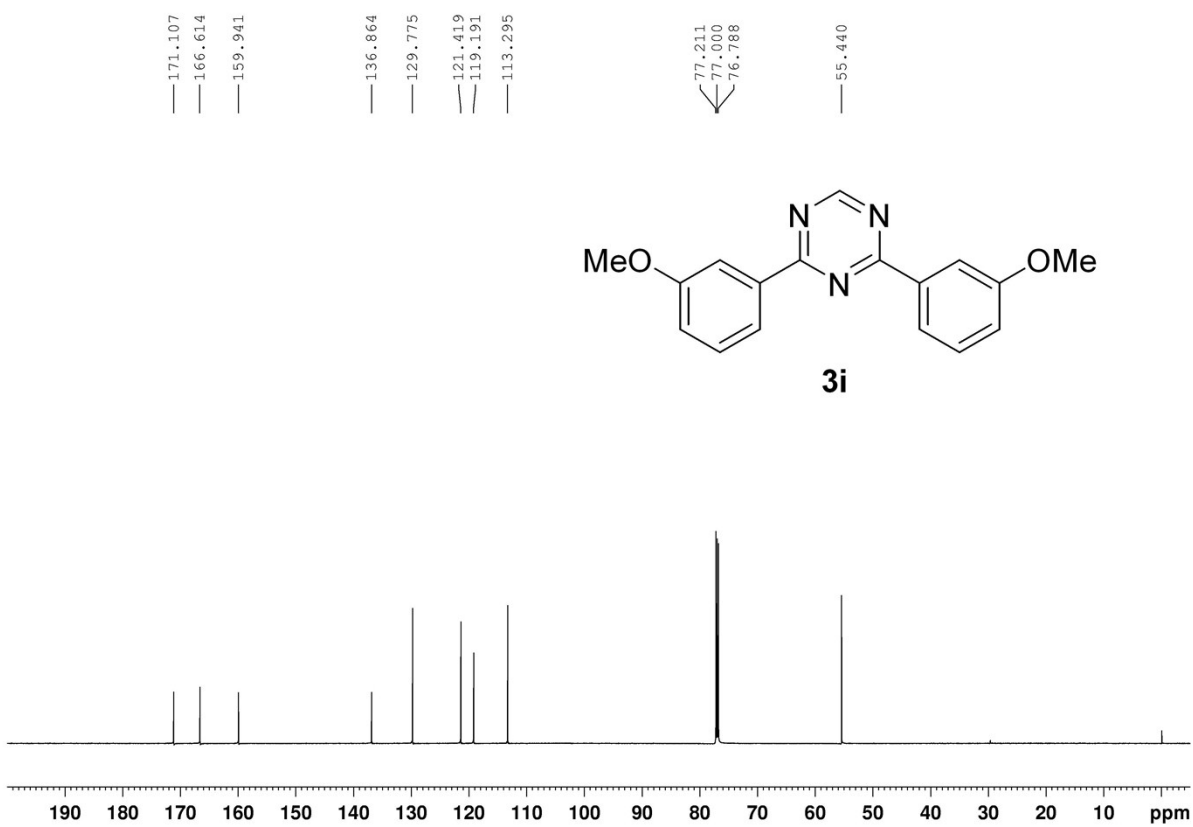

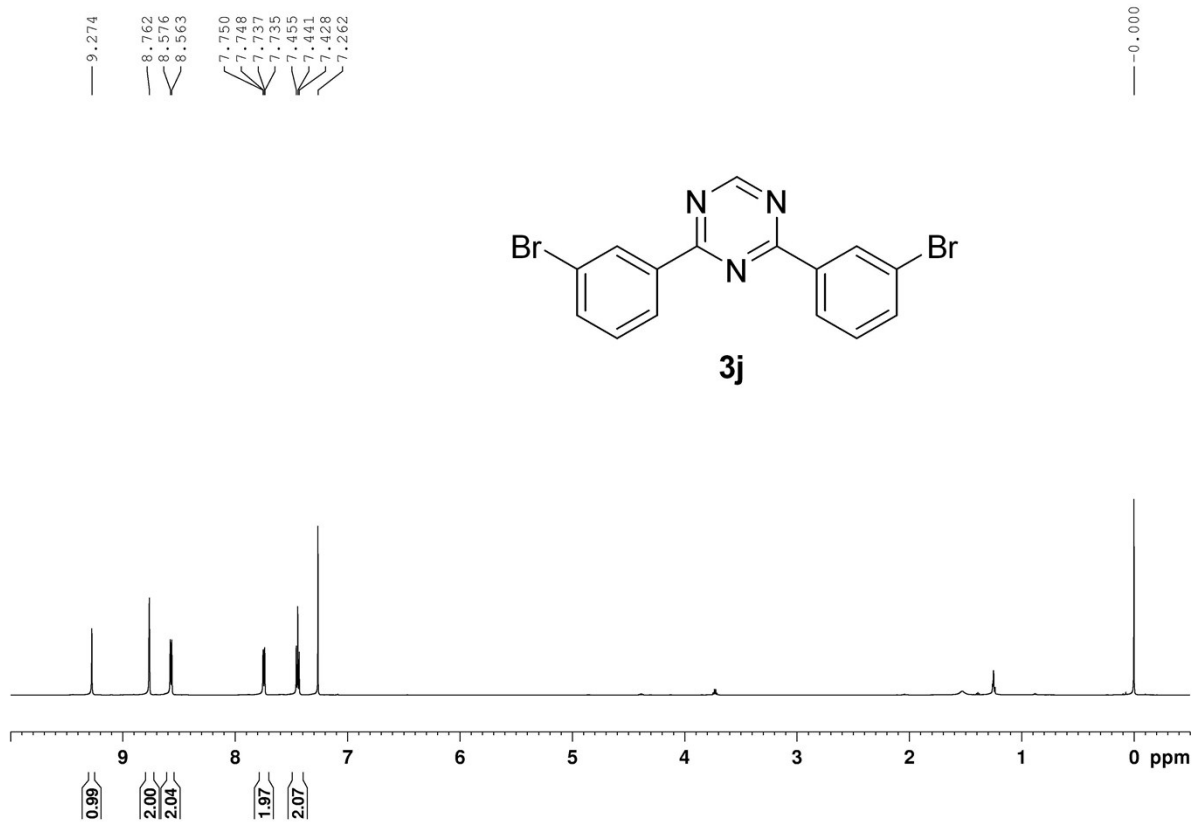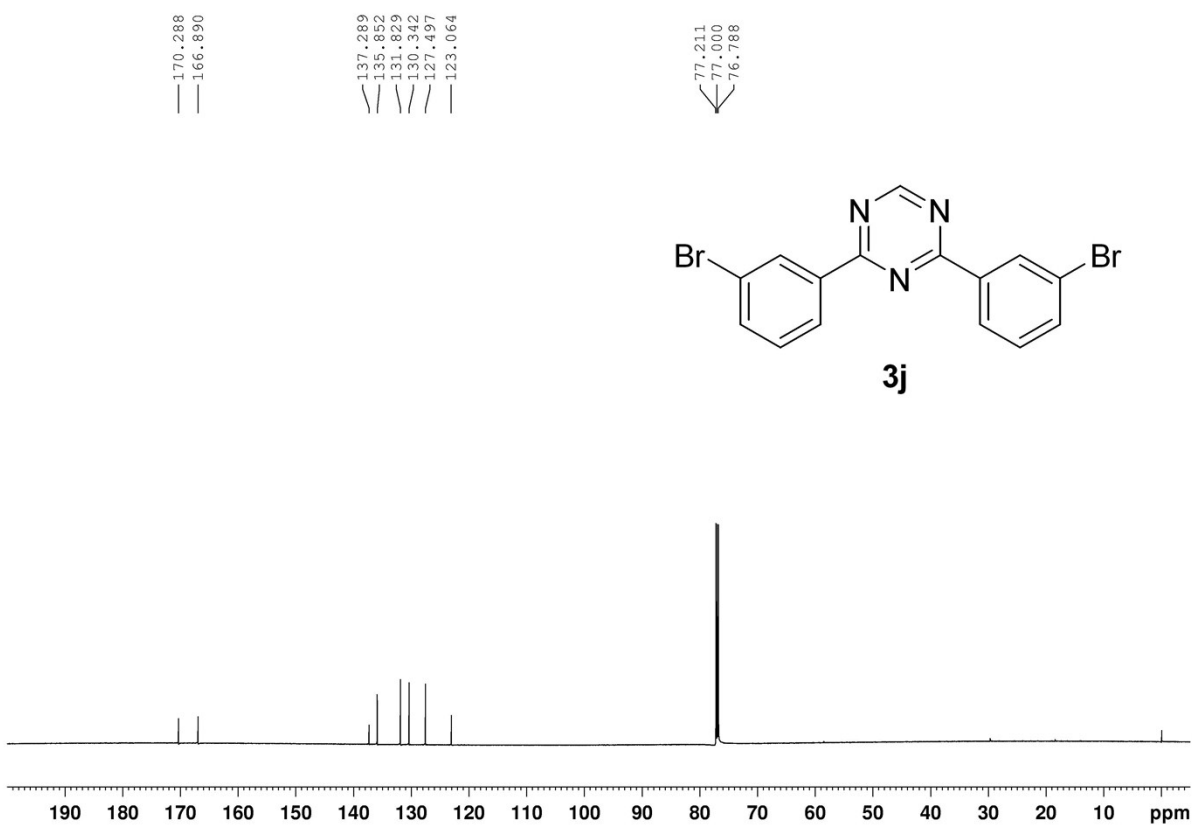

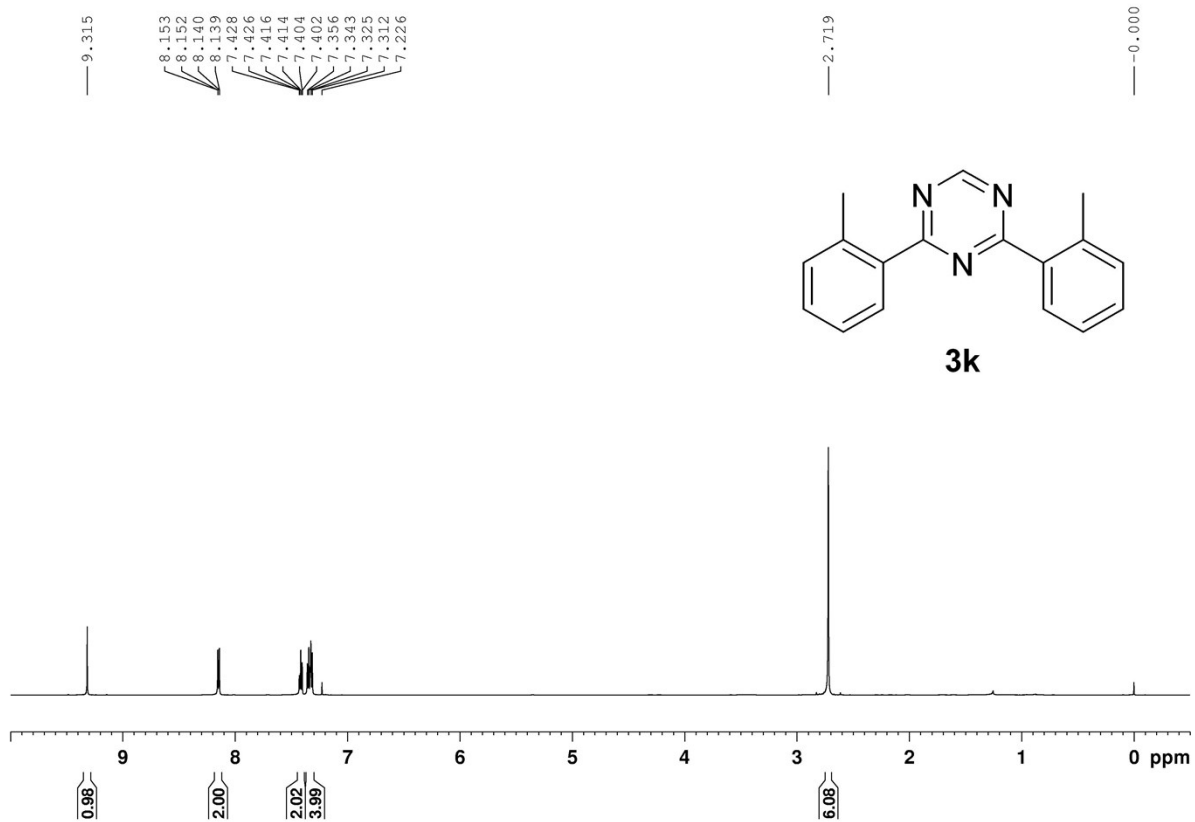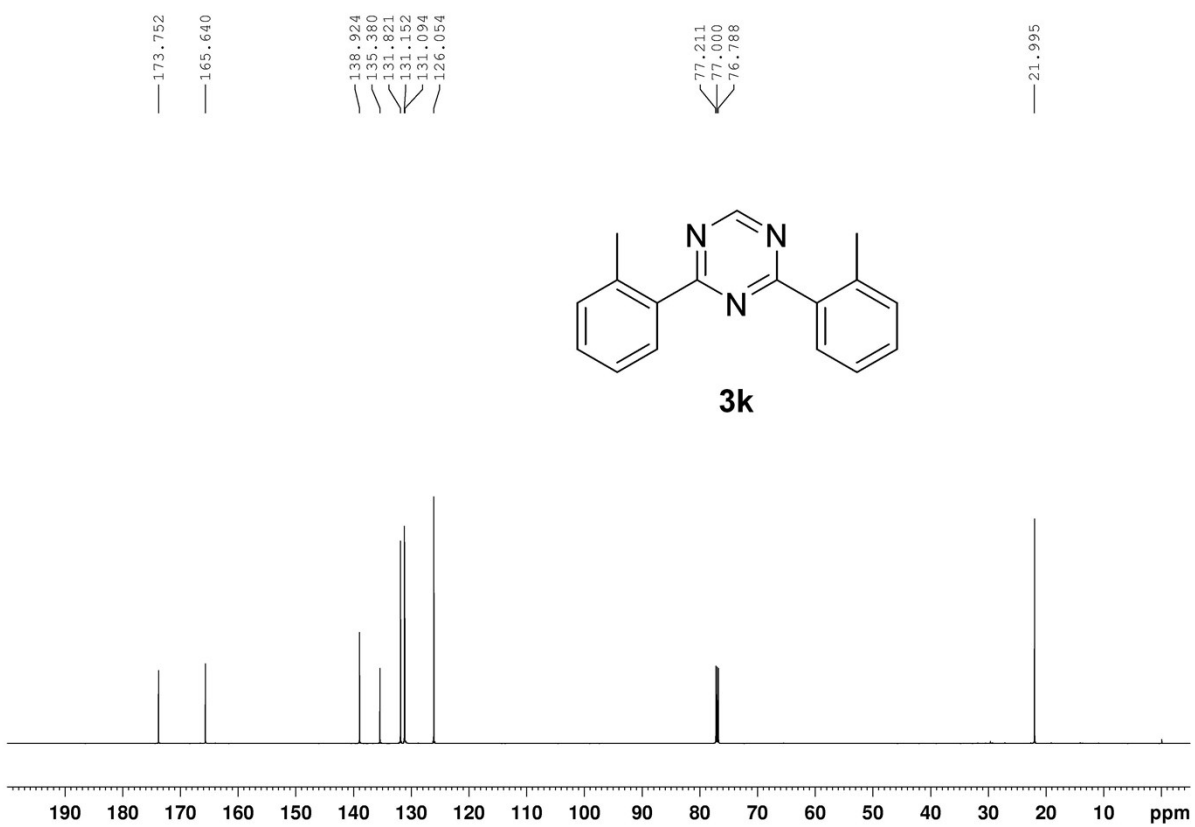

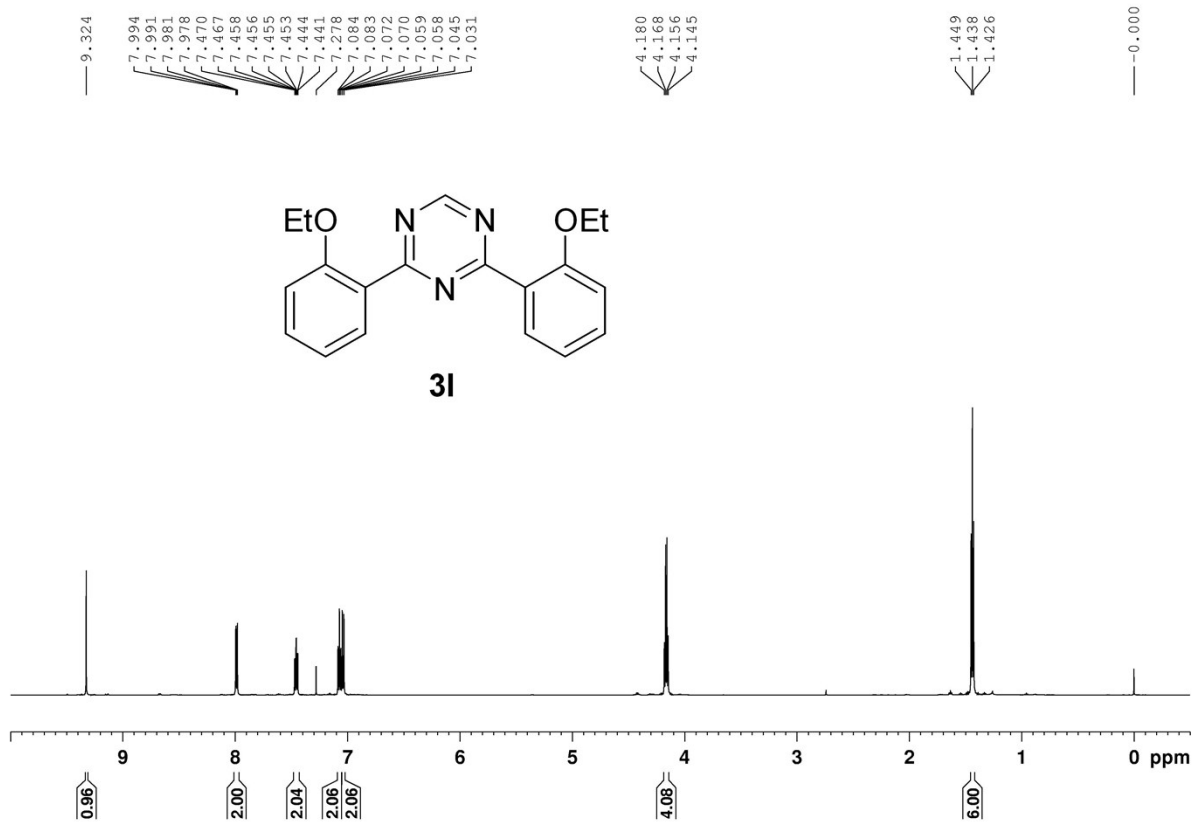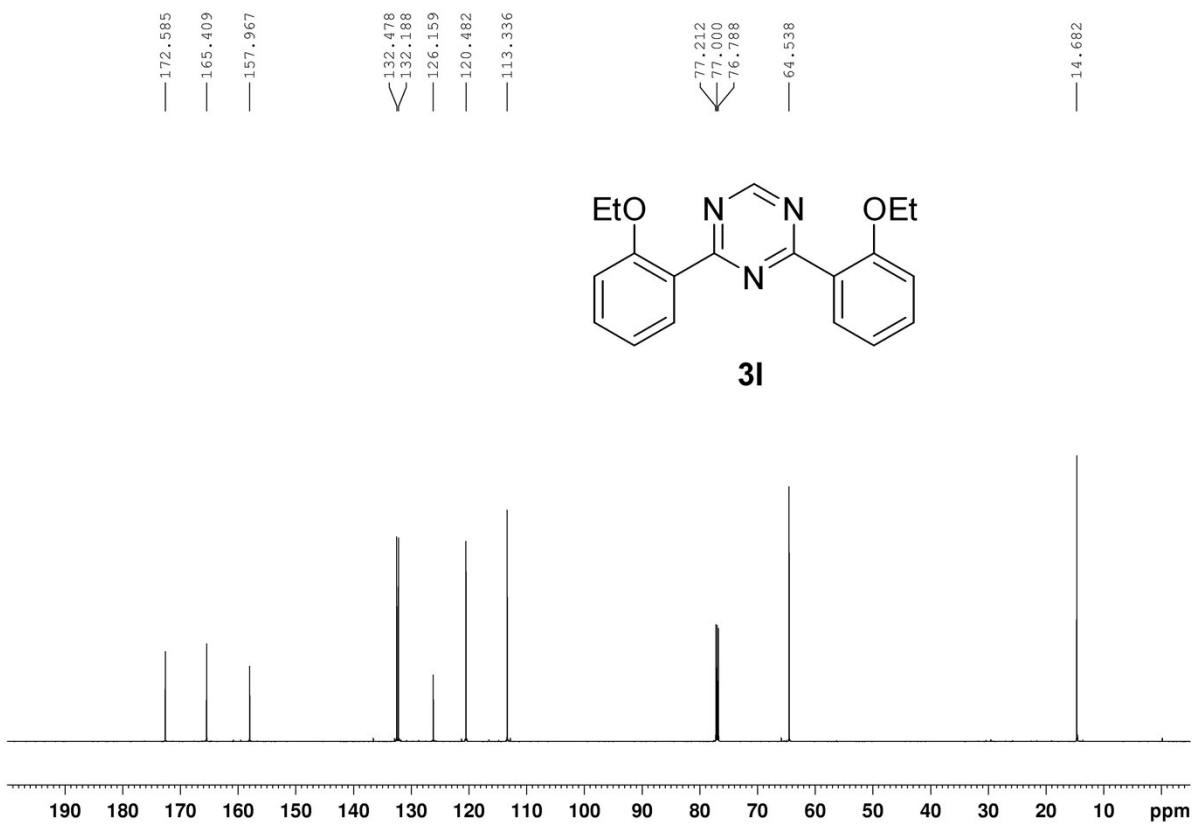

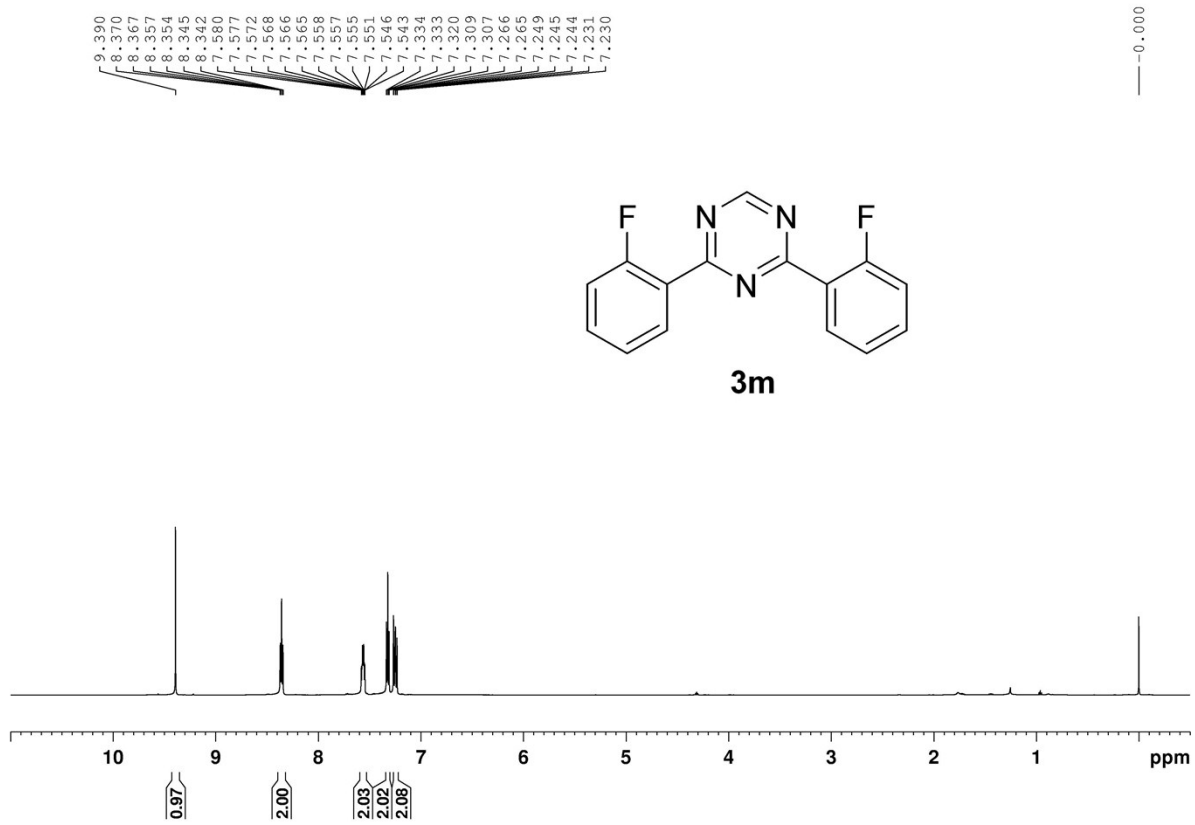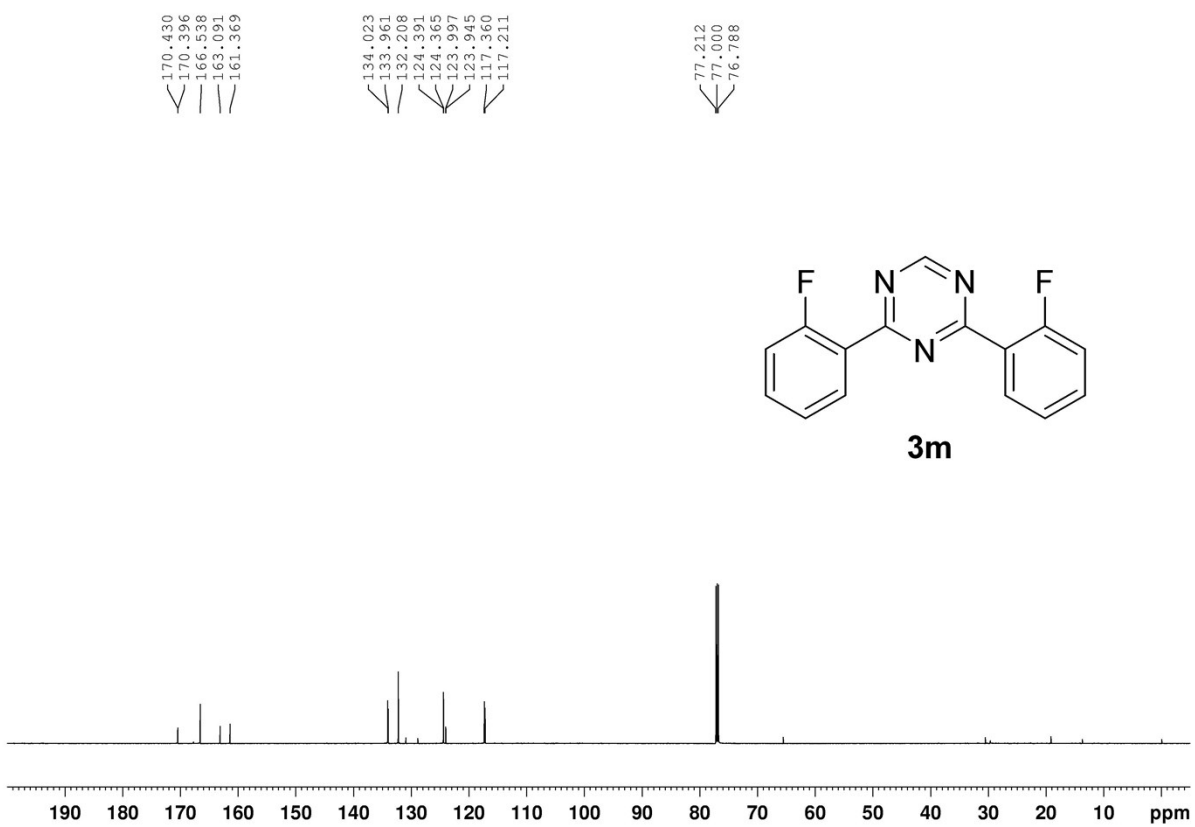



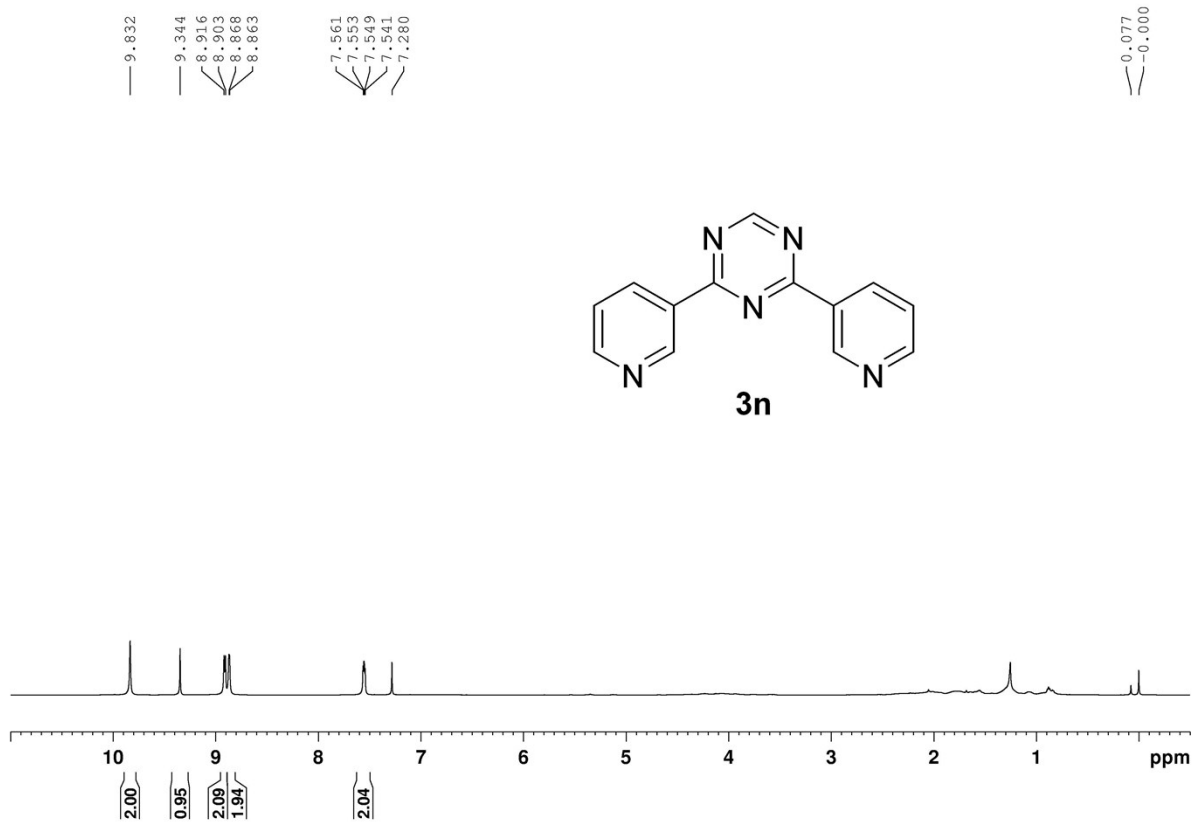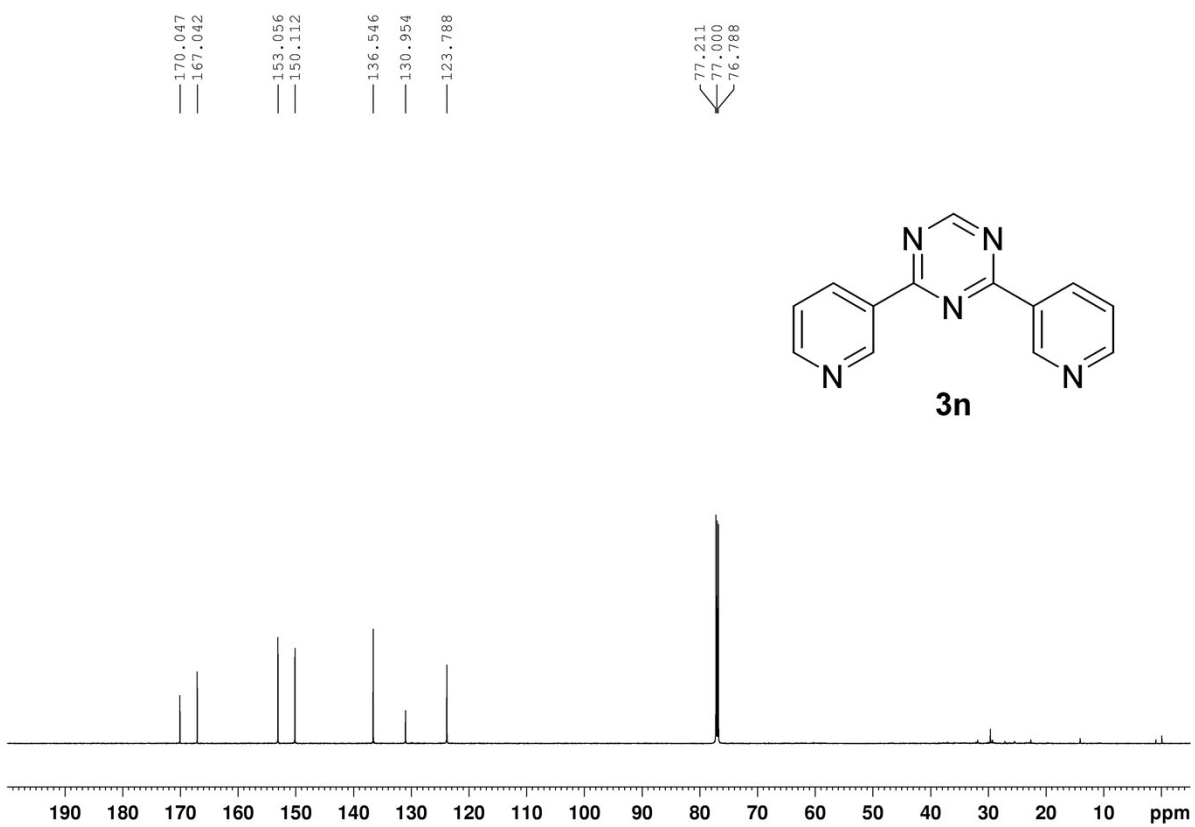

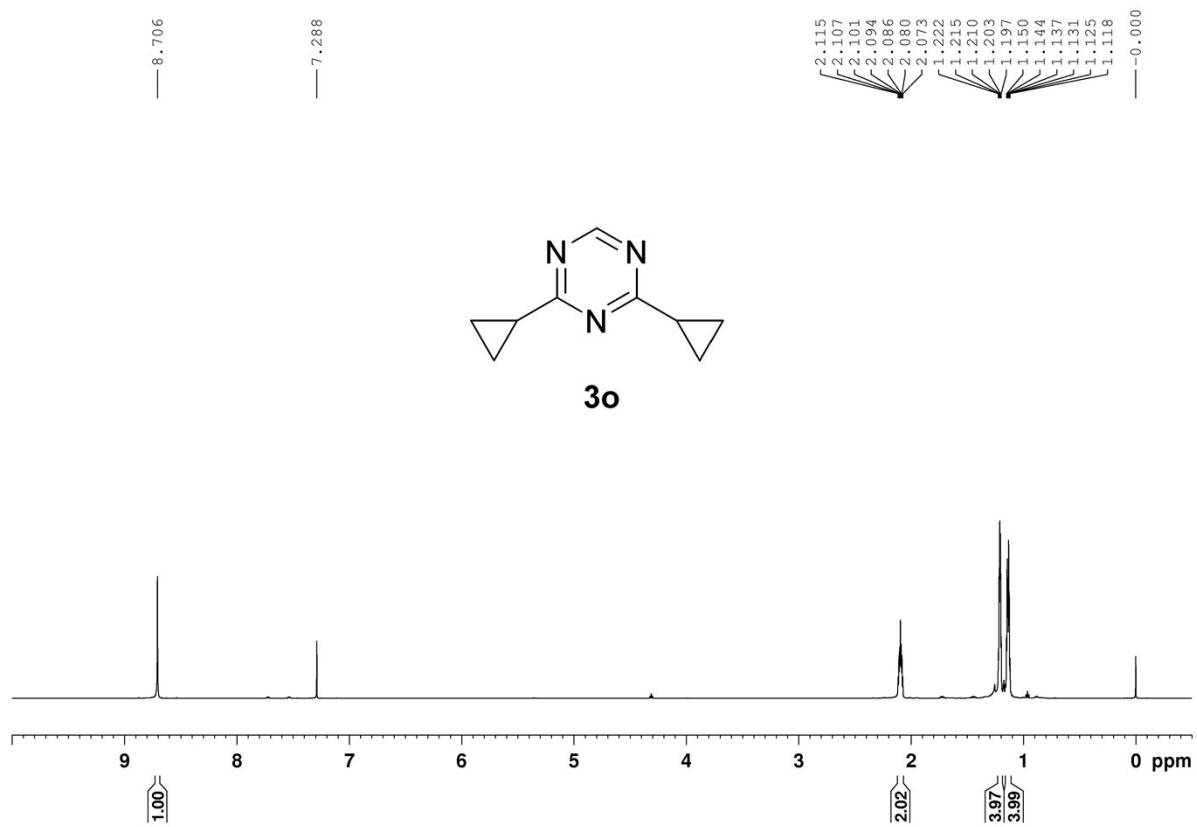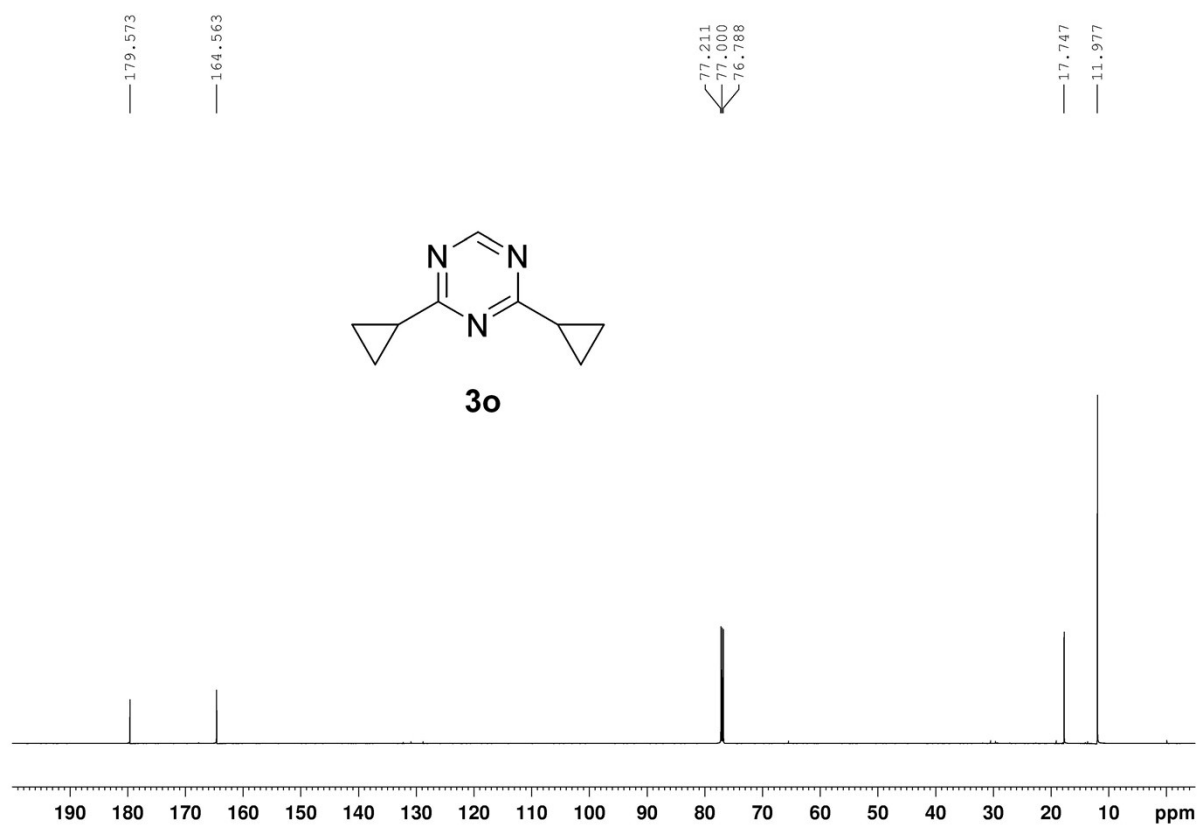

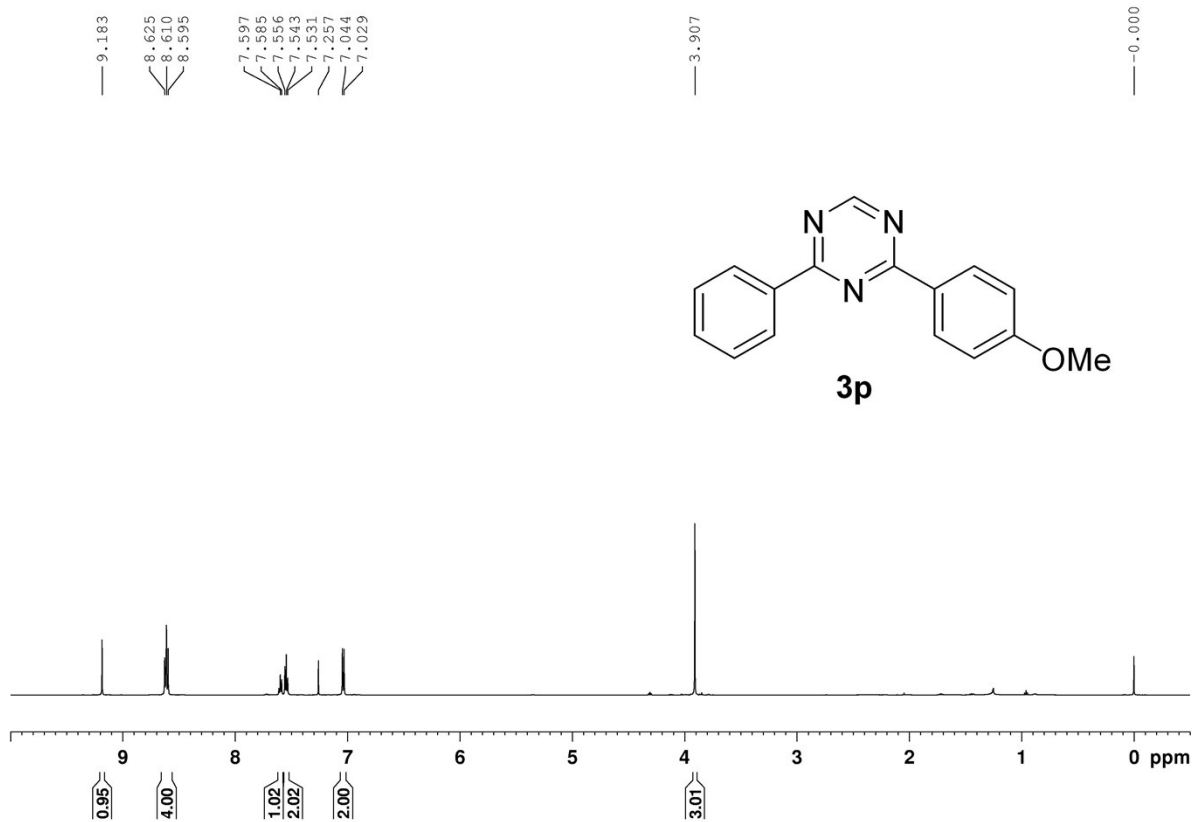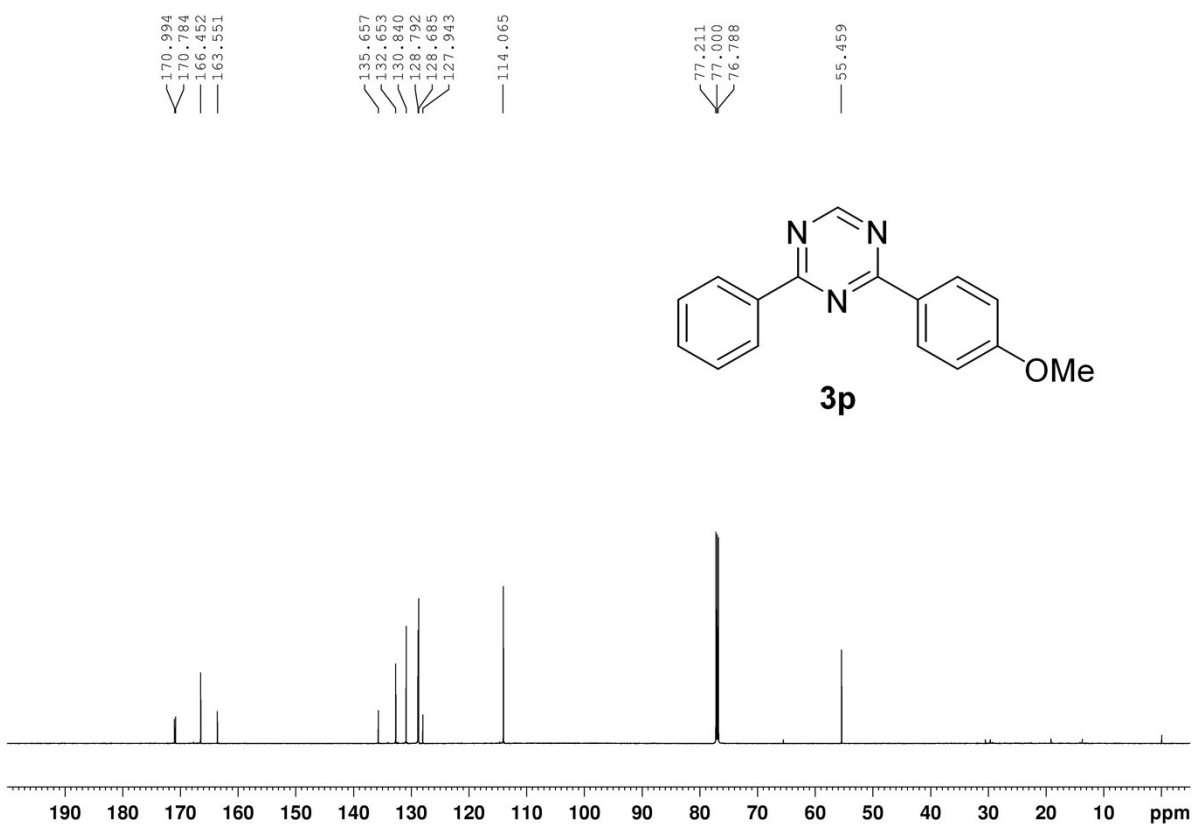

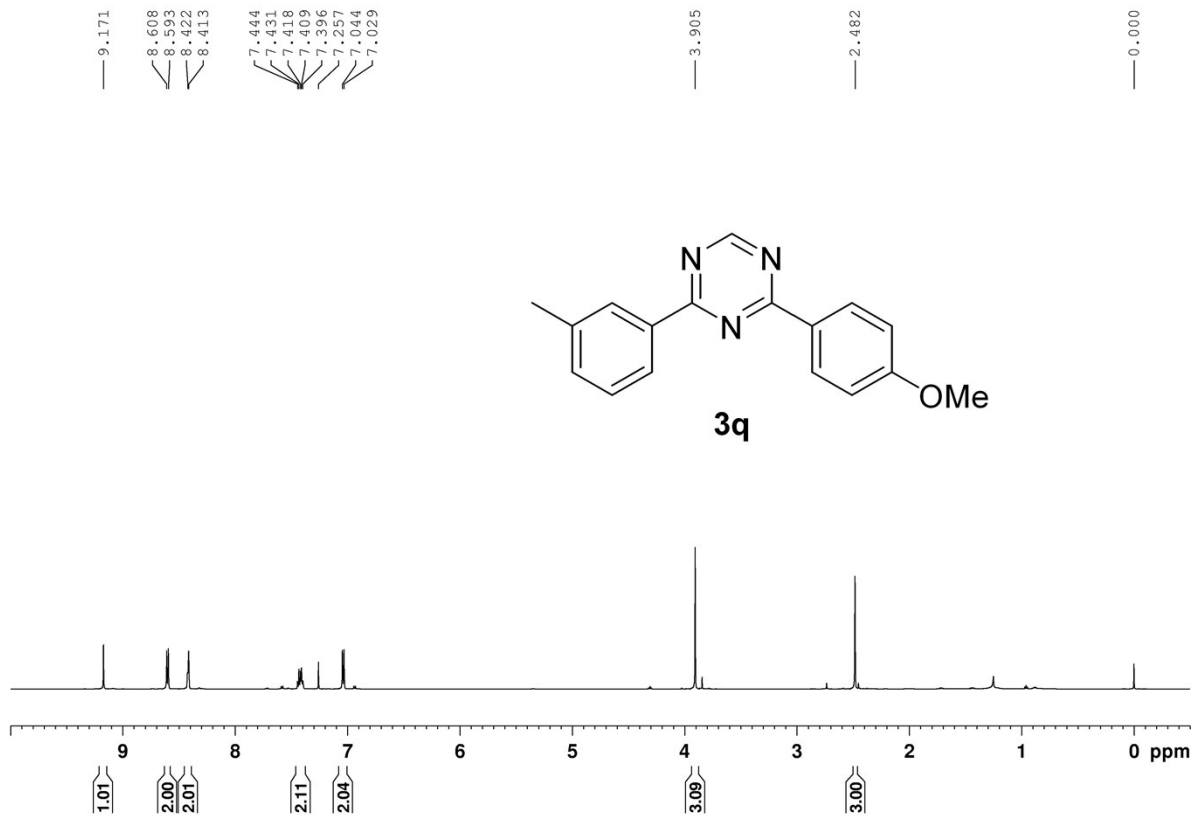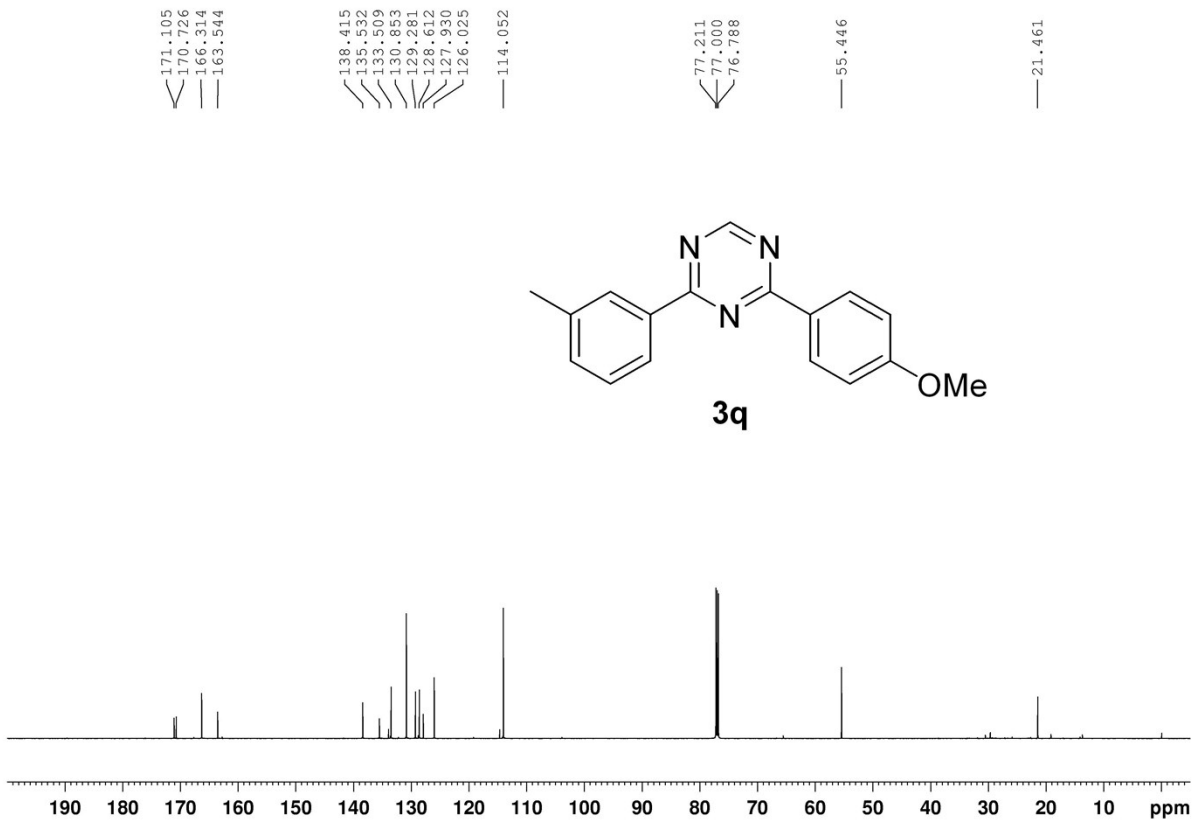

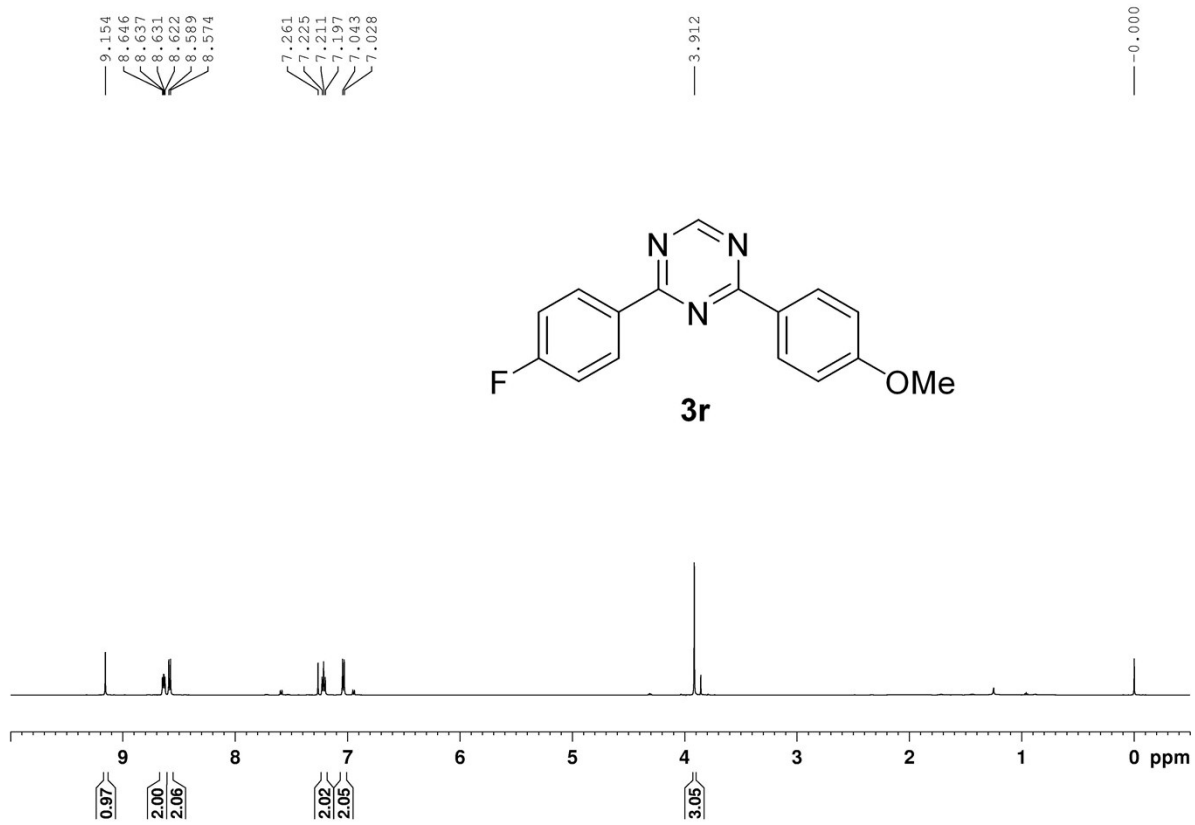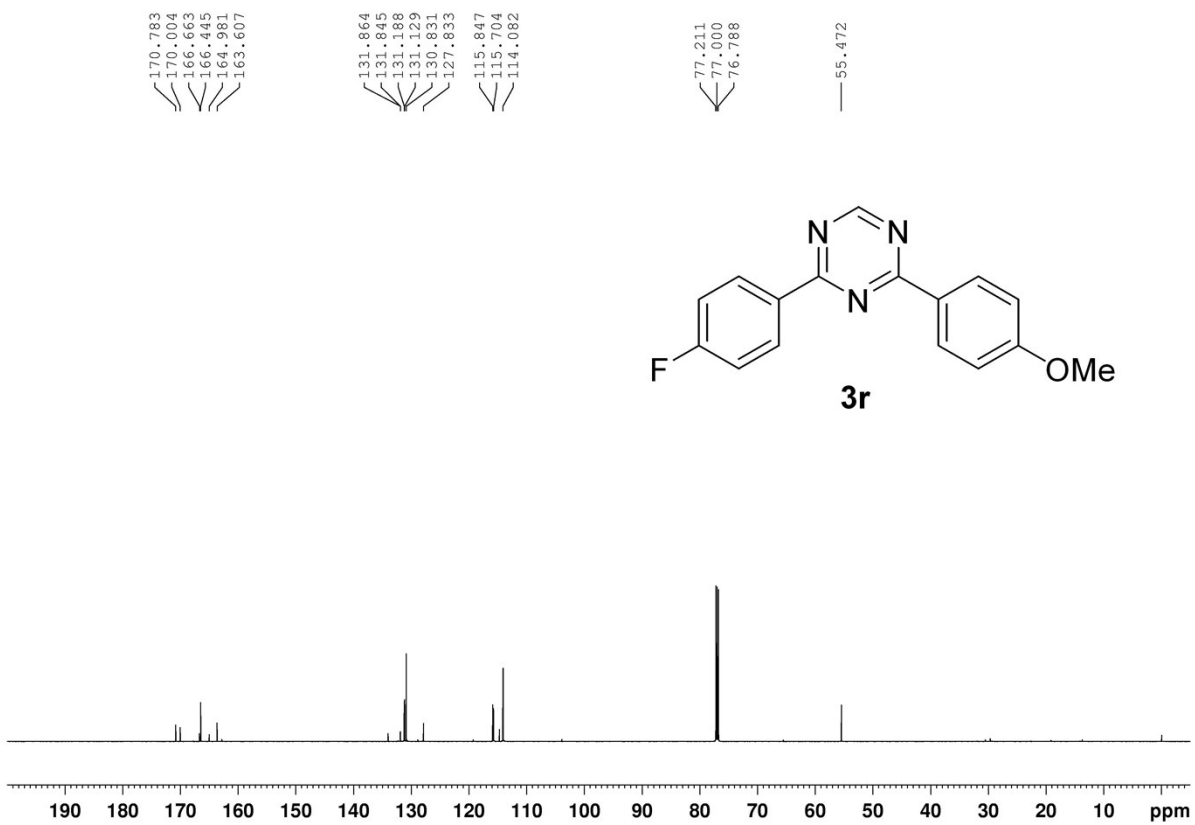

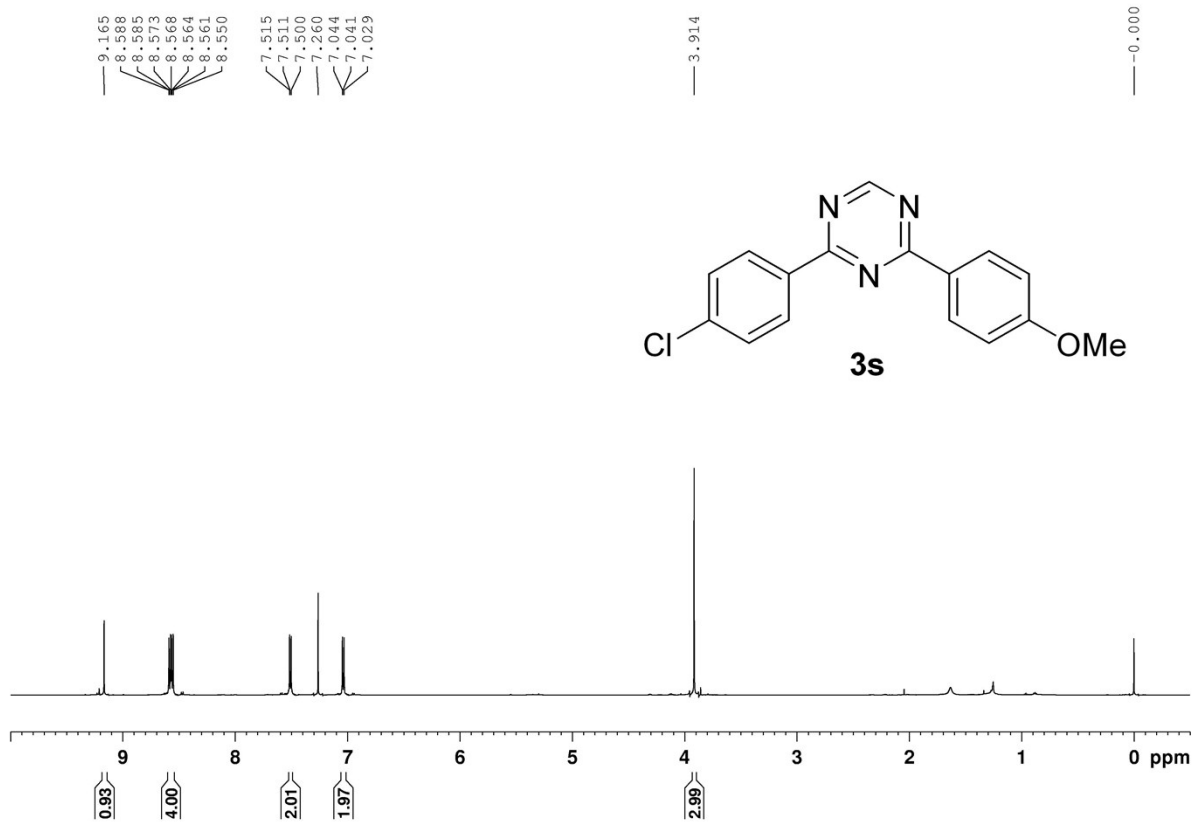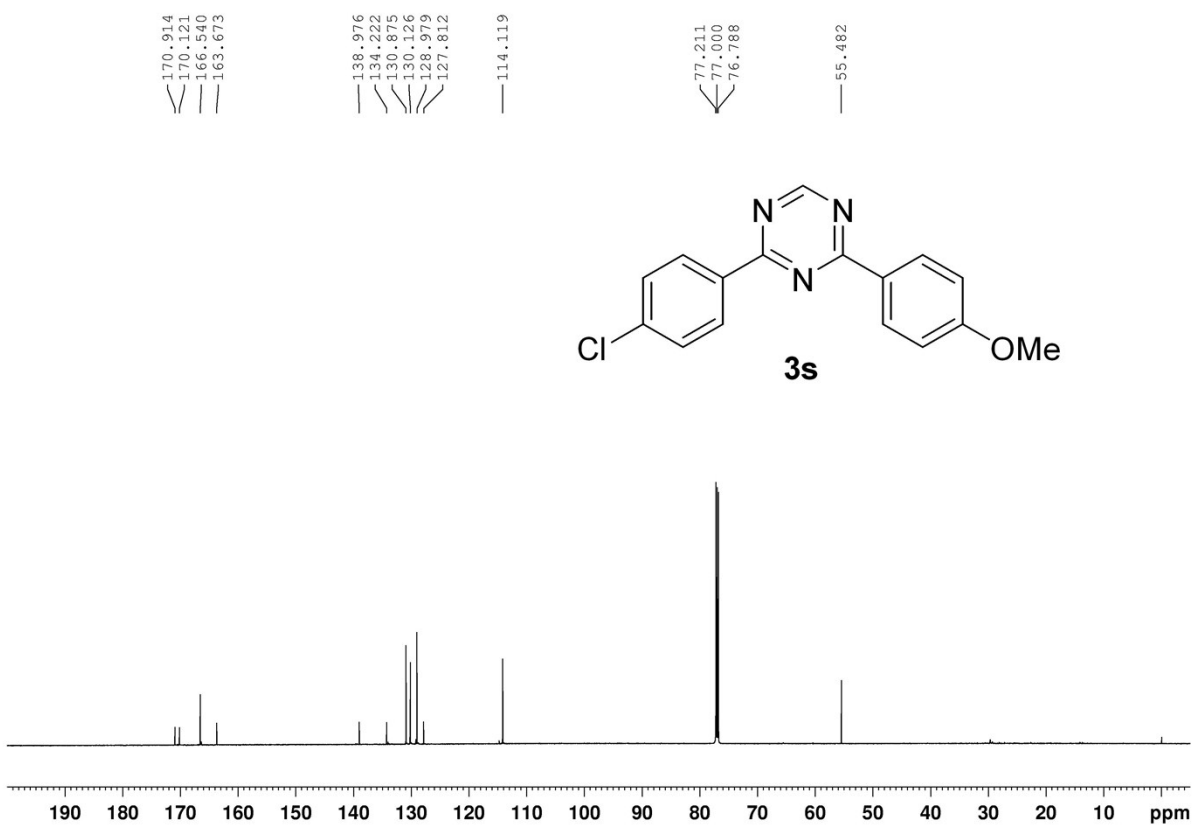

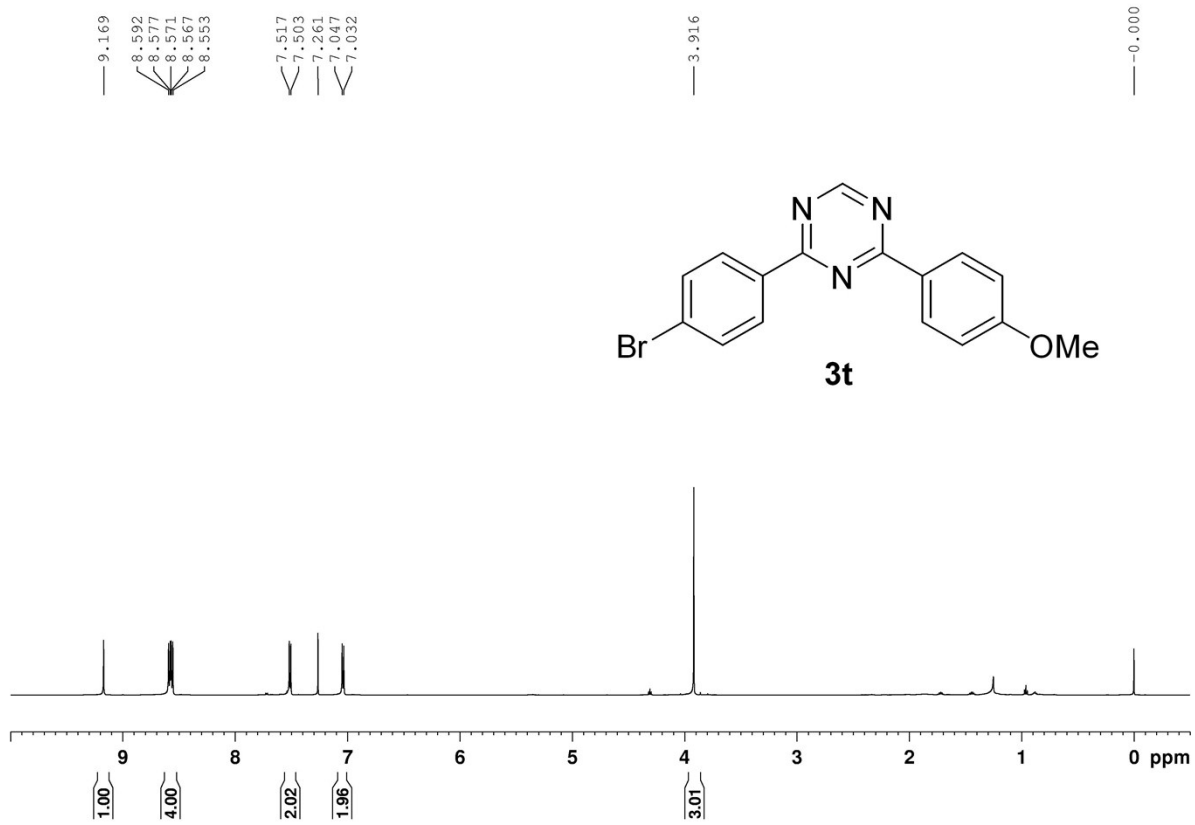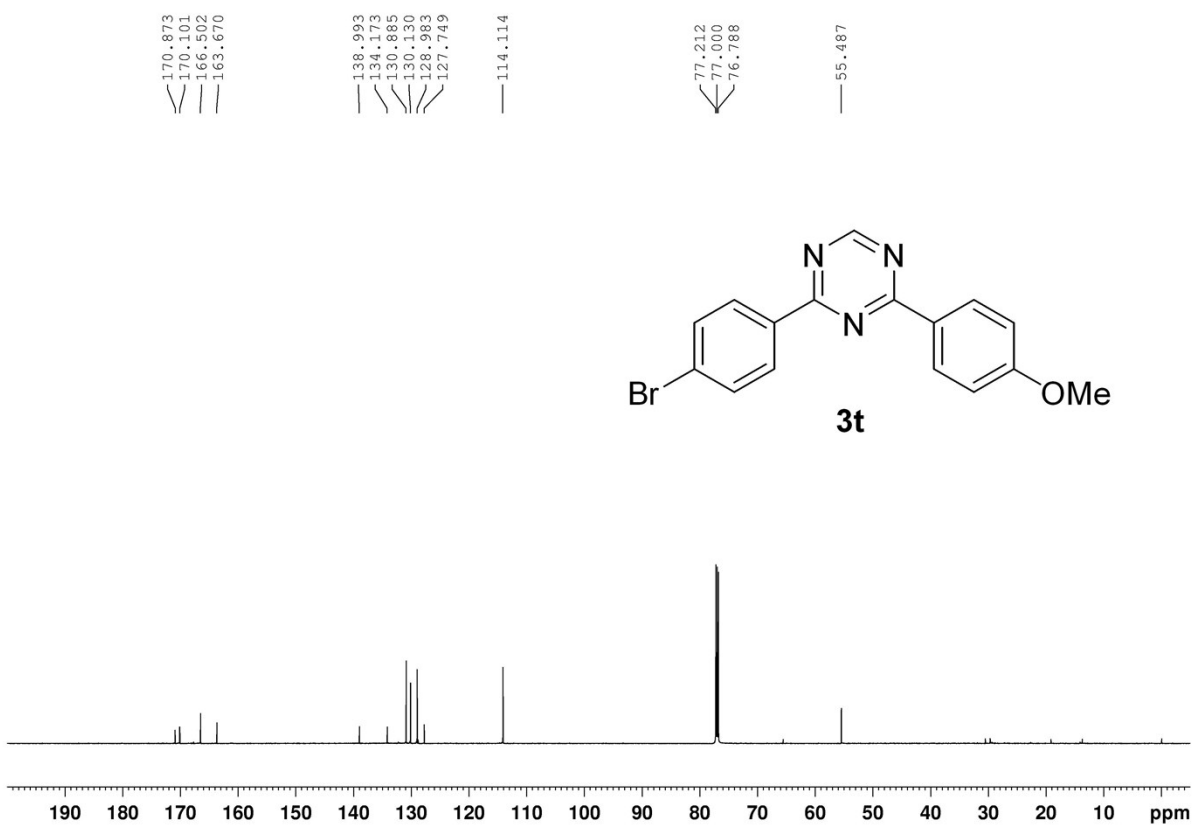

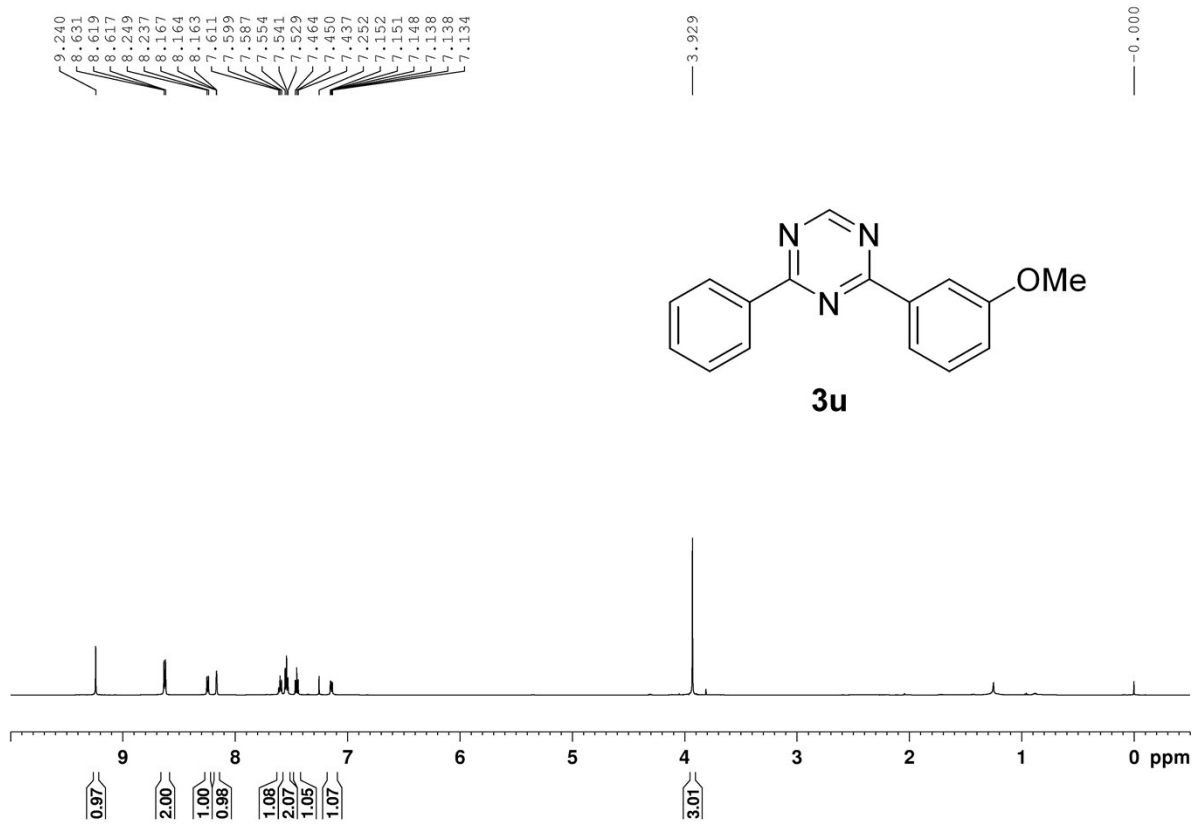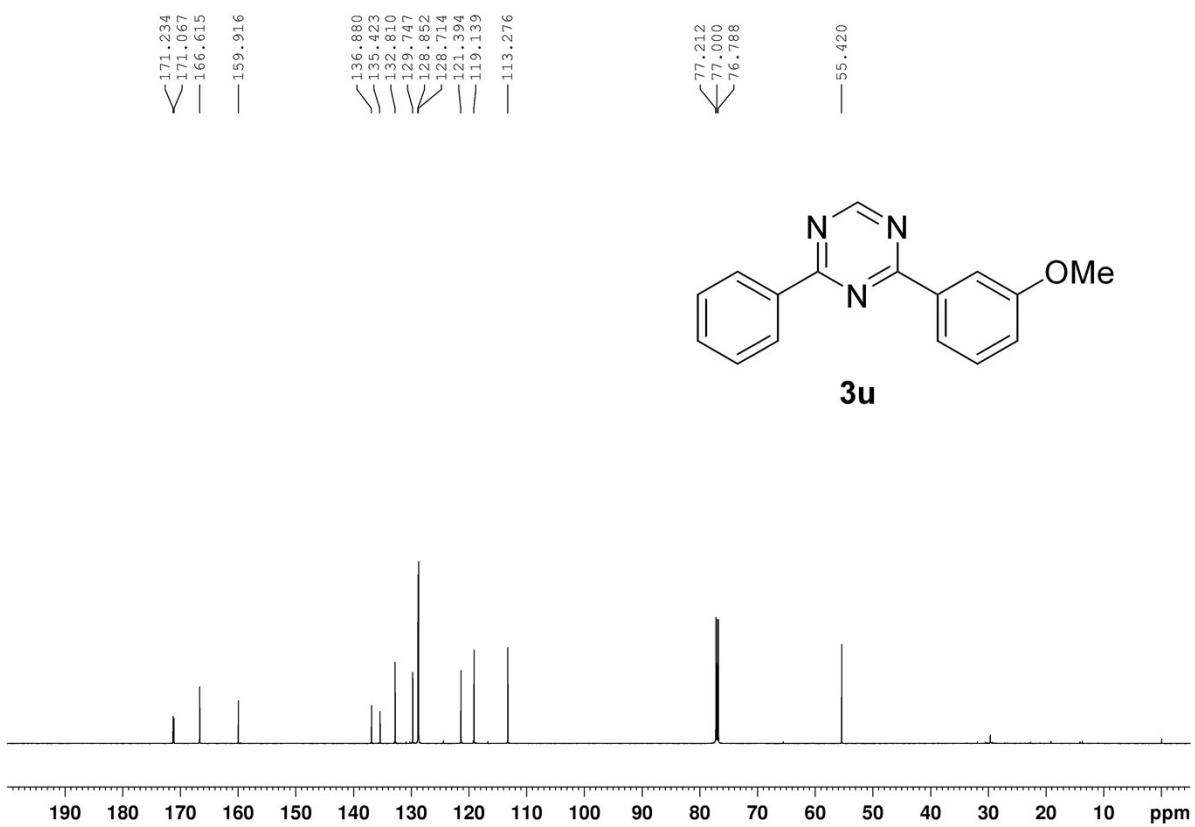



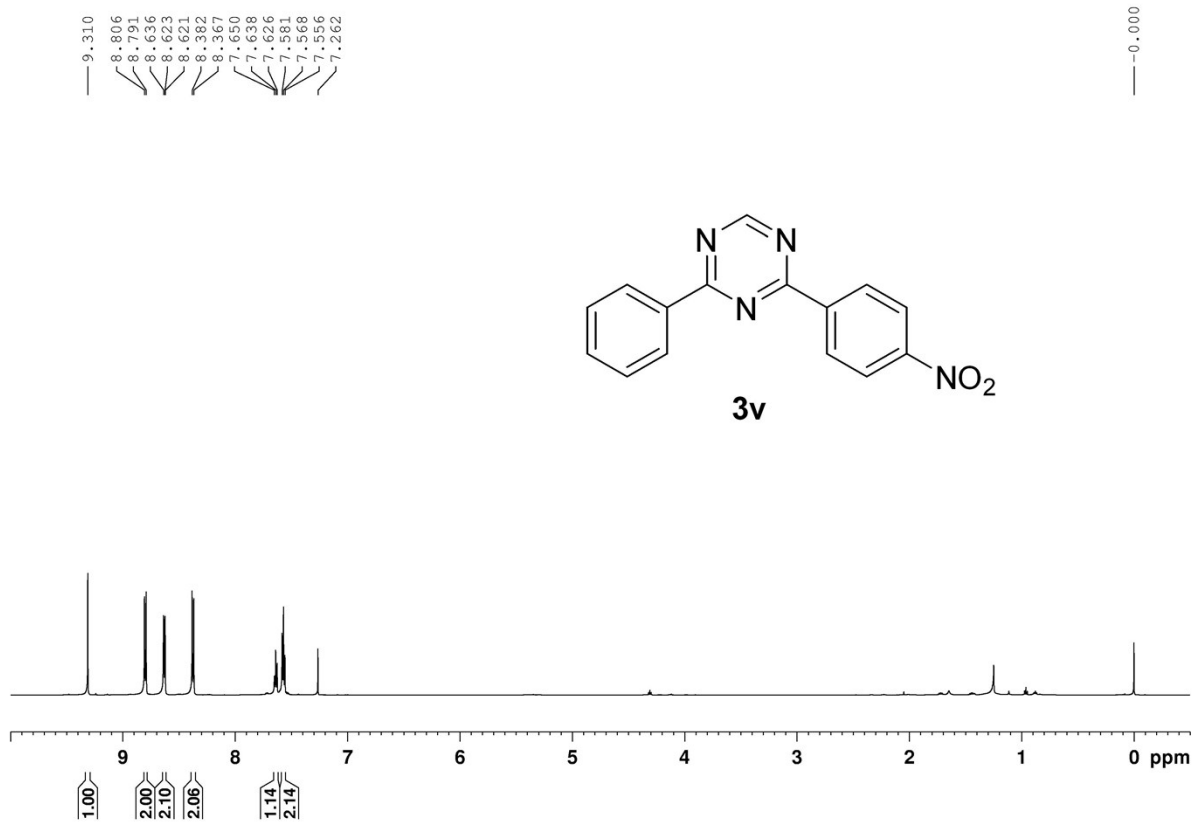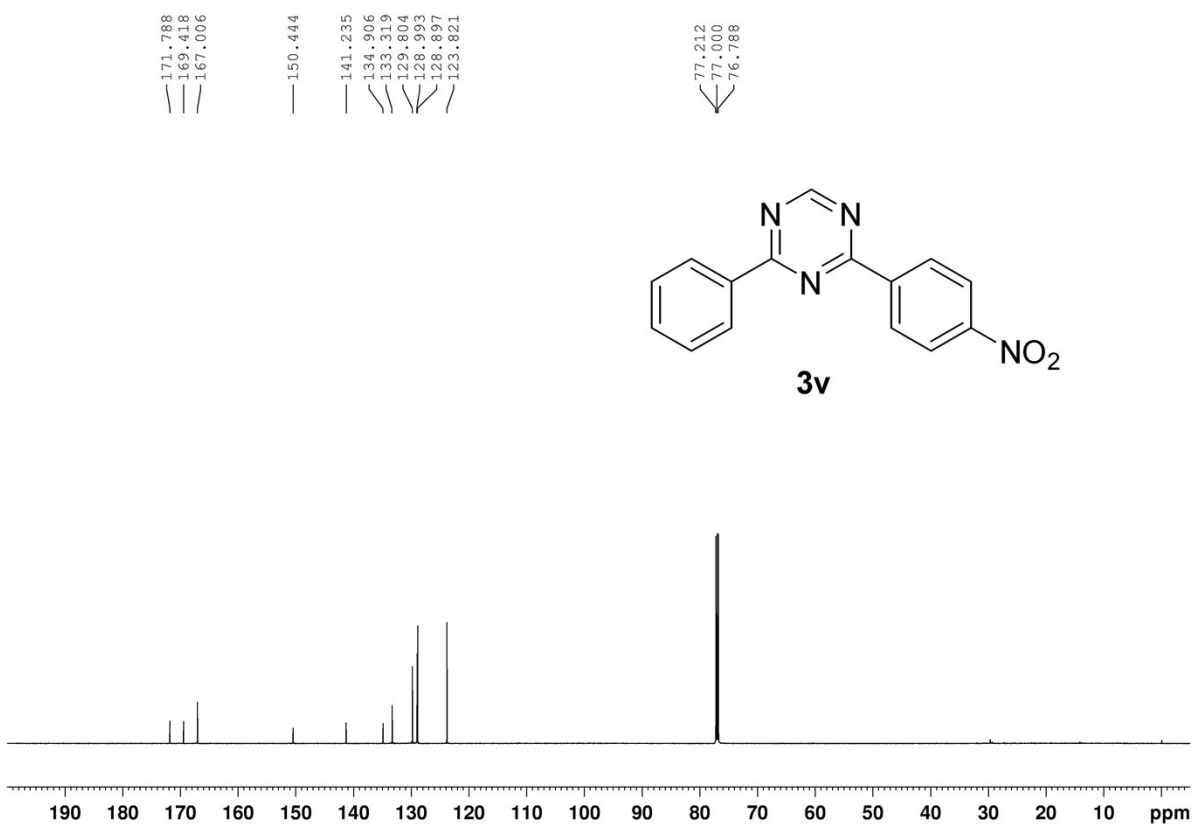

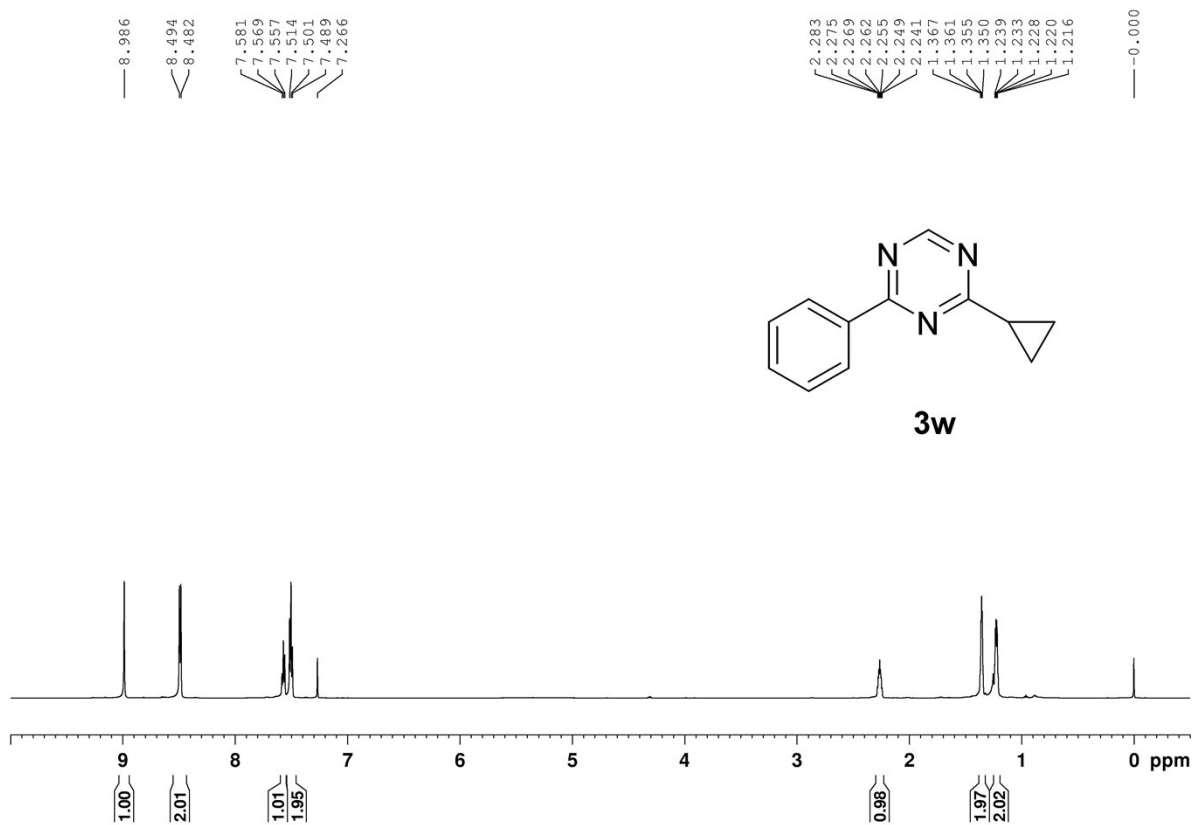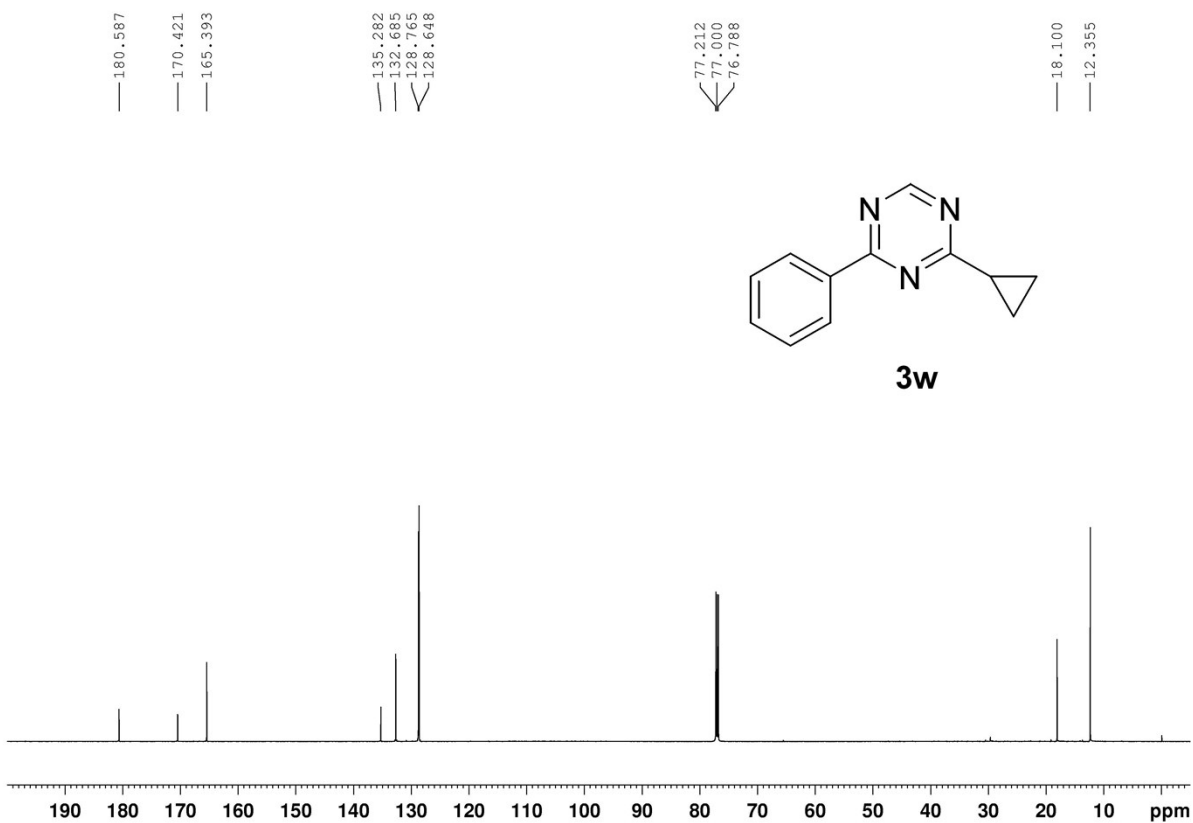

8.371  
8.370  
8.358  
8.129  
7.813  
7.800  
7.788  
7.786  
7.769  
7.756  
7.560  
7.548  
7.535  
7.501  
7.489  
7.476  
7.431  
7.419  
7.260

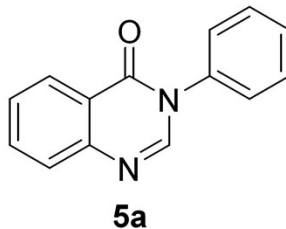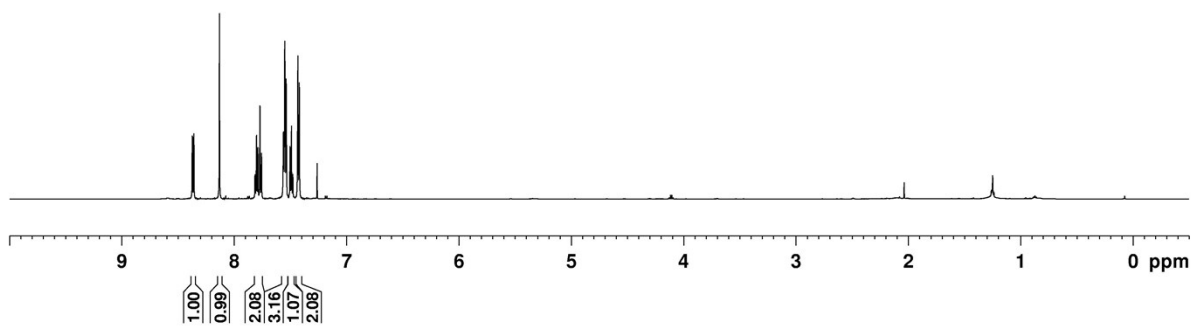

160.693  
147.769  
146.042  
137.390  
134.549  
129.597  
129.066  
127.608  
127.505  
127.118  
126.943  
122.291

77.212  
77.000  
76.788

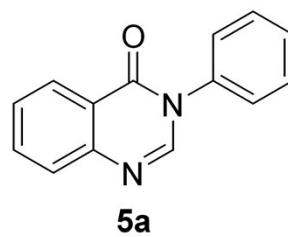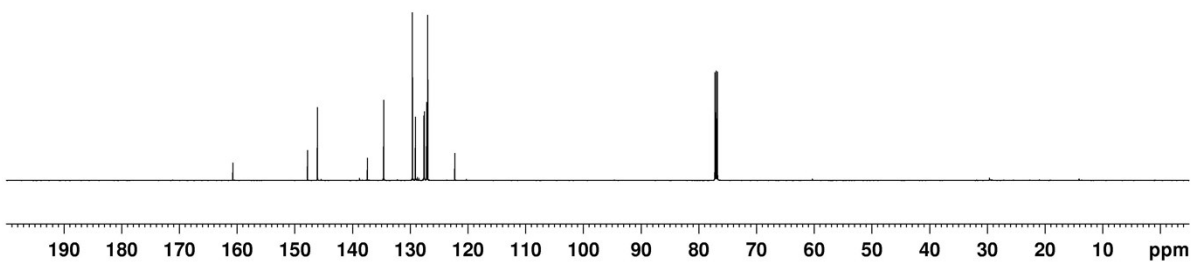

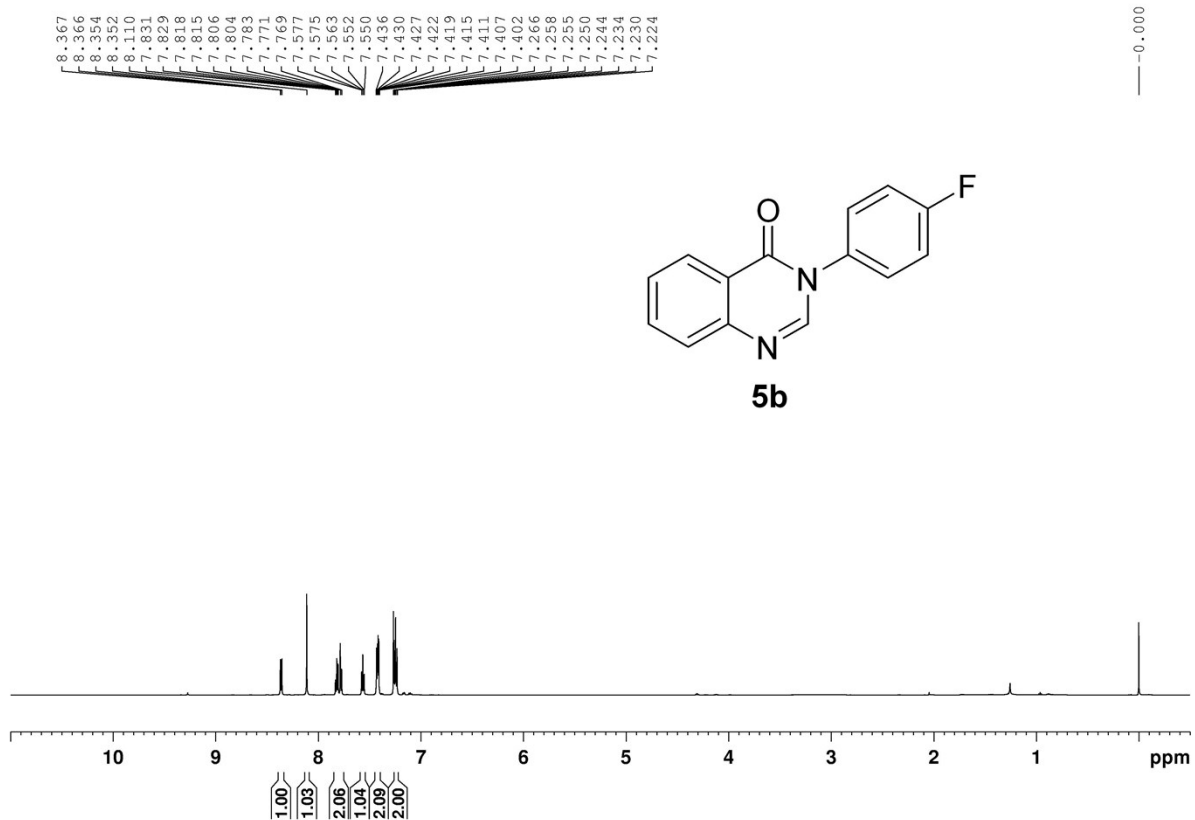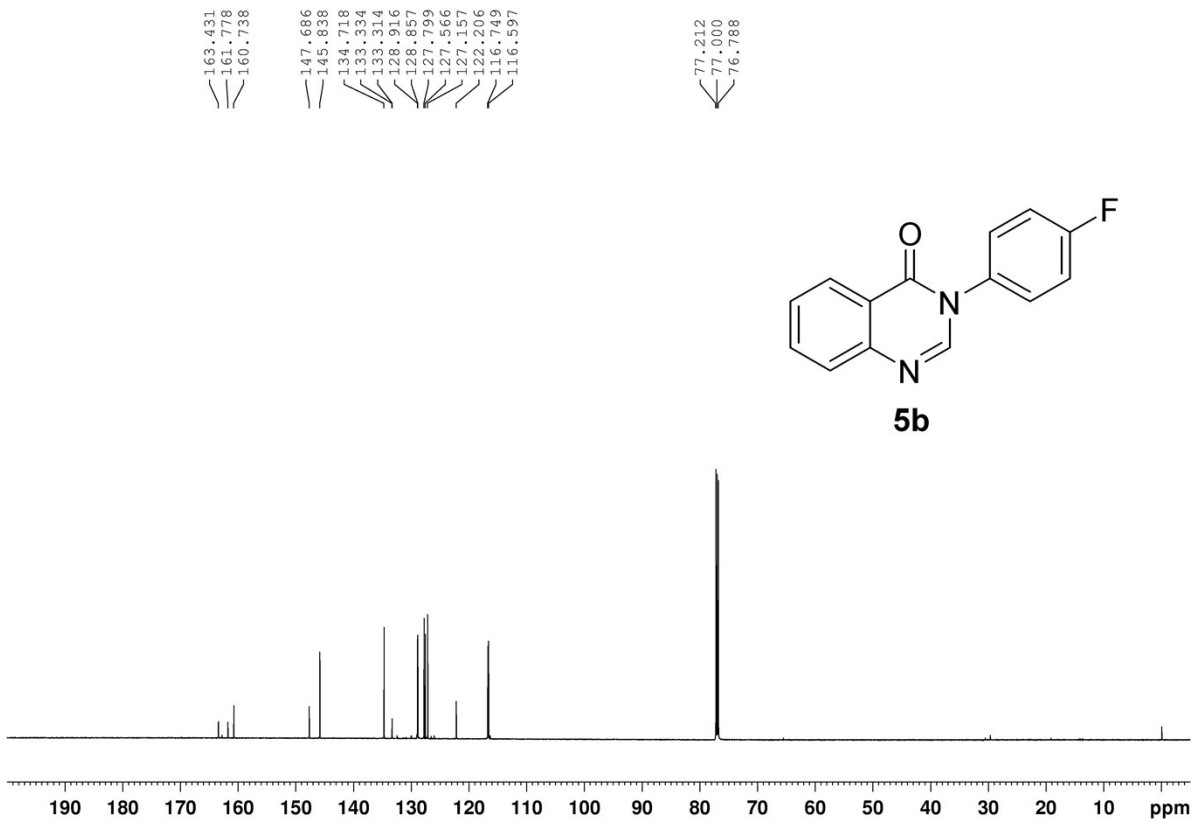

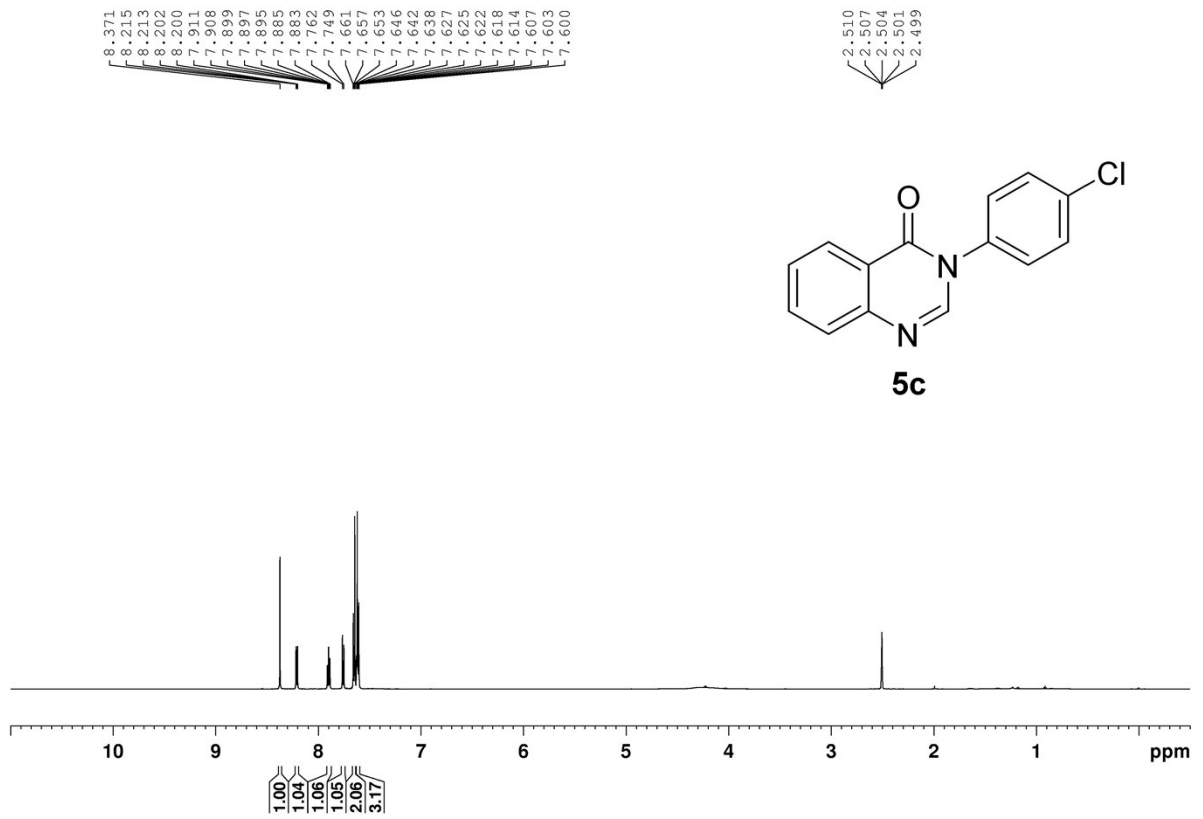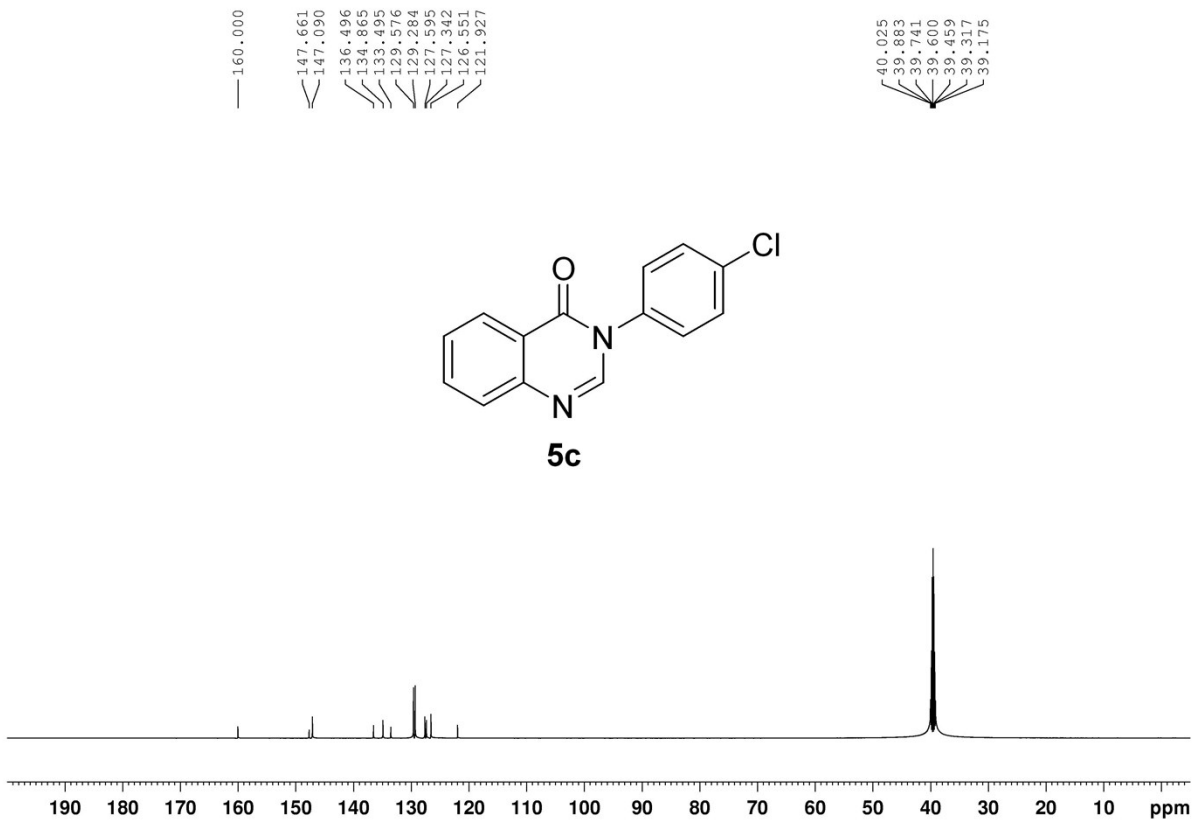

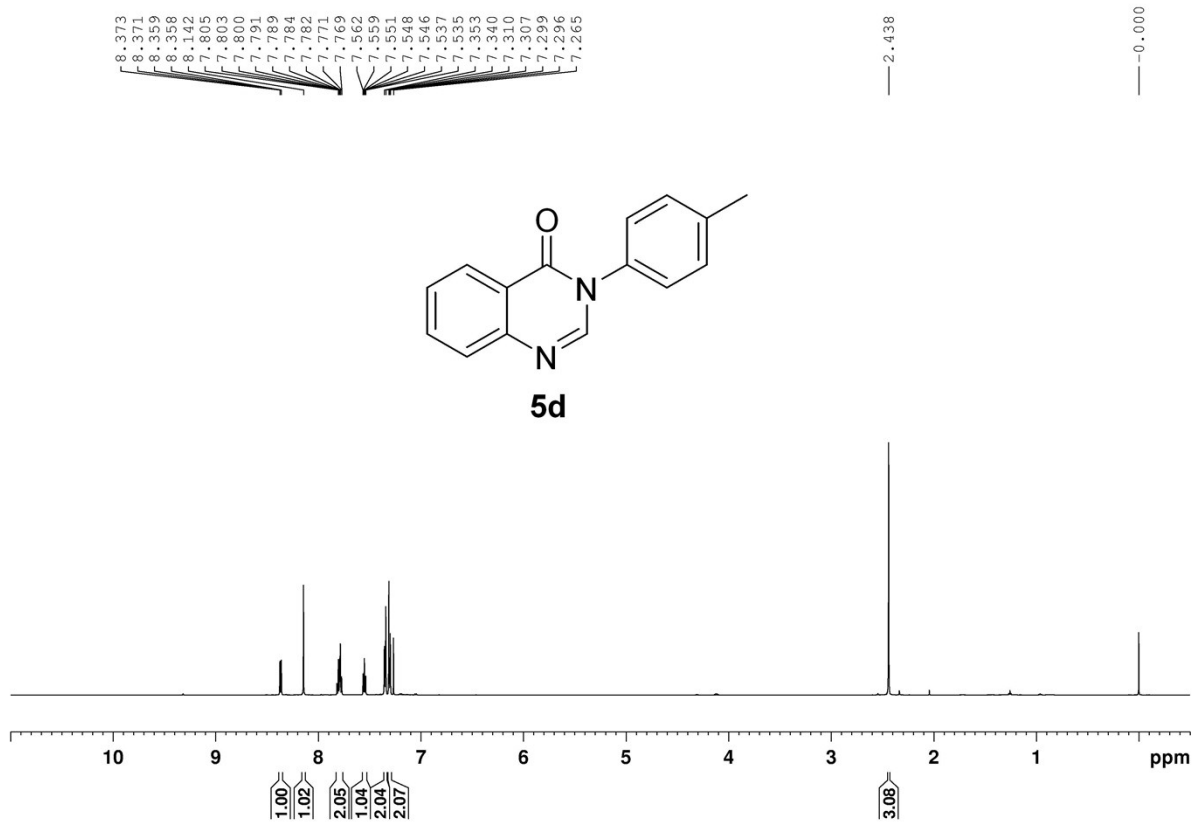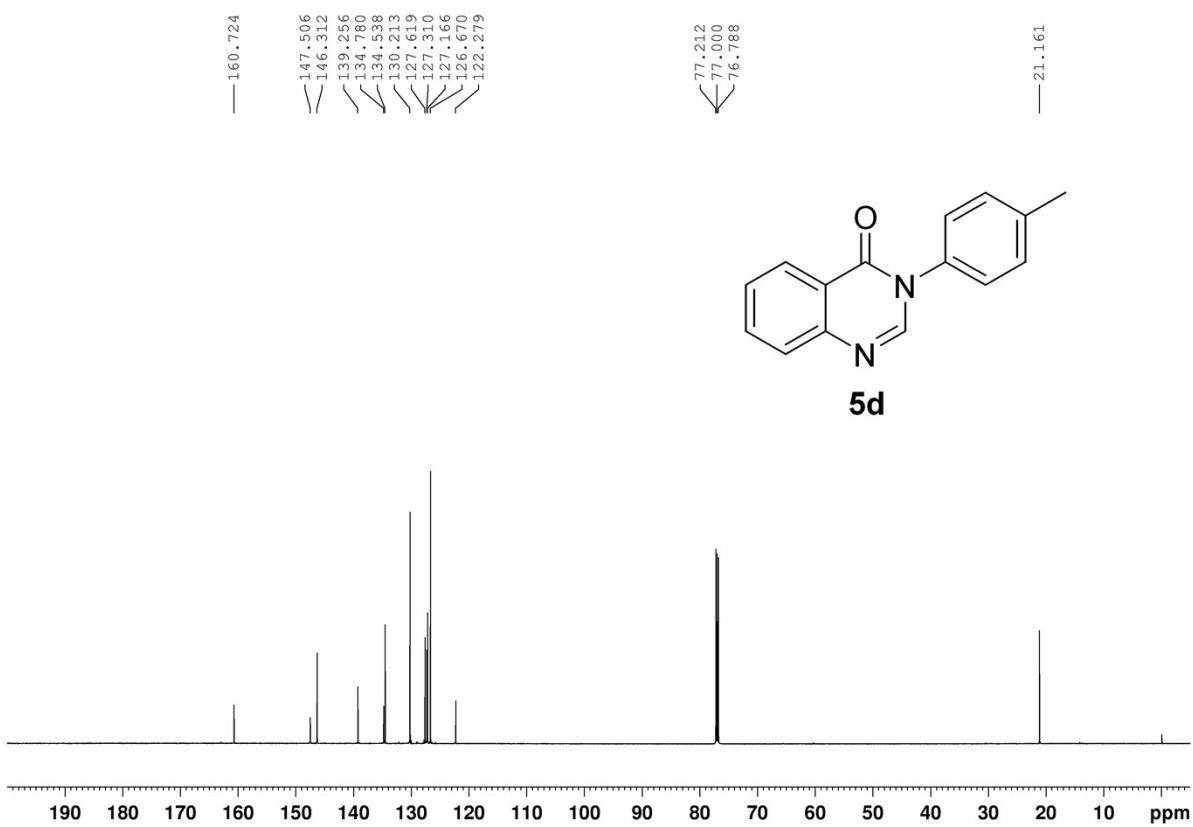

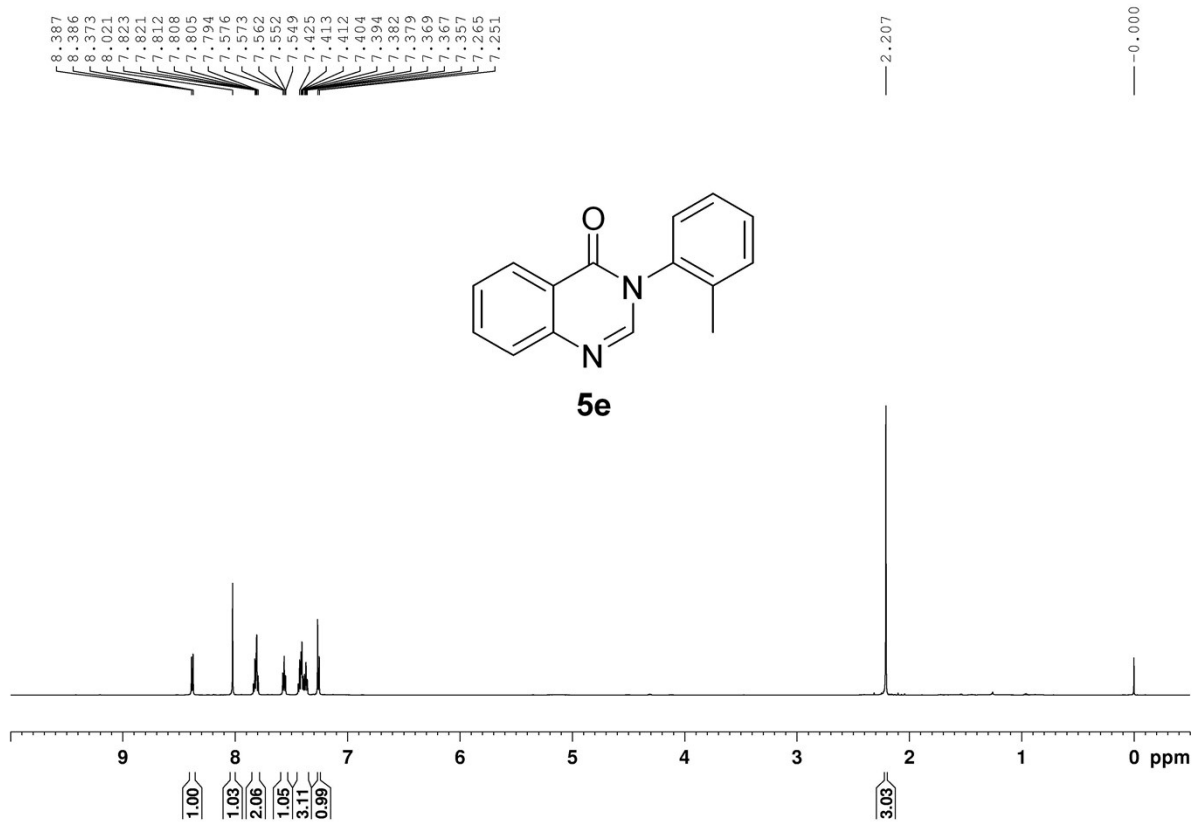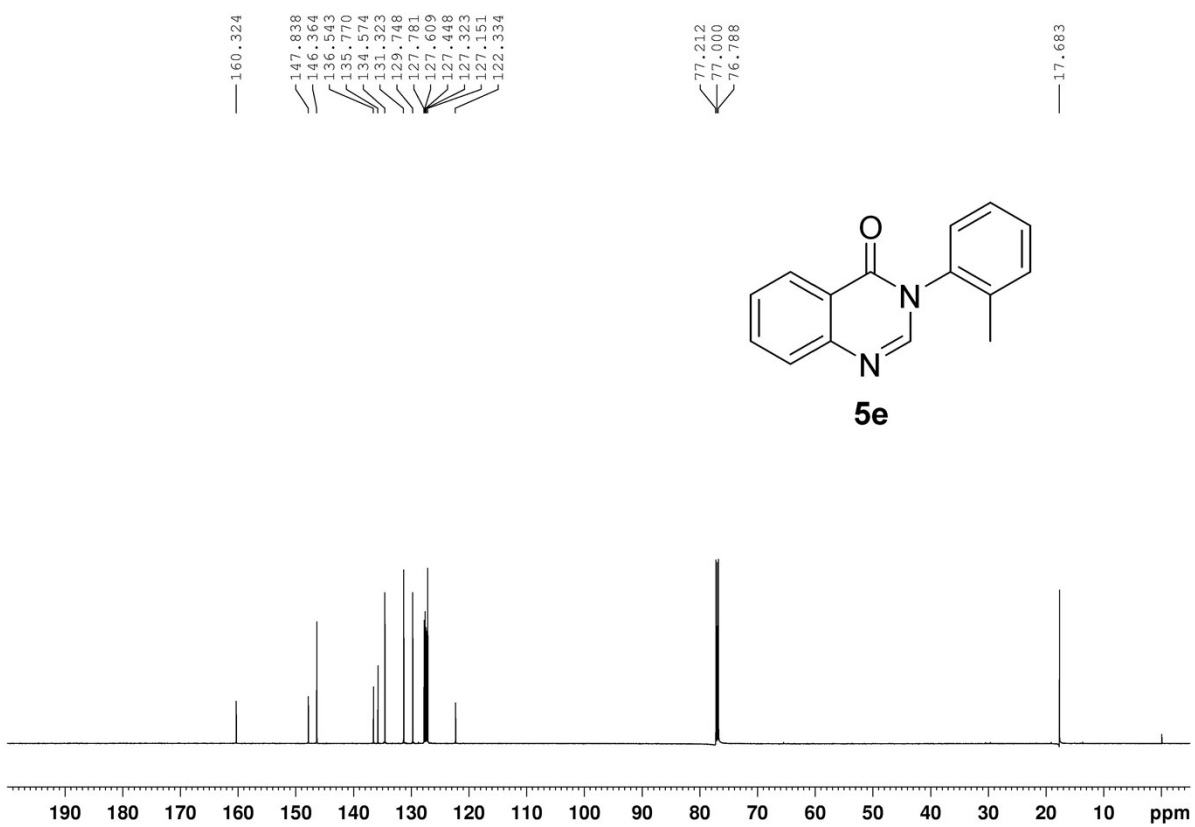

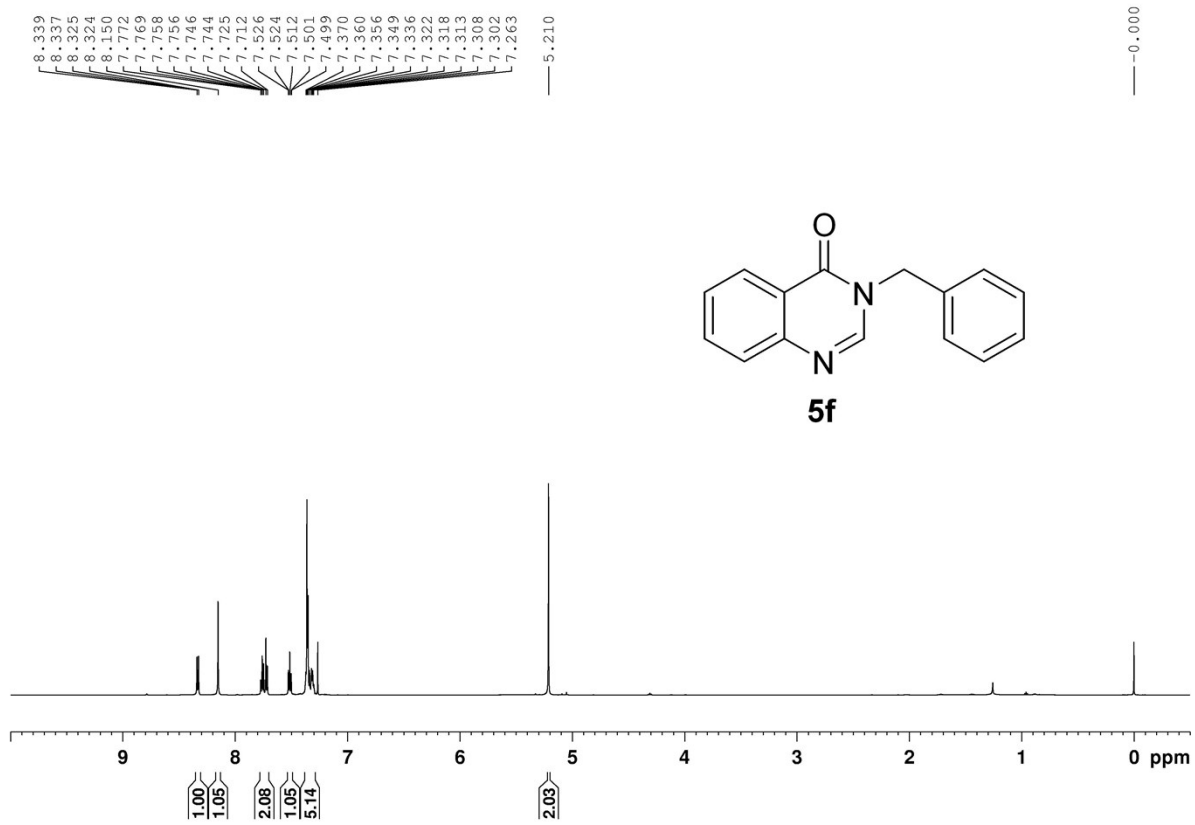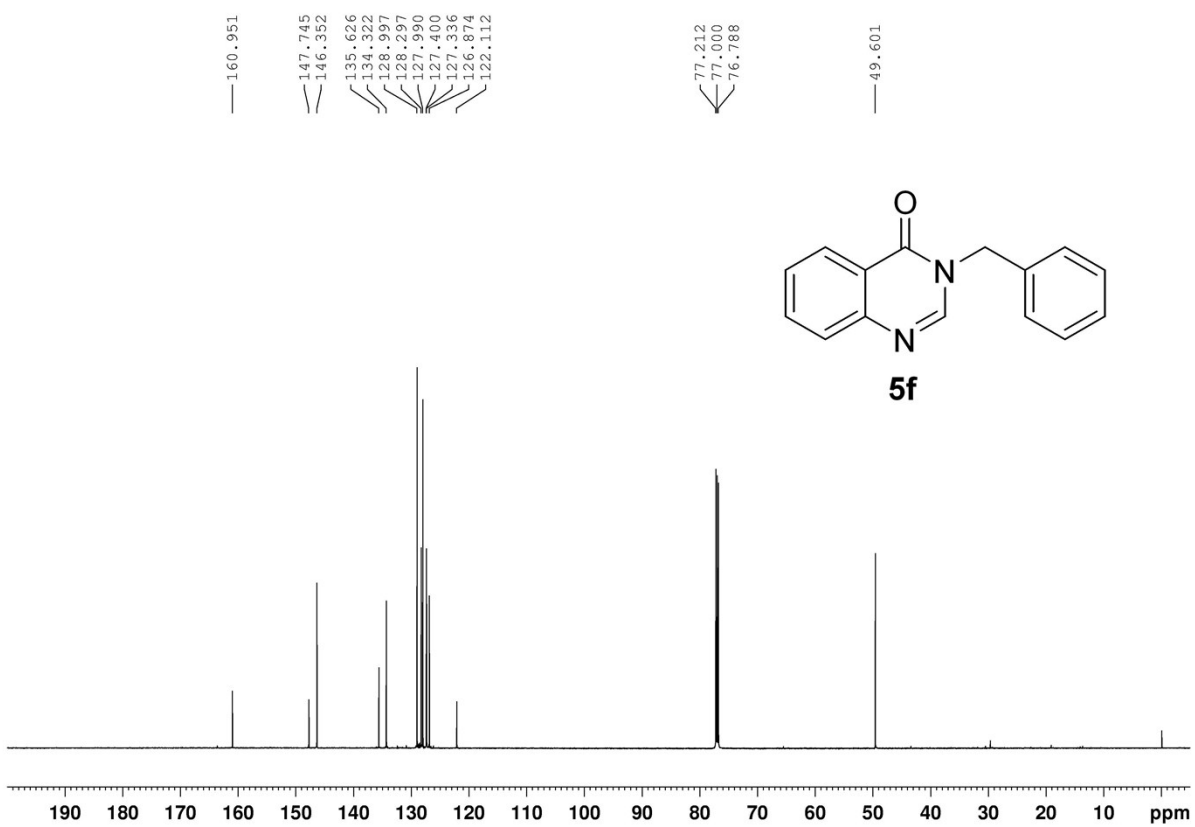



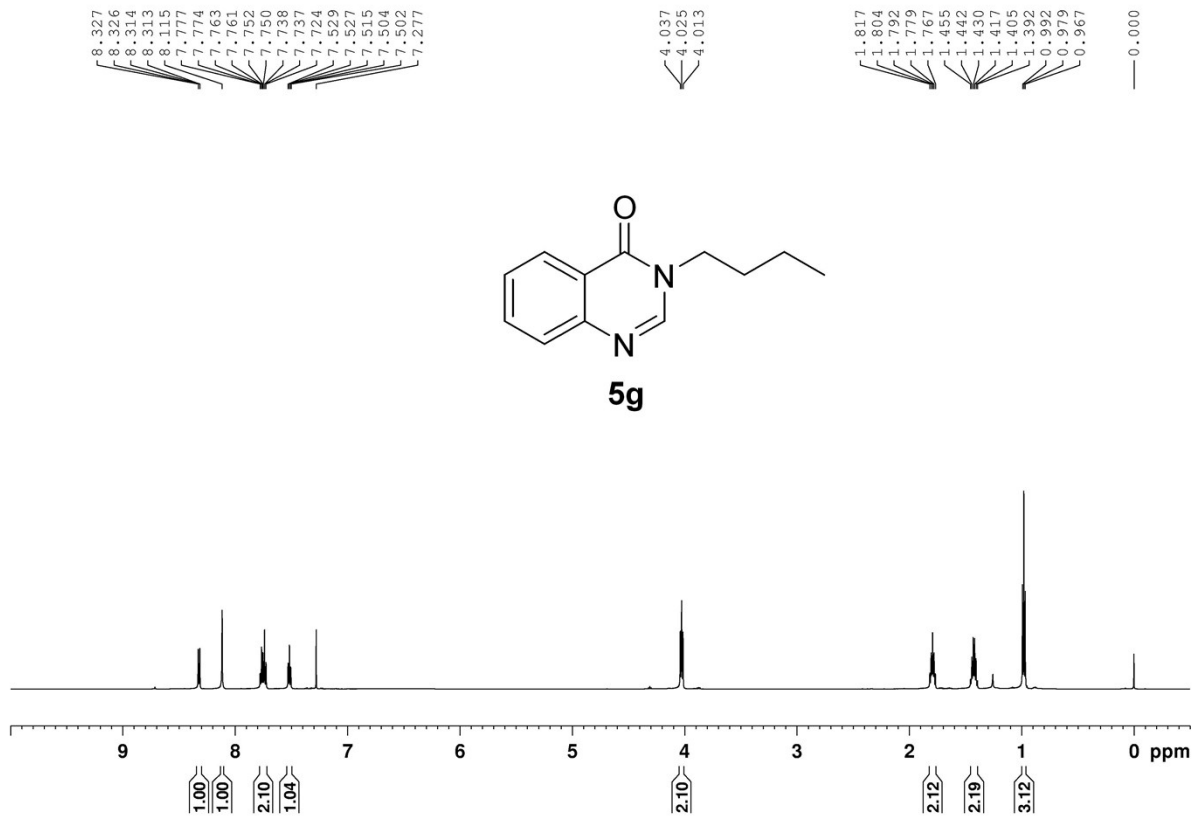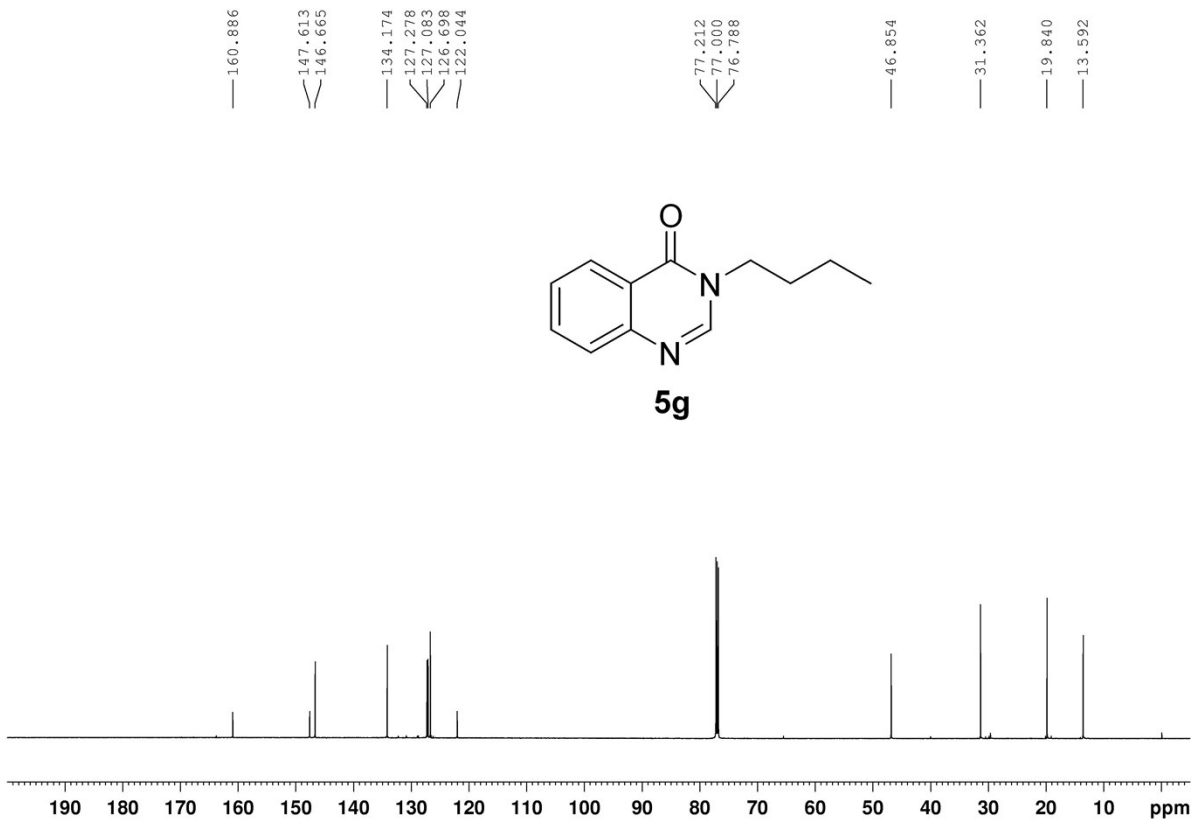

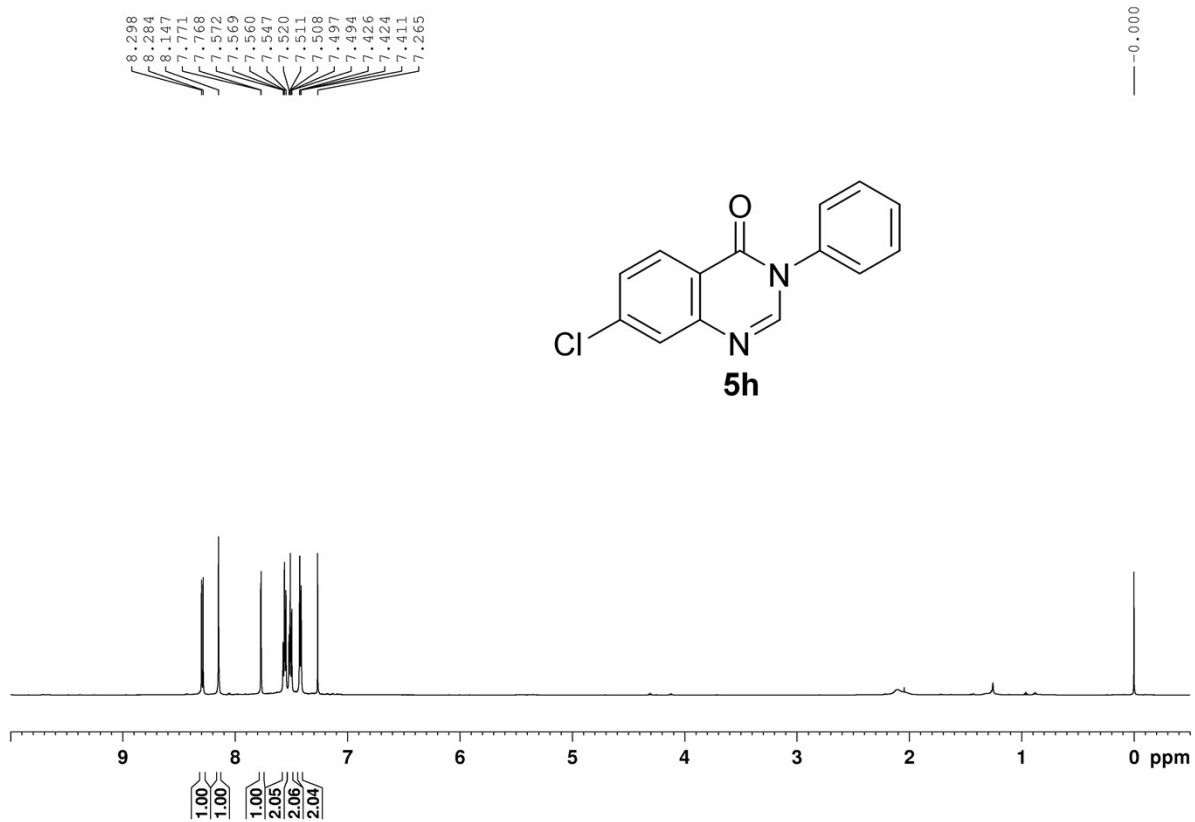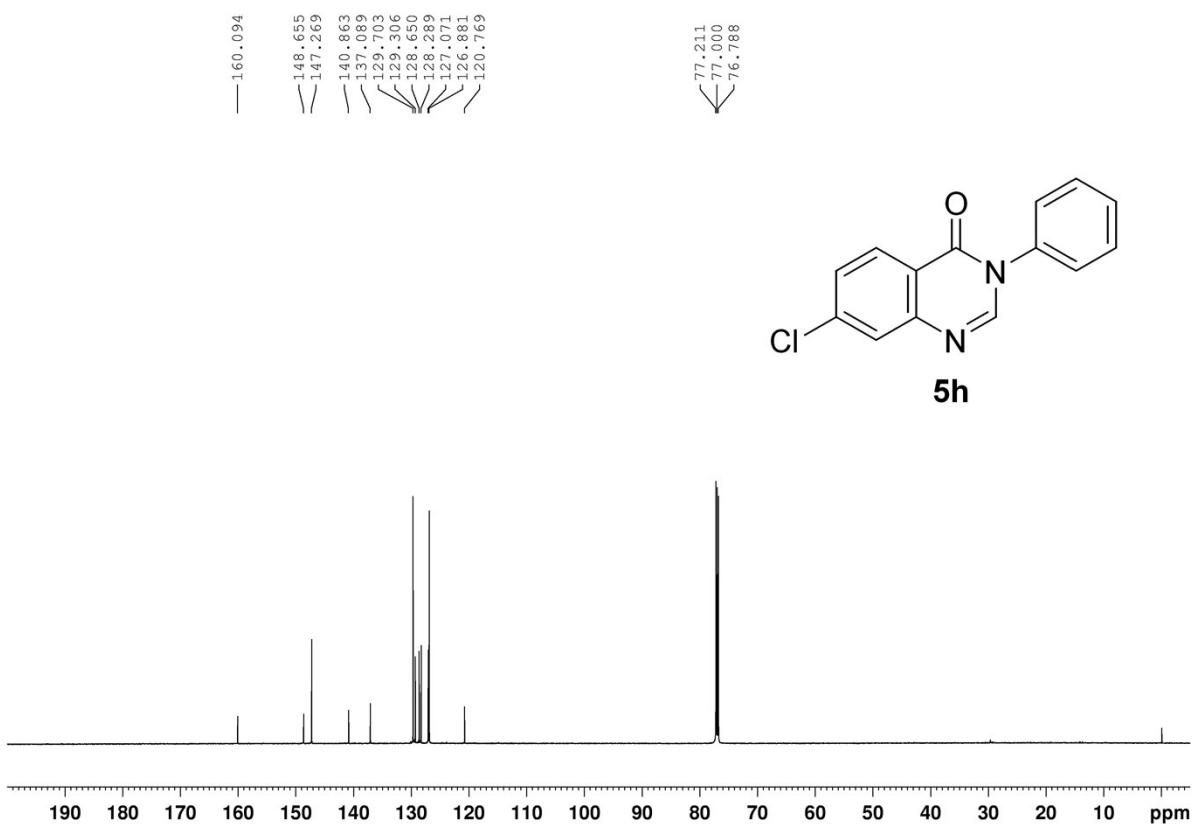

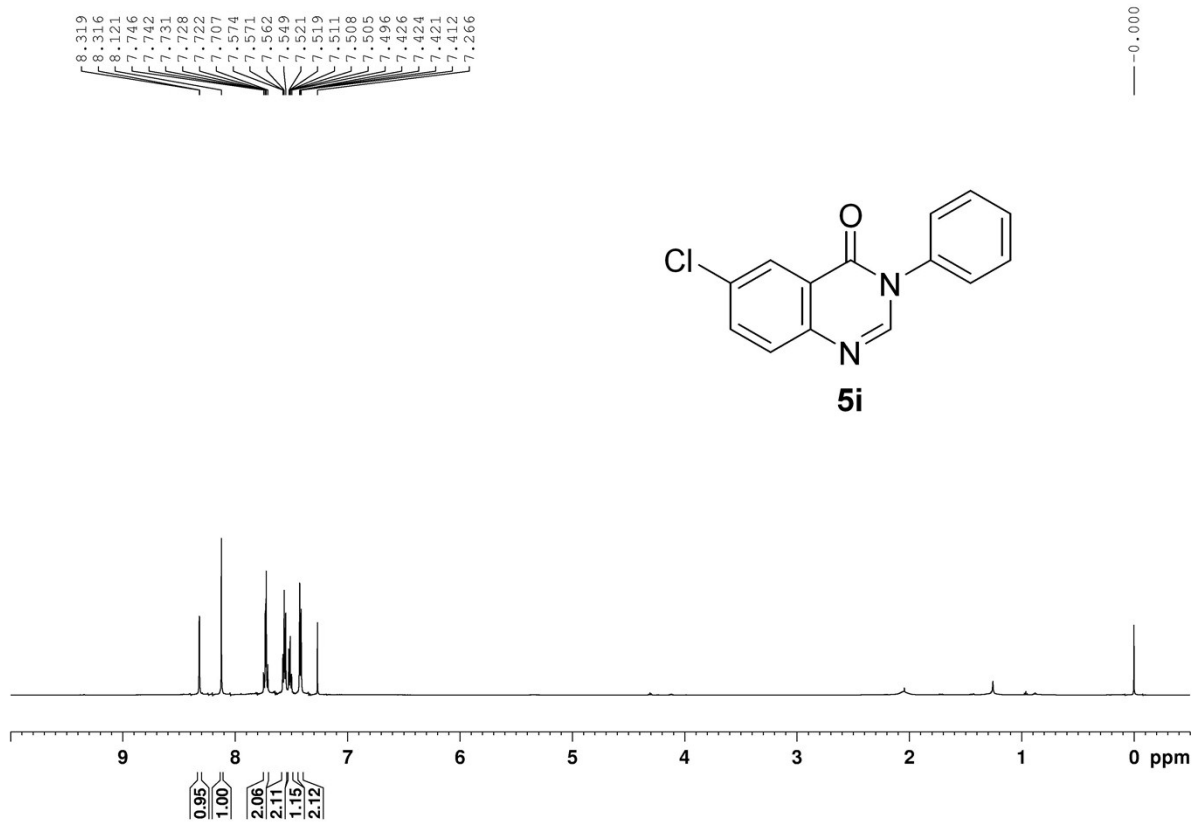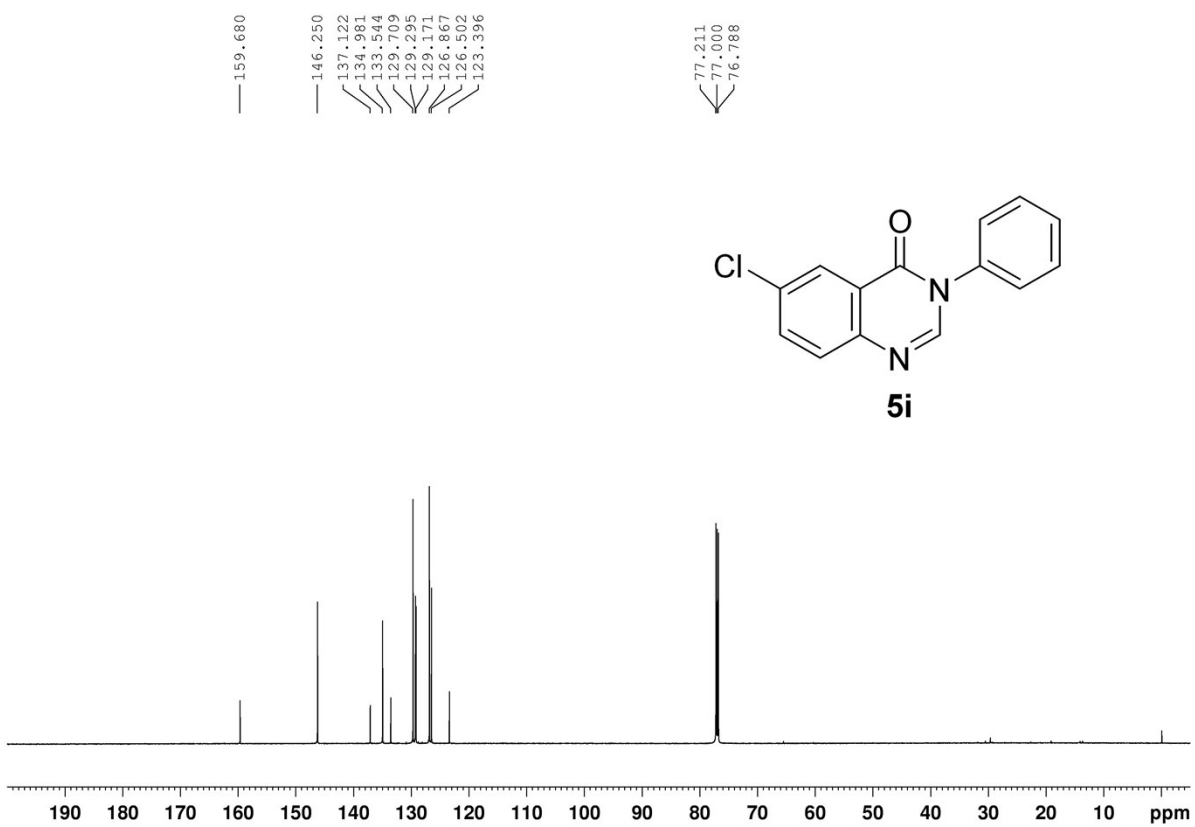

Supplement: c9ob01641d1.pdf [file c9ob01641d1.pdf]
